# Supplementary material for: Acute histoplasmosis in immunocompetent travelers: a systematic review of literature
Source: BMC Infect Dis. 2018 Dec 18;18:673. doi: 10.1186/s12879-018-3476-z (PMC6299618; doi:10.1186/s12879-018-3476-z)
Supplement: Supplementary file 1 — Excel sheet including all the demographical, clinical, radiological and treatment characteristics registered for each case. A row of the sheet = a case. (XLSX 412 kb) [file 12879_2018_3476_MOESM1_ESM.xlsx]

## Sheet: Foglio1
prov_ref	articolo	anno_ref	refer	n°paz_ref	maschio	età	origine	comorbid	scopo	speleol	tourism	profess	volont	occupazione	contin	latin_am	other_countries	amer_si	amer_no	NA_Usa_Mex	paese_or	destin	usa_can	mexico	c_americ	s_americ	africa	other_c	se_asia	austr_oc	paese visitato	zona	esposiz	inter_tr	cave_bat	bird_chi	outdoor	movesoil	other	cluster	ar	ar_perc	ar_anal	sintomi	febbre	brividi	sin_resp	tosse	dispnea
EN	full	2007	alonso et al, imported acute histoplasmosis with rheumatologic manifestations in spanish travelers. J travel med 2007; 14:338-342.		0		SPAIN		VOLUNTEER	0	0	0	1	volunteer	SOUTH AMERICA	yes	0	1	0	no	SPAIN	ECUADOR	0	0	0	1	0	0	0	0	ECUADOR	andean highlands near otavalo	3	1	0	1	1	0	agriculture	1		1	3	1	1	0	1	1	0
EN	full	2007	alonso et al, imported acute histoplasmosis with rheumatologic manifestations in spanish travelers. J travel med 2007; 14:338-342.		0		SPAIN		VOLUNTEER	0	0	0	1	volunteer	SOUTH AMERICA	yes	0	1	0	no	SPAIN	ECUADOR	0	0	0	1	0	0	0	0	ECUADOR	andean highlands near otavalo	3	1	0	1	1	0	agriculture	1		1	3	1	1	0	0	0	0
EN	full	2007	alonso et al, imported acute histoplasmosis with rheumatologic manifestations in spanish travelers. J travel med 2007; 14:338-342.		0		SPAIN		VOLUNTEER	0	0	0	1	volunteer	SOUTH AMERICA	yes	0	1	0	no	SPAIN	ECUADOR	0	0	0	1	0	0	0	0	ECUADOR	andean highlands near otavalo	3	1	0	1	1	0	agriculture	1		1	3	1	1	0	0	0	0
EN	full	2007	alonso et al, imported acute histoplasmosis with rheumatologic manifestations in spanish travelers. J travel med 2007; 14:338-342.	4	0		SPAIN		VOLUNTEER	0	0	0	1	volunteer	SOUTH AMERICA	yes	0	1	0	no	SPAIN	ECUADOR	0	0	0	1	0	0	0	0				1	0	1	1	0	agriculture	1	4/4	1	3	1	1	0	1	1	0
EN	full	2013	ardizzoni, baschieri, manca et al. The mycoarray as an iad for the diagnosis of an imported case of histoplasmosis in an italian traveler returning from brazil. Journal of travel medicine 2013; 20(5):336-339	1	1	30	ITALY			0	0	0	0		SOUTH AMERICA	yes	0	1	0	no	ITALY	BRASIL	0	0	0	1	0	0	0	0	BRASIL	south west	1	1	1	0	1	0	no	0	caso sporadico		4	1	1	0	1	1	0
EN	full	2011	ardizzoni, baschieri, manca et al. The protein mycoarray: a novel serological assay for the laboratory diagnosis of primitive endemic mycoses. New microbiologica, 2011; 34: 307-316	2	1		ITALY			0	0	0	0		SOUTH AMERICA	yes	0	1	0	no	ITALY	ECUADOR	0	0	0	1	0	0	0	0	ECUADOR	otonga	4	1	0	0	1	0	NR	0	caso sporadico		4	1
EN	full	2011	ardizzoni, baschieri, manca et al. The protein mycoarray: a novel serological assay for the laboratory diagnosis of primitive endemic mycoses. New microbiologica, 2011; 34: 307-316		1		ITALY			0	0	0	0		SOUTH AMERICA	yes	0	1	0	no	ITALY	ECUADOR	0	0	0	1	0	0	0	0	ECUADOR	otonga	4	1	0	0	1	0	NR	0	caso sporadico		4	1
EN	full	2013	bitterman et al. Prolonged fever and splinter hemorrages in an immunocompetent traveler with disseminated histoplasmosis. J travel med 2013; 20:57-59	1	1	64	ISRAEL	no	TOURISM	0	1	0	0	tourism	AFRICA	no	1	0	1	no	ISRAEL	JORDAN, BOLIVIA, BRASIL, ETHIOPIA, ANGOLA	0	0	0	0	1	0	0	0	JORDAN, BOLIVIA, BRASIL, ETHIOPIA, ANGOLA	NR	4	1	0	0	1	0	river water	0	caso sporadico		4	1	1	0	1	1	0
EN	full	2013	catania, martin, corey et al. Diagnostic dilemma in a returning traveler with fever. Diagnostic microbiology and infectious disease 2013; 77:85-86	1	0	19	USA	no	VOLUNTEER	0	0	0	0	volunteer	SOUTH AMERICA	yes	0	1	0	no	USA	PERU	0	0	0	1	0	0	0	0	PERU	NR	1	1	1	0	0	1	no	0	caso sporadico		4	1	1	0	0	0	0
EN	full	1999	Clyti, E., et al. (1999). "[Disseminated histoplasmosis detected by lingual and tonsillar erosions in an immunocompetent patient]."Ann Dermatol Venereol126(10): 709-711.	1	1	45	FRANCE	smoker, alchool	PROFESSIONAL	0	0	1	0	professional travel	SOUTH AMERICA	yes	0	1	0	no	FRANCE	GUYANA	0	0	0	1	0	0	0	0	GUYANA	NR	4	1	0	0	1	1	NR	0	caso sporadico		4	1	0	0	0	0	0
EN	full	2012	Corti et al, Brote de histoplasmosis de primoinfeccion en cinco hermanas. Rev Pat Trop 41(1); 103-110.	5	0	13															ARGENTINA	ARGENTINA	0	0	0	1	0	0	0	0				0	0	1	0	1		1	5\7	0.7142	3	1	1	0	1	1	0
EN	full	1979	Craven, S. A. and S. R. Benatar (1979). "Histoplasmosis in the Cape Province. A report of the second known outbreak." S Afr Med J 55(3): 89-92.		1	66	SOUTH AFRICA	no	SPELEOLOGIST	1	0	0	0	speleologist	SOUTH AFRICA	no	1	0	1	no	SOUTH AFRICA	SOUTH AFRICA	0	0	0	0	1	0	0	0	SOUTH AFRICA	de hoop cave	1	0	1	0	0	0	no	1		0.7143	3	1	1	0	0	0	0
biblio	full	1957	Dean. Cave disease. Cent Afr J Med. 1957 Mar;3(3):79-81		1		SOUTH AFRICA		SPELEOLOGIST	1	0	0	0	speleologist	SOUTH AFRICA	no	1	0	1	no	SOUTH AFRICA	SOUTH AFRICA	0	0	0	0	1	0	0	0	SOUTH AFRICA	urungwe reserve, mashonaland	1	0	1	0	0	0	no	1		0.6667	2	1	1	0	1	1	1
EN	full	2002	Erkens, K., et al. (2002). "[Histoplasmosis group disease in bat researchers returning from Cuba]."Dtsch Med Wochenschr127(1-2): 21-25.		1	40	GERMANY		PROFESSIONAL	0	0	1	0	biologist	CENTRAL AMERICA	yes	0	1	0	no	GERMANY	CUBA	0	0	1	0	0	0	0	0	CUBA	NR	1	1	1	0	0	1	no	1		0.75	3	1	1	0	1	0	1
EN	full	2002	Erkens, K., et al. (2002). "[Histoplasmosis group disease in bat researchers returning from Cuba]."Dtsch Med Wochenschr127(1-2): 21-25.		1	25	GERMANY		PROFESSIONAL	0	0	1	0	biologist	CENTRAL AMERICA	yes	0	1	0	no	GERMANY	CUBA	0	0	1	0	0	0	0	0	CUBA	NR	1	1	1	0	0	1	no	1		0.75	3	1	1	0	1	0	1
EN	full	2002	Erkens, K., et al. (2002). "[Histoplasmosis group disease in bat researchers returning from Cuba]."Dtsch Med Wochenschr127(1-2): 21-25.		1	28	GERMANY		PROFESSIONAL	0	0	1	0	biologist	CENTRAL AMERICA	yes	0	1	0	no	GERMANY	CUBA	0	0	1	0	0	0	0	0	CUBA	NR	1	1	1	0	0	1	no	1		0.75	3	1	1	0	1	0	1
EN	full	2015	Gandhi et al. Update on the spectrum of histoplasmosis among hispanic patients presenting to a New York City municipal hospital: a contemporary case series. Res Med Case Rep 16: 60-64.	1+3	0	47															MEXICO	MEXICO	0	1	0	0	0	0	0	0				0	0	0	0	1		1	4\4	1	3	1	1	0	1	1	1
EN	full	2000	Gascon, J., et al. (2000). "Imported histoplasmosis in Spain."J Travel Med7(2): 89-91.	7			SPAIN		TOURISM	0	1	0	0	tourism	CENTRAL AMERICA	yes	0	1	0	no	SPAIN	DOMINICAN REPUBLIC	0	0	1	0	0	0	0	0	DOMINICAN REPUBLIC	el pomier caves in the palave area	1	1	1	0	0	0	no	1	2/6	0.3332	1	1	1	1	1	1	1
EN	full	2000	Gascon, J., et al. (2000). "Imported histoplasmosis in Spain."J Travel Med7(2): 89-91.				SPAIN		TOURISM	0	1	0	0	tourism	CENTRAL AMERICA	yes	0	1	0	no	SPAIN	DOMINICAN REPUBLIC	0	0	1	0	0	0	0	0	DOMINICAN REPUBLIC	el pomier caves in the palave area	1	1	1	0	0	0	no	1		0.3332	1	1	1	0	1	1	0
EN	full	2000	Gascon, J., et al. (2000). "Imported histoplasmosis in Spain."J Travel Med7(2): 89-91.				SPAIN		TOURISM	0	1	0	0	tourism	SOUTH AMERICA	yes	0	1	0	no	SPAIN	GUATEMALA	0	0	1	0	0	0	0	0	PERU	NR	1	1	1	0	0	0	no	0	caso sporadico		4	1	1	1	1	1	0
EN	full	2000	Gascon, J., et al. (2000). "Imported histoplasmosis in Spain."J Travel Med7(2): 89-91.				SPAIN		VOLUNTEER	0	0	0	0	volunteer	CENTRAL AMERICA	yes	0	1	0	no	SPAIN	PERU	0	0	1	1	0	0	0	0	GUATEMALA	NR	4	1	0	0	1	1	dust	1		1	3	1	1	0	1	1	1
EN	full	2000	Gascon, J., et al. (2000). "Imported histoplasmosis in Spain."J Travel Med7(2): 89-91.				SPAIN		TOURISM	0	1	0	0	tourism	SOUTH AMERICA	yes	0	1	0	no	SPAIN	NICARAGUA	0	0	1	0	0	0	0	0	COLOMBIA	NR	4	1	0	0	1	0	dust	0	caso sporadico		4	1	1	0	1	1	1
biblio	full	1962	gelfand M. 1962. cave disease. A report of three cases from southern rhodesia. Centr afr j med, 8: 461-6	3	0	26	EUROPE	no	SPELEOLOGIST	1	0	0	0	speleologist	SOUTH AFRICA	no	1	0	1	no	EUROPE	SOUTH AFRICA	0	0	0	0	1	0	0	0	SOUTH AFRICA	ulster cave, sinoia,	1	1	1	0	0	0	no	1	3/12	0.25	1	1	1	1	1	1	1
EN	full	2002	Hernan Cabello et al, Histoplasmosis pulmonar. Rev Chil Infect 2002, 19(1):54-59.	1	1	43															CHILE	PERU	0	0	0	1	0	0	0	0				1	1	0	0	0		0	caso sporadico			1	1	0	1	1	0
EN	full	2008	hoenigl et al. Pulmonary histoplasmosis in three austrian travelers after a journey to mexico. Infection 2008 jun; 36(3):282-4	3	0	37	AUSTRIA		TOURISM	0	1	0	0	tourism	NORTH AMERICA	yes	0	1	0	yes	AUSTRIA	MEXICO	0	1	0	0	0	0	0	0	MEXICO	(balancanche, near cancun)	1	1	1	0	0	0	no	0	caso sporadico		4	1	1	0	1	0	1
EN	full	2008	hoenigl et al. Pulmonary histoplasmosis in three austrian travelers after a journey to mexico. Infection 2008 jun; 36(3):282-4		0	47	AUSTRIA		TOURISM	0	1	0	0	tourism	NORTH AMERICA	yes	0	1	0	yes	AUSTRIA	MEXICO	0	1	0	0	0	0	0	0	MEXICO	(balancanche, near cancun)	1	1	1	0	0	0	no	0	caso sporadico		4	1	1	0	1	0	1
EN	full	2008	hoenigl et al. Pulmonary histoplasmosis in three austrian travelers after a journey to mexico. Infection 2008 jun; 36(3):282-4		1	47	AUSTRIA		TOURISM	0	1	0	0	tourism	NORTH AMERICA	yes	0	1	0	yes	AUSTRIA	MEXICO	0	1	0	0	0	0	0	0	MEXICO	(balancanche, near cancun)	1	1	1	0	0	0	no	0	caso sporadico		4	1	1	0	1	0	1
EN	full	2008	julg et al. Bat associated histoplasmosis can be transmitted at entrances of bat caves and not only inside the caves. J travel med 2008; 15:133-136		1	41	GERMANY		PROFESSIONAL	0	0	1	0	biologist	CENTRAL AMERICA	yes	0	1	0	no	GERMANY	ANTILLE	0	0	1	0	0	0	0	0	ANTILLE	tamana cave, trinidad	1	1	1	0	0	1	no	1		1	3	1	0	0	0	0	0
EN	full	2008	julg et al. Bat associated histoplasmosis can be transmitted at entrances of bat caves and not only inside the caves. J travel med 2008; 15:133-136	3	1	42	GERMANY		PROFESSIONAL	0	0	1	0	biologist	CENTRAL AMERICA	yes	0	1	0	no	GERMANY	ANTILLE	0	0	1	0	0	0	0	0	ANTILLE	tamana cave, trinidad	1	1	1	0	0	1	no	1	3/3	1	3	1	1	0	0	0	0
EN	full	2008	julg et al. Bat associated histoplasmosis can be transmitted at entrances of bat caves and not only inside the caves. J travel med 2008; 15:133-136		1	38	GERMANY		PROFESSIONAL	0	0	1	0	biologist	CENTRAL AMERICA	yes	0	1	0	no	GERMANY	ANTILLE	0	0	1	0	0	0	0	0	ANTILLE	tamana cave, trinidad	1	1	1	0	0	1	no	1		1	3	1	1	0	0	0	0
EN	full	2012	kajfasz and basiak. Outbreak of pulmonary histoplasmosis involving a group of four polish travellers returning from Ecuador. Int marit Health 2012; 63(1):59-62		1	43	POLAND	no	TOURISM	0	1	0	0	tourism	SOUTH AMERICA	yes	0	1	0	no	POLAND	ECUADOR	0	0	0	1	0	0	0	0	ECUADOR	NR	1	1	1	0	0	0	no	1		1	3	1	1	0	1	1	0
EN	full	2012	kajfasz and basiak. Outbreak of pulmonary histoplasmosis involving a group of four polish travellers returning from Ecuador. Int marit Health 2012; 63(1):59-62		0	23	POLAND	no	TOURISM	0	1	0	0	tourism	SOUTH AMERICA	yes	0	1	0	no	POLAND	ECUADOR	0	0	0	1	0	0	0	0	ECUADOR	NR	1	1	1	0	0	0	no	1		1	3	1	1	0	1	1	0
EN	full	2012	kajfasz and basiak. Outbreak of pulmonary histoplasmosis involving a group of four polish travellers returning from Ecuador. Int marit Health 2012; 63(1):59-62			<44	POLAND	no	TOURISM	0	1	0	0	tourism	SOUTH AMERICA	yes	0	1	0	no	POLAND	ECUADOR	0	0	0	1	0	0	0	0	ECUADOR	NR	1	1	1	0	0	0	no	1		1	3	1	1	0	1	1	0
EN	full	2012	kajfasz and basiak. Outbreak of pulmonary histoplasmosis involving a group of four polish travellers returning from Ecuador. Int marit Health 2012; 63(1):59-62	4	1	43	POLAND	no	TOURISM	0	1	0	0	tourism	SOUTH AMERICA	yes	0	1	0	no	POLAND	ECUADOR	0	0	0	1	0	0	0	0	ECUADOR	NR	1	1	1	0	0	0	no	1	4/4	1	3	1	1	0	1	1	0
EN	full	2015	labhardt, rickerts et al. TB or not TB – persistent cough, fever and night sweats in a 46 year old traveler returning from south america. Travel medicine and infectious diseases 2015; 13, 346-348.	1	1	46	SWISS	no	TOURISM	0	1	0	0		CENTRAL AMERICA	yes	0	1	0	no	SWISS	CENTRAL AMERICA	0	0	1	0	0	0	0	0	CENTRAL AMERICA	BRASIL, ARGENTINA	3	1	0	1	0	0	no	0	caso sporadico		4	1	1	0	1	1	1
biblio	full	1999	Liu et al. Acute disseminated histoplasmosis complicated with hypercalcemia. J Infection 1999, 39:88-96	1	1	46	TAIWAN	no	PROFESSIONAL	0	0	1	0	sailor	SOUTH EAST ASIA	no	1	0	1	no	TAIWAN	INDONESIA	0	0	0	0	0	1	1	0	INDONESIA	sea water	4	1	0	0	1	0	sea water	0	caso sporadico		4	1	1	0	0	0	0
EN	full	1979	Lottenberg, R., et al. (1979). "Pulmonary histoplasmosis associated with exploration of a bat cave."Am J Epidemiol110(2): 156-161.		0	18	USA	no	VOLUNTEER	0	0	0	1	volunteer	USA	no	1	1	0	yes	USA	FLORIDA	1	0	0	0	0	0	0	0	FLORIDA	Suwannee County, north centre Florida	1		1	0	1	0	dust	1		0.931	3	1	0	0	1	0	1
EN	full	1979	Lottenberg, R., et al. (1979). "Pulmonary histoplasmosis associated with exploration of a bat cave."Am J Epidemiol110(2): 156-161.		1	18	USA		VOLUNTEER	0	0	0	1	volunteer	USA	no	1	1	0	yes	USA	FLORIDA	1	0	0	0	0	0	0	0	FLORIDA	Suwannee County, north centre Florida	1		1	0	1	0	dust	1		0.931	3	1	1	0	1	1	1
EN	full	2013	manolakos, cooray, patel, haider. Bats, fever and adenopathy – what is the link? Can j infect dis med microbiol 2013, 24; 1:35-37	1	0	20	CANADA	no		0	0	0	0		CENTRAL AMERICA	yes	0	1	0	no	CANADA	COSTA RICA	0	0	1	0	0	0	0	0	COSTA RICA	NR	1	1	1	0	1	0	dust	0	caso sporadico		4	1	1	1	1	0	1
EN	full	2014	Muller stover, tintelnot, richter, haussinger. A 55 year old woman with cough, fever, swelling of joints and exanthema after a trip to Ecuador. Internist 2014; 55:976-980	1	0	55	GERMANY	no		0	0	0	0		SOUTH AMERICA	yes	0	1	0	no	GERMANY	ECUADOR	0	0	0	1	0	0	0	0	ECUADOR	NR	4	1	0	0	1	0	no	0	caso sporadico		4	1	1	0	1	1	0
biblio	full	1957	murray et al. 1957. benign pulmonary histoplasmosis (cave disease) in South Africa. South afr med j 31: 245-253		1	22	EUROPE		TOURISM	0	1	0	0	student	SOUTH AFRICA	no	1	0	1	no		SOUTH AFRICA	0	0	0	0	1	0	0	0	SOUTH AFRICA	potgietersrust,	1		1	0	0	0	no	1		1	3	1	1	1	1	1	0
EN	full	1997	Nasta, P., et al. (1997). "Acute Histoplasmosis in Spelunkers Returning from Mato Grosso, Peru."J Travel Med4(4): 176-178.	4	1	25	ITALY	no	SPELEOLOGIST	1	0	0	0	speleologist	SOUTH AMERICA	yes	0	1	0	no	ITALY	PERU	0	0	0	1	0	0	0	0	PERU	mato grosso	1	1	1	1	0	0	no	1	4/4 (100%)	1	3	1	1	0	1	1	1
EN	full	2010	ohno et al, an outbreak of histoplasmosis among healthy young japanese women after traveling to South East Asia. Inter med 2010; 49:491-495	3	0	27	JAPAN	no	TOURISM	0	1	0	0	tourism	SOUTH EAST ASIA	no	1	0	1	no	JAPAN	MALAYSIA	0	0	0	0	0	1	1	0	MALAYSIA	langkawi island	4	1	0	0	1	0	NR	1	3/3	1	3	1	1	0	1	0	1
EN	full	2001	Olalla, J., et al. (2001). "[Acute pulmonary histoplasmosis after a journey to Peru]."Med Clin (Barc)116(17): 679.	1	1	34	SPAIN	no	TOURISM	0	1	0	0	tourism	SOUTH AMERICA	yes	0	1	0	no	SPAIN	PERU	0	0	0	1	0	0	0	0	PERU	NR	1	1	1	0	1	0	no	0	caso sporadico		4	1	1	0	1	1	0
EN	full	2014	Rocha-Silva, F., et al. (2014). "Histoplasmosis outbreak in Tamboril cave-Minas Gerais state, Brazil."Med Mycol Case Rep4: 1-4.	4	0	25	BRASIL		PROFESSIONAL	0	0	1	0	biologist	SOUTH AMERICA	yes	0	1	0	no	BRASIL	BRASIL	0	0	0	1	0	0	0	0	BRASIL	tamboril cave	1	0	1	0	0	1	no	1	4/4	1	3	1	1	0	0	0	0
EN	full	2014	Rocha-Silva, F., et al. (2014). "Histoplasmosis outbreak in Tamboril cave-Minas Gerais state, Brazil."Med Mycol Case Rep4: 1-4.		1	33	BRASIL		PROFESSIONAL	0	0	1	0	biologist	SOUTH AMERICA	yes	0	1	0	no	BRASIL	BRASIL	0	0	0	1	0	0	0	0	BRASIL	tamboril cave	1	0	1	0	0	1	no	1		1	3	1	1	0	0	0	0
EN	full	2014	Rocha-Silva, F., et al. (2014). "Histoplasmosis outbreak in Tamboril cave-Minas Gerais state, Brazil."Med Mycol Case Rep4: 1-4.		1	20	BRASIL		PROFESSIONAL	0	0	1	0	biologist	SOUTH AMERICA	yes	0	1	0	no	BRASIL	BRASIL	0	0	0	1	0	0	0	0	BRASIL	tamboril cave	1	0	1	0	0	1	no	1		1	3	1	1	0	0	0	0
biblio	full	1986	sacks et al. 1986 An outbreak and review of cave associated histoplasmosis capsulati. J med vet mycol 24: 313-317	5	1	26	USA	previous asbestus exposure	TOURISM	0	1	0	0	student	USA	no	1	1	0	yes	USA	FLORIDA	1	0	0	0	0	0	0	0	FLORIDA	NR	1		1	0	0	0	no	1	3/3	1	3	1	1	1	1	1	1
EN	full	2015	Salama A, et al. Coughing spells in a Michiganian girl after a trip to Southwest US. Pediatr Infect Dis J, 2015, May; 34(5): 546.	1	0	11	USA	no	TOURISM	0	1	0	0	tourism	USA	no	1	1	0	yes	michigan	USA	1	0	0	0	0	0	0	0	USA	southwest			0	0	1	0	yes	0	caso sporadico			1	0	0	1	1	1
EN	full	2003	Salomon, J., et al. (2003). "An outbreak of acute pulmonary histoplasmosis in members of a trekking trip in Martinique, French West Indies."J Travel Med10(2): 87-93.		1	64	FRANCE	smoker	PROFESSIONAL	0	0	1	0	professional travel	CENTRAL AMERICA	yes	0	1	0	no	FRANCE	MARTINIQUE	0	0	1	0	0	0	0	0	MARTINIQUE	NR	4	1	0	0	1	1	no	1		1	3	1	1	1	1	1	0
EN	full	2003	Salomon, J., et al. (2003). "An outbreak of acute pulmonary histoplasmosis in members of a trekking trip in Martinique, French West Indies."J Travel Med10(2): 87-93.	13	1	35	FRANCE	previous smoker, pneumothorax in 1972, pulmonary abscess in1983	PROFESSIONAL	0	0	1	0	professional travel	CENTRAL AMERICA	yes	0	1	0	no	FRANCE	MARTINIQUE	0	0	1	0	0	0	0	0	MARTINIQUE	NR	4	1	0	0	1	1	no	1	13/13 (100%)	1	3	1	1	1	1	1	1
EN	full	2003	Salomon, J., et al. (2003). "An outbreak of acute pulmonary histoplasmosis in members of a trekking trip in Martinique, French West Indies."J Travel Med10(2): 87-93.		1	35	FRANCE	no	PROFESSIONAL	0	0	1	0	professional travel	CENTRAL AMERICA	yes	0	1	0	no	FRANCE	MARTINIQUE	0	0	1	0	0	0	0	0	MARTINIQUE	NR	4	1	0	0	1	1	no	1		1	3	1	1	1	1	1	1
EN	full	2003	Salomon, J., et al. (2003). "An outbreak of acute pulmonary histoplasmosis in members of a trekking trip in Martinique, French West Indies."J Travel Med10(2): 87-93.		1	35	FRANCE	no	PROFESSIONAL	0	0	1	0	professional travel	CENTRAL AMERICA	yes	0	1	0	no	FRANCE	MARTINIQUE	0	0	1	0	0	0	0	0	MARTINIQUE	NR	4	1	0	0	1	1	no	1		1	3	1	1	1	1	1	0
EN	full	2003	Salomon, J., et al. (2003). "An outbreak of acute pulmonary histoplasmosis in members of a trekking trip in Martinique, French West Indies."J Travel Med10(2): 87-93.		1	35	FRANCE	no	PROFESSIONAL	0	0	1	0	professional travel	CENTRAL AMERICA	yes	0	1	0	no	FRANCE	MARTINIQUE	0	0	1	0	0	0	0	0	MARTINIQUE	NR	4	1	0	0	1	1	no	1		1	3	1	1	1	1	1	0
EN	full	2003	Salomon, J., et al. (2003). "An outbreak of acute pulmonary histoplasmosis in members of a trekking trip in Martinique, French West Indies."J Travel Med10(2): 87-93.		1	35	FRANCE	no	PROFESSIONAL	0	0	1	0	professional travel	CENTRAL AMERICA	yes	0	1	0	no	FRANCE	MARTINIQUE	0	0	1	0	0	0	0	0	MARTINIQUE	NR	4	1	0	0	1	1	no	1		1	3	1	1	1	1	1	1
EN	full	2003	Salomon, J., et al. (2003). "An outbreak of acute pulmonary histoplasmosis in members of a trekking trip in Martinique, French West Indies."J Travel Med10(2): 87-93.		0	35	FRANCE	no	PROFESSIONAL	0	0	1	0	professional travel	CENTRAL AMERICA	yes	0	1	0	no	FRANCE	MARTINIQUE	0	0	1	0	0	0	0	0	MARTINIQUE	NR	4	1	0	0	1	1	no	1		1	3	1	1	1	1	1	1
EN	full	2003	Salomon, J., et al. (2003). "An outbreak of acute pulmonary histoplasmosis in members of a trekking trip in Martinique, French West Indies."J Travel Med10(2): 87-93.		0	35	FRANCE	no	PROFESSIONAL	0	0	1	0	professional travel	CENTRAL AMERICA	yes	0	1	0	no	FRANCE	MARTINIQUE	0	0	1	0	0	0	0	0	MARTINIQUE	NR	4	1	0	0	1	1	no	1		1	3	1	1	1	1	1	1
EN	full	2003	Salomon, J., et al. (2003). "An outbreak of acute pulmonary histoplasmosis in members of a trekking trip in Martinique, French West Indies."J Travel Med10(2): 87-93.		0	35	FRANCE	smoker	PROFESSIONAL	0	0	1	0	professional travel	CENTRAL AMERICA	yes	0	1	0	no	FRANCE	MARTINIQUE	0	0	1	0	0	0	0	0	MARTINIQUE	NR	4	1	0	0	1	1	no	1		1	3	1	1	1	1	1	1
EN	full	2003	Salomon, J., et al. (2003). "An outbreak of acute pulmonary histoplasmosis in members of a trekking trip in Martinique, French West Indies."J Travel Med10(2): 87-93.		0	38	FRANCE	smoker	PROFESSIONAL	0	0	1	0	professional travel	CENTRAL AMERICA	yes	0	1	0	no	FRANCE	MARTINIQUE	0	0	1	0	0	0	0	0	MARTINIQUE	NR	4	1	0	0	1	1	no	1		1	3	1	1	1	1	1	1
EN	full	2003	Salomon, J., et al. (2003). "An outbreak of acute pulmonary histoplasmosis in members of a trekking trip in Martinique, French West Indies."J Travel Med10(2): 87-93.		0	35	FRANCE	smoker	PROFESSIONAL	0	0	1	0	professional travel	CENTRAL AMERICA	yes	0	1	0	no	FRANCE	MARTINIQUE	0	0	1	0	0	0	0	0	MARTINIQUE	NR	4	1	0	0	1	1	no	1		1	3	1	1	1	1	1	1
EN	full	2003	Salomon, J., et al. (2003). "An outbreak of acute pulmonary histoplasmosis in members of a trekking trip in Martinique, French West Indies."J Travel Med10(2): 87-93.		1	35	FRANCE	smoker, BPCO	PROFESSIONAL	0	0	1	0	professional travel	CENTRAL AMERICA	yes	0	1	0	no	FRANCE	MARTINIQUE	0	0	1	0	0	0	0	0	MARTINIQUE	NR	4	1	0	0	1	1	no	1		1	3	1	1	1	1	1	1
EN	full	2003	Salomon, J., et al. (2003). "An outbreak of acute pulmonary histoplasmosis in members of a trekking trip in Martinique, French West Indies."J Travel Med10(2): 87-93.		1	35	FRANCE	smoker, BPCO	PROFESSIONAL	0	0	1	0	professional travel	CENTRAL AMERICA	yes	0	1	0	no	FRANCE	MARTINIQUE	0	0	1	0	0	0	0	0	MARTINIQUE	NR	4	1	0	0	1	1	no	1		1	3	1	1	1	1	1	1
EN	full	2009	Schramm, N., et al. (2009). "[Biologist with cephalalgia and intermittend fever]."Radiologe49(1): 68-71.	1	0	42	GERMANY	no	PROFESSIONAL	0	0	1	0	biologist	CENTRAL AMERICA	yes	0	1	0	no	GERMANY	ANTILLE	0	0	1	0	0	0	0	0	ANTILLE	TRINIDAD	1	1	1	0	0	1	no	0	caso sporadico		4	1	1	0	1	1	0
EN	full	2011	senechal et al. Imported pulmonary histoplasmosis in three french cavers after a trip to cuba. J travel med 2012; 19:64-65	3	1	40	FRANCE	no	SPELEOLOGIST	1	0	0	0	speleologist	CENTRAL AMERICA	yes	0	1	0	no	FRANCE	CUBA	0	0	1	0	0	0	0	0	CUBA	sierra de los organos, west cuba: red ojo de agua, red rio blanco, cueva manuel noda, cueva del hojo del nodar	1	1	1	0	0	0	no	1	3/12	0.25	1	1	1	0	1	0	1
EN	full	2003	Weinberg, M., et al. (2003). "Severe histoplasmosis in travelers to Nicaragua."Emerg Infect Dis9(10): 1322-1325.	14	0	38	USA	no	TOURISM	0	1	0	0	student	CENTRAL AMERICA	yes	0	1	0	no	USA	NICARAGUA	0	0	1	0	0	0	0	0	NICARAGUA	NR	1	1	1	0	0	0	no	1	14/14 (100%)	1	3	1	1	1	1	1	0
EN	full	2003	Weinberg, M., et al. (2003). "Severe histoplasmosis in travelers to Nicaragua."Emerg Infect Dis9(10): 1322-1325.		0	38	USA	no	TOURISM	0	1	0	0	student	CENTRAL AMERICA	yes	0	1	0	no	USA	NICARAGUA	0	0	1	0	0	0	0	0	NICARAGUA	NR	1	1	1	0	0	0	no	1		1	3	1	1	1	1	1	0
EN	full	2003	Weinberg, M., et al. (2003). "Severe histoplasmosis in travelers to Nicaragua."Emerg Infect Dis9(10): 1322-1325.		0	38	USA	no	TOURISM	0	1	0	0	student	CENTRAL AMERICA	yes	0	1	0	no	USA	NICARAGUA	0	0	1	0	0	0	0	0	NICARAGUA	NR	1	1	1	0	0	0	no	1		1	3	1	1	1	1	1	0
EN	full	2003	Weinberg, M., et al. (2003). "Severe histoplasmosis in travelers to Nicaragua."Emerg Infect Dis9(10): 1322-1325.		0	38	USA	no	TOURISM	0	1	0	0	student	CENTRAL AMERICA	yes	0	1	0	no	USA	NICARAGUA	0	0	1	0	0	0	0	0	NICARAGUA	NR	1	1	1	0	0	0	no	1		1	3	1	1	1	1	1	0
EN	full	1966	Wyborney, V. J., et al. (1966). "Histoplasmosis. A review of three cases studied in San Diego County."Calif Med105(4): 265-270.	2	0	9	USA	no	TOURISM	0	1	0	0		USA	no	1	1	0	yes	USA	MISSOURI	1	0	0	0	0	0	0	0	MISSOURI	kansas city	3		0	1	0	0	no	0	caso sporadico		4	1	1	0	1	1	0
EN	full	2010	Zollner et al. Clinical and evolutionary characteristics of four patients with pulmonary histoplasmosis reported in the Paraiba Paulista Valley Region. Zollner et al, Rev Soc Bras Med Trop 43(5); 599-601.	4	1	13															BRASIL	BRASIL	0	0	0	1	0	0	0	0	0	0	0	0	1	0	0	0		0	caso sporadico			1	1	0	0	0	0
EN	full	2010	Zollner et al. Clinical and evolutionary characteristics of four patients with pulmonary histoplasmosis reported in the Paraiba Paulista Valley Region. Zollner et al, Rev Soc Bras Med Trop 43(5); 599-601.		1	45															BRASIL	BRASIL	0	0	0	1	0	0	0	0				0	1	0	0	0		0	caso sporadico			1	1	0	0	0	0
EN	full	2010	Zollner et al. Clinical and evolutionary characteristics of four patients with pulmonary histoplasmosis reported in the Paraiba Paulista Valley Region. Zollner et al, Rev Soc Bras Med Trop 43(5); 599-601.		1	32															BRASIL	BRASIL	0	0	0	1	0	0	0	0				0	1	0	0	0		0	caso sporadico			1	1	0	0	0	0
NEGRAR	23	2006		ZC	0	31	ITALY	no	TOURISM	0	1	0	0	tourism	SOUTH AMERICA	yes	0	1	0	no	ITALY	ECUADOR	0	0	0	1	0	0	0	0	ECUADOR		4	1	0	0	1	0	no	1		0.708	2	1	1		0	0	0
NEGRAR	10	2006		FL	1	40	ITALY	no	TOURISM	0	1	0	0	tourism	SOUTH AMERICA	yes	0	1	0	no	ITALY	ECUADOR	0	0	0	1	0	0	0	0	ECUADOR		4	1	0	0	1	1	no	1		0.708	2	1	1		1	1	0
NEGRAR	20	2006		VL	1	56	ITALY	no	TOURISM	0	1	0	0	tourism	SOUTH AMERICA	yes	0	1	0	no	ITALY	ECUADOR	0	0	0	1	0	0	0	0	ECUADOR		4	1	0	0	1	0	no	1		0.708	2	1	1		0	0	0
NEGRAR	26	2011		PC	1	56	ITALY	no	PROFESSIONAL	0	0	1	0	Meccanico...?	SOUTH AMERICA	yes	0	1	0	no	ITALY	ECUADOR	0	0	0	1	0	0	0	0	BOLIVIA		4	1	0	0	1	1	no	0	caso sporadico		4	1	1		0	0
NEGRAR	22	2006		BS	1	57	ITALY	no	TOURISM	0	1	0	0	tourism	SOUTH AMERICA	yes	0	1	0	no	ITALY	ECUADOR	0	0	0	1	0	0	0	0	ECUADOR		4	1	0	0	1	0	no	1		0.708	2	1	1	1	1	1	0
NEGRAR	31	2012		ZN	1	71	ITALY	linfocele paraortico	SPELEOLOGIST	1	0	0	0	speleologo	CENTRAL AMERICA	yes	0	1	0	no	ITALY	ECUADOR	0	0	1	0	0	0	0	0	CUBA		1	1	1	0	0	0	no	0	caso sporadico		4	1	1	1	1	0
NEGRAR	15	2006		ZD	1	50	ITALY	cataratta congenita stellata	TOURISM	0	1	0	0	tourism	SOUTH AMERICA	yes	0	1	0	no	ITALY	BOLIVIA	0	0	0	1	0	0	0	0	ECUADOR		4	1	0	0	1	1	no	1		0.708	2	1	0		1	0	0
NEGRAR	6	2006		PG	0	24	ITALY	no	TOURISM	0	1	0	0	tourism	SOUTH AMERICA	yes	0	1	0	no	ITALY	MEXICO	0	0	0	1	0	0	0	0	ECUADOR		4	1	0	0	1	1	no	1		0.708	2	1	1		0	0	0
NEGRAR	29	2008		IM	1	36	ITALY	no	SPELEOLOGIST	1	0	0	0	speleologo	NORTH AMERICA	yes	0	1	0	yes	ITALY	MEXICO	0	1	0	0	0	0	0	0	MEXICO		1	1	1	0	0	0	no	0	caso sporadico		4	1	1		1	1
NEGRAR	27	2014		MP	1	32	ITALY	no	PROFESSIONAL	0	0	1	0	ripristino ambientale/speleologo	NORTH AMERICA	yes	0	1	0	yes	ITALY	CUBA	0	1	0	0	0	0	0	0	MEXICO		1	1	1	0	0	1	no	0	caso sporadico		4	1	1		1	1
NEGRAR	21	2006		FL	0	24	ITALY	no	TOURISM	0	1	0	0	tourism	SOUTH AMERICA	yes	0	1	0	no	ITALY	ECUADOR	0	0	0	1	0	0	0	0	ECUADOR		4	1	0	0	1	0	no	1		0.708	2	1	1		1	1	0
NEGRAR	17	2006		TF	1	52	ITALY	asma	TOURISM	0	1	0	0	tourism	SOUTH AMERICA	yes	0	1	0	no	ITALY	ECUADOR	0	0	0	1	0	0	0	0	ECUADOR		4	1	0	0	1	1	no	1		0.708	2	1	0		1	0	0
NEGRAR	3	2006		BS	1	31	ITALY	no	TOURISM	0	1	0	0	tourism	SOUTH AMERICA	yes	0	1	0	no	ITALY	ECUADOR	0	0	0	1	0	0	0	0	ECUADOR		4	1	0	0	1	1	no	1		0.708	2	1	0		0	0	0
NEGRAR	5	2006		BR	1	54	ITALY	no	TOURISM	0	1	0	0	tourism	SOUTH AMERICA	yes	0	1	0	no	ITALY	ECUADOR	0	0	0	1	0	0	0	0	ECUADOR		4	1	0	0	1	1	no	1		0.708	2	1	1		1	1	0
NEGRAR	11	2006		FV	0	23	ITALY	no	TOURISM	0	1	0	0	tourism	SOUTH AMERICA	yes	0	1	0	no	ITALY	ECUADOR	0	0	0	1	0	0	0	0	ECUADOR		4	1	0	0	1	1	no	1		0.708	2	1	0		0	0	0
NEGRAR	1	2006		SM	0	26	ITALY	previous asma	TOURISM	0	1	0	0	tourism	SOUTH AMERICA	yes	0	1	0	no	ITALY	ECUADOR	0	0	0	1	0	0	0	0	ECUADOR		4	1	0	0	1	1	no	1	17/24 (70,8%)	0.708	2	1	0		0	0	0
NEGRAR	7	2006		GM	0	56	ITALY	no	TOURISM	0	1	0	0	tourism	SOUTH AMERICA	yes	0	1	0	no	ITALY	ECUADOR	0	0	0	1	0	0	0	0	ECUADOR		4	1	0	0	1	1	no	1		0.708	2	1	1		0	0	0
EN	full	1999	Valdez, H. and R. A. Salata (1999). "Bat-associated histoplasmosis in returning travelers: case presentation and description of a cluster."J Travel Med6(4): 258-260.				USA		TOURISM	0	1	0	0	student	SOUTH AMERICA	yes	0	1	0	no	USA	ECUADOR	0	0	0	1	0	0	0	0	ECUADOR	cave near atacame, 25 km south of the city of esmeraldas	1	1	1	0	0	0	no	1		0.6471	2	0	0	1	1	0	1
EN	full	1992	Berwanger, I., et al. (1992). "[The solitary pulmonary histoplasmoma]."Dtsch Med Wochenschr117(33): 1232-1236.	1	1	63	GERMANY	previous smoker	TOURISM	0	1	0	0	tourism	SOUTH AMERICA	yes	0	1	0	no	GERMANY	ECUADOR	0	0	0	1	0	0	0	0	ECUADOR	NR	4	1	0	0	1	0	no	0	caso sporadico		4	1	0	0	1	1	0
EN	full	1997	Cuguilliere, A., et al. (1997). "[Tumor form of histoplasmosis in subjects returning from French Guiana. Treatment of an immunocompetent patient]."Presse Med26(36): 1724.	1	1	20	FRANCE	no	PROFESSIONAL	0	0	1	0	soldier	SOUTH AMERICA	yes	0	1	0	no	FRANCE	GUYANA	0	0	0	1	0	0	0	0	GUYANA	NR	4	1	0	0	1	1	NR	0	caso sporadico		4	1	1	0	1	1	0
EN	full	2006	de vries et al. Acute pulmonary histoplasmosis from Ghana. Travel med infect dis 2006 Sep; 4(5): 286-9	1	1	38	NETHERLANDS	no	TOURISM	0	1	0	0	tourism	AFRICA	no	1	0	1	no	NETHERLANDS	GHANA	0	0	0	0	1	0	0	0	GHANA	water falls of Wli, Upper Volta	1	1	1	0	1	0	river water	0	caso sporadico		4	1	1	1	1	1	0
EN	full	2012	ehrhardt, tintelnot,kremsner, frank. Progressive malaise and joint pain after a travel to costa rica. Dtsch med Wochenschr. 2012 nov; 137(44):2260	1	1	57	GERMANY		TOURISM	0	1	0	0	tourism	CENTRAL AMERICA	yes	0	1	0	no	GERMANY	COSTA RICA	0	0	1	0	0	0	0	0	COSTA RICA	NR	1	1	1	0	1	0	no	0	caso sporadico		4	1	0	0	0	0	0
EN	full	2002	Erkens, K., et al. (2002). "[Histoplasmosis group disease in bat researchers returning from Cuba]."Dtsch Med Wochenschr127(1-2): 21-25.	6	1	31	GERMANY		PROFESSIONAL	0	0	1	0	biologist	CENTRAL AMERICA	yes	0	1	0	no	GERMANY	CUBA	0	0	1	0	0	0	0	0	CUBA	NR	1	1	1	0	0	1	no	1	6/8	0.75	3	1	1	0	1	0	1
EN	full	2002	Erkens, K., et al. (2002). "[Histoplasmosis group disease in bat researchers returning from Cuba]."Dtsch Med Wochenschr127(1-2): 21-25.		0	26	GERMANY		PROFESSIONAL	0	0	1	0	biologist	CENTRAL AMERICA	yes	0	1	0	no	GERMANY	CUBA	0	0	1	0	0	0	0	0	CUBA	NR	1	1	1	0	0	1	no	1		0.75	3	1	1	0	1	0	1
EN	full	2002	Erkens, K., et al. (2002). "[Histoplasmosis group disease in bat researchers returning from Cuba]."Dtsch Med Wochenschr127(1-2): 21-25.			25	GERMANY		PROFESSIONAL	0	0	1	0	biologist	CENTRAL AMERICA	yes	0	1	0	no	GERMANY	CUBA	0	0	1	0	0	0	0	0	CUBA	NR	1	1	1	0	0	1	no	1		0.75	3	1	1	0	1	0	1
EN	full	2000	Farina, C., et al. (2000). "Imported and autochthonous histoplasmosis in Bergamo province, Northern Italy."Scand J Infect Dis32(3): 271-274.		1	22	ITALY	no	TOURISM	0	1	0	0	tourism	CENTRAL AMERICA	yes	0	1	0	no	ITALY	DOMINICAN REPUBLIC	0	0	1	1	0	0	0	0	GUATEMALA	NR	4	1	0	0	1	0	NR	0	caso sporadico		4	1	1	0	1	1	0
EN	full	2003	Flor, A., et al. (2003). "[Acute pulmonary histoplasmosis in a Spanish traveller to Nicaragua: an imported disease case]."Rev Iberoam Micol20(1): 24-28.	3	1	21	SPAIN	no	TOURISM	0	1	0	0	tourism	CENTRAL AMERICA	yes	0	1	0	no	SPAIN	NICARAGUA	0	0	1	0	0	0	0	0	NICARAGUA	NR	1	1	1	0	1	0	mine	1	3/3	1	3	1	1	0	1	1	0
EN	full	2000	Gascon, J., et al. (2000). "Imported histoplasmosis in Spain."J Travel Med7(2): 89-91.				SPAIN		VOLUNTEER	0	0	0	0	volunteer	CENTRAL AMERICA	yes	0	1	0	no	SPAIN	GUATEMALA	0	0	1	0	0	0	0	0	GUATEMALA	NR	4	1	0	0	1	1	dust	1	2/2	1	3	1	1	0	1	1	1
EN	full	2000	Gascon, J., et al. (2000). "Imported histoplasmosis in Spain."J Travel Med7(2): 89-91.				SPAIN		TOURISM	0	1	0	0	tourism	CENTRAL AMERICA	yes	0	1	0	no	SPAIN	COLOMBIA	0	0	1	1	0	0	0	0	NICARAGUA	NR	4	1	0	0	1	0	dust	0	caso sporadico		4	1	1	0	1	1	0
biblio	full	1962	gelfand M. 1962. cave disease. A report of three cases from southern rhodesia. Centr afr j med, 8: 461-6		1	37	EUROPE	no	SPELEOLOGIST	1	0	0	0	speleologist	SOUTH AFRICA	no	1	0	1	no	EUROPE	SOUTH AFRICA	0	0	0	0	1	0	0	0	SOUTH AFRICA	ulster cave, sinoia,	1	1	1	0	0	0	no	1		0.25	1	1	1	1	1	0	0
biblio	full	1962	gelfand M. 1962. cave disease. A report of three cases from southern rhodesia. Centr afr j med, 8: 461-6		1	27	EUROPE	no	SPELEOLOGIST	1	0	0	0	speleologist	SOUTH AFRICA	no	1	0	1	no	EUROPE	SOUTH AFRICA	0	0	0	0	1	0	0	0	SOUTH AFRICA	ulster cave, sinoia,	1	1	1	0	0	0	no	1		0.25	1	1	1	1	1	1	0
biblio	full	1990	guigay et al, un complexe ganglio pulmonaire particulier. Rev Pneumol Clin 1990, 46: 277-279	1	1	28	FRANCE	smoker	TOURISM	0	1	0	0	tourism	SOUTH AMERICA	yes	0	1	0	no	FRANCE	GUYANA	0	0	0	1	0	0	0	0	GUYANA	NR	4	1	0	0	1	0	no	0	caso sporadico		4	1	1	0	1	0	0
EN	full	1981	Gustafson, T. L., et al. (1981). "Outbreak of acute pulmonary histoplasmosis in members of a wagon train."Am J Med71(5): 759-765.		1	<21	USA	no	TOURISM	0	1	0	0		USA	no	1	1	0	yes	USA	SOUTH CAROLINA	1	0	0	0	0	0	0	0	SOUTH CAROLINA	charleston	3	0	0	1	0	0	no	1		0.8118	3	1	1	0	1	1	0
EN	full	1981	Gustafson, T. L., et al. (1981). "Outbreak of acute pulmonary histoplasmosis in members of a wagon train."Am J Med71(5): 759-765.		1	<21	USA	no	TOURISM	0	1	0	0		USA	no	1	1	0	yes	USA	SOUTH CAROLINA	1	0	0	0	0	0	0	0	SOUTH CAROLINA	charleston	3	0	0	1	0	0	no	1		0.8118	3	1	1	0	1	1	0
EN	full	1981	Gustafson, T. L., et al. (1981). "Outbreak of acute pulmonary histoplasmosis in members of a wagon train."Am J Med71(5): 759-765.		1	<21	USA	no	TOURISM	0	1	0	0		USA	no	1	1	0	yes	USA	SOUTH CAROLINA	1	0	0	0	0	0	0	0	SOUTH CAROLINA	charleston	3	0	0	1	0	0	no	1		0.8118	3	1	1	0	1	1	0
EN	full	1981	Gustafson, T. L., et al. (1981). "Outbreak of acute pulmonary histoplasmosis in members of a wagon train."Am J Med71(5): 759-765.		0	>21	USA	no	TOURISM	0	1	0	0		USA	no	1	1	0	yes	USA	SOUTH CAROLINA	1	0	0	0	0	0	0	0	SOUTH CAROLINA	charleston	3	0	0	1	0	0	no	1		0.8118	3	1	1	0	1	1	0
EN	full	1981	Gustafson, T. L., et al. (1981). "Outbreak of acute pulmonary histoplasmosis in members of a wagon train."Am J Med71(5): 759-765.		1	>21	USA	no	TOURISM	0	1	0	0		USA	no	1	1	0	yes	USA	SOUTH CAROLINA	1	0	0	0	0	0	0	0	SOUTH CAROLINA	charleston	3	0	0	1	0	0	no	1		0.8118	3	1	1	0	1	0	0
EN	full	1981	Gustafson, T. L., et al. (1981). "Outbreak of acute pulmonary histoplasmosis in members of a wagon train."Am J Med71(5): 759-765.		1	<21	USA	no	TOURISM	0	1	0	0		USA	no	1	1	0	yes	USA	SOUTH CAROLINA	1	0	0	0	0	0	0	0	SOUTH CAROLINA	charleston	3	0	0	1	0	0	no	1		0.8118	3	1	0	0	0	0	0
EN	full	1981	Gustafson, T. L., et al. (1981). "Outbreak of acute pulmonary histoplasmosis in members of a wagon train."Am J Med71(5): 759-765.		1	<21	USA	no	TOURISM	0	1	0	0		USA	no	1	1	0	yes	USA	SOUTH CAROLINA	1	0	0	0	0	0	0	0	SOUTH CAROLINA	charleston	3	0	0	1	0	0	no	1		0.8118	3	1	0	0	0	0	0
EN	full	1981	Gustafson, T. L., et al. (1981). "Outbreak of acute pulmonary histoplasmosis in members of a wagon train."Am J Med71(5): 759-765.		1	<21	USA	no	TOURISM	0	1	0	0		USA	no	1	1	0	yes	USA	SOUTH CAROLINA	1	0	0	0	0	0	0	0	SOUTH CAROLINA	charleston	3	0	0	1	0	0	no	1		0.8118	3	1	0	0	0	0	0
EN	full	1981	Gustafson, T. L., et al. (1981). "Outbreak of acute pulmonary histoplasmosis in members of a wagon train."Am J Med71(5): 759-765.		1	<21	USA	no	TOURISM	0	1	0	0		USA	no	1	1	0	yes	USA	SOUTH CAROLINA	1	0	0	0	0	0	0	0	SOUTH CAROLINA	charleston	3	0	0	1	0	0	no	1		0.8118	3	1	0	0	0	0	0
EN	full	1981	Gustafson, T. L., et al. (1981). "Outbreak of acute pulmonary histoplasmosis in members of a wagon train."Am J Med71(5): 759-765.		1	<21	USA	no	TOURISM	0	1	0	0		USA	no	1	1	0	yes	USA	SOUTH CAROLINA	1	0	0	0	0	0	0	0	SOUTH CAROLINA	charleston	3	0	0	1	0	0	no	1		0.8118	3	1	0	0	0	0	0
EN	full	1981	Gustafson, T. L., et al. (1981). "Outbreak of acute pulmonary histoplasmosis in members of a wagon train."Am J Med71(5): 759-765.		1	<21	USA	smoker	TOURISM	0	1	0	0		USA	no	1	1	0	yes	USA	SOUTH CAROLINA	1	0	0	0	0	0	0	0	SOUTH CAROLINA	charleston	3	0	0	1	0	0	no	1		0.8118	3	1	1	0	1	0	0
EN	full	1981	Gustafson, T. L., et al. (1981). "Outbreak of acute pulmonary histoplasmosis in members of a wagon train."Am J Med71(5): 759-765.		1	<21	USA	smoker	TOURISM	0	1	0	0		USA	no	1	1	0	yes	USA	SOUTH CAROLINA	1	0	0	0	0	0	0	0	SOUTH CAROLINA	charleston	3	0	0	1	0	0	no	1		0.8118	3	1	1	0	1	0	0
EN	full	1981	Gustafson, T. L., et al. (1981). "Outbreak of acute pulmonary histoplasmosis in members of a wagon train."Am J Med71(5): 759-765.		0	<21	USA	smoker	TOURISM	0	1	0	0		USA	no	1	1	0	yes	USA	SOUTH CAROLINA	1	0	0	0	0	0	0	0	SOUTH CAROLINA	charleston	3	0	0	1	0	0	no	1		0.8118	3	1	1	0	1	0	0
EN	full	1981	Gustafson, T. L., et al. (1981). "Outbreak of acute pulmonary histoplasmosis in members of a wagon train."Am J Med71(5): 759-765.		1	<21	USA	smoker	TOURISM	0	1	0	0		USA	no	1	1	0	yes	USA	SOUTH CAROLINA	1	0	0	0	0	0	0	0	SOUTH CAROLINA	charleston	3	0	0	1	0	0	no	1		0.8118	3	1	1	0	0	0	0
EN	full	1981	Gustafson, T. L., et al. (1981). "Outbreak of acute pulmonary histoplasmosis in members of a wagon train."Am J Med71(5): 759-765.		1	<21	USA	smoker	TOURISM	0	1	0	0		USA	no	1	1	0	yes	USA	SOUTH CAROLINA	1	0	0	0	0	0	0	0	SOUTH CAROLINA	charleston	3	0	0	1	0	0	no	1		0.8118	3	1	1	0	0	0	0
EN	full	1981	Gustafson, T. L., et al. (1981). "Outbreak of acute pulmonary histoplasmosis in members of a wagon train."Am J Med71(5): 759-765.		1	<21	USA	smoker	TOURISM	0	1	0	0		USA	no	1	1	0	yes	USA	SOUTH CAROLINA	1	0	0	0	0	0	0	0	SOUTH CAROLINA	charleston	3	0	0	1	0	0	no	1		0.8118	3	1	1	0	0	0	0
EN	full	1981	Gustafson, T. L., et al. (1981). "Outbreak of acute pulmonary histoplasmosis in members of a wagon train."Am J Med71(5): 759-765.		1	<21	USA	smoker	TOURISM	0	1	0	0		USA	no	1	1	0	yes	USA	SOUTH CAROLINA	1	0	0	0	0	0	0	0	SOUTH CAROLINA	charleston	3	0	0	1	0	0	no	1		0.8118	3	1	1	0	0	0	0
EN	full	1981	Gustafson, T. L., et al. (1981). "Outbreak of acute pulmonary histoplasmosis in members of a wagon train."Am J Med71(5): 759-765.		1	<21	USA	smoker	TOURISM	0	1	0	0		USA	no	1	1	0	yes	USA	SOUTH CAROLINA	1	0	0	0	0	0	0	0	SOUTH CAROLINA	charleston	3	0	0	1	0	0	no	1		0.8118	3	1	1	0	0	0	0
EN	full	1981	Gustafson, T. L., et al. (1981). "Outbreak of acute pulmonary histoplasmosis in members of a wagon train."Am J Med71(5): 759-765.		1	<21	USA	smoker	TOURISM	0	1	0	0		USA	no	1	1	0	yes	USA	SOUTH CAROLINA	1	0	0	0	0	0	0	0	SOUTH CAROLINA	charleston	3	0	0	1	0	0	no	1		0.8118	3	1	1	0	0	0	0
EN	full	1981	Gustafson, T. L., et al. (1981). "Outbreak of acute pulmonary histoplasmosis in members of a wagon train."Am J Med71(5): 759-765.		1	>21	USA	smoker	TOURISM	0	1	0	0		USA	no	1	1	0	yes	USA	SOUTH CAROLINA	1	0	0	0	0	0	0	0	SOUTH CAROLINA	charleston	3	0	0	1	0	0	no	1		0.8118	3	1	0	0	0	0	0
EN	full	1981	Gustafson, T. L., et al. (1981). "Outbreak of acute pulmonary histoplasmosis in members of a wagon train."Am J Med71(5): 759-765.		1	>21	USA	smoker	TOURISM	0	1	0	0		USA	no	1	1	0	yes	USA	SOUTH CAROLINA	1	0	0	0	0	0	0	0	SOUTH CAROLINA	charleston	3	0	0	1	0	0	no	1		0.8118	3	1	0	0	0	0	0
EN	full	1981	Gustafson, T. L., et al. (1981). "Outbreak of acute pulmonary histoplasmosis in members of a wagon train."Am J Med71(5): 759-765.	69	0	>21	USA	smoker		0	0	0	0		USA	no	1	1	0	yes	USA	SOUTH CAROLINA	1	0	0	0	0	0	0	0	SOUTH CAROLINA	charleston	3	0	0	1	0	0	no	1	69/85 (81%)	0.8118	3	1	1	0	1	1	0
EN	full	1981	Gustafson, T. L., et al. (1981). "Outbreak of acute pulmonary histoplasmosis in members of a wagon train."Am J Med71(5): 759-765.		1	<21	USA	no	TOURISM	0	1	0	0		USA	no	1	1	0	yes	USA	SOUTH CAROLINA	1	0	0	0	0	0	0	0	SOUTH CAROLINA	charleston	3	0	0	1	0	0	no	1		0.8118	3	1	1	0	1	1	0
EN	full	1981	Gustafson, T. L., et al. (1981). "Outbreak of acute pulmonary histoplasmosis in members of a wagon train."Am J Med71(5): 759-765.		1	<21	USA	no	TOURISM	0	1	0	0		USA	no	1	1	0	yes	USA	SOUTH CAROLINA	1	0	0	0	0	0	0	0	SOUTH CAROLINA	charleston	3	0	0	1	0	0	no	1		0.8118	3	1	1	0	1	1	0
EN	full	1981	Gustafson, T. L., et al. (1981). "Outbreak of acute pulmonary histoplasmosis in members of a wagon train."Am J Med71(5): 759-765.		0	<21	USA	no	TOURISM	0	1	0	0		USA	no	1	1	0	yes	USA	SOUTH CAROLINA	1	0	0	0	0	0	0	0	SOUTH CAROLINA	charleston	3	0	0	1	0	0	no	1		0.8118	3	1	1	0	1	1	0
EN	full	1981	Gustafson, T. L., et al. (1981). "Outbreak of acute pulmonary histoplasmosis in members of a wagon train."Am J Med71(5): 759-765.		0	<21	USA	no	TOURISM	0	1	0	0		USA	no	1	1	0	yes	USA	SOUTH CAROLINA	1	0	0	0	0	0	0	0	SOUTH CAROLINA	charleston	3	0	0	1	0	0	no	1		0.8118	3	1	1	0	1	1	0
EN	full	1981	Gustafson, T. L., et al. (1981). "Outbreak of acute pulmonary histoplasmosis in members of a wagon train."Am J Med71(5): 759-765.		0	>21	USA	no	TOURISM	0	1	0	0		USA	no	1	1	0	yes	USA	SOUTH CAROLINA	1	0	0	0	0	0	0	0	SOUTH CAROLINA	charleston	3	0	0	1	0	0	no	1		0.8118	3	1	1	0	1	1	0
EN	full	1981	Gustafson, T. L., et al. (1981). "Outbreak of acute pulmonary histoplasmosis in members of a wagon train."Am J Med71(5): 759-765.		0	>21	USA	no	TOURISM	0	1	0	0		USA	no	1	1	0	yes	USA	SOUTH CAROLINA	1	0	0	0	0	0	0	0	SOUTH CAROLINA	charleston	3	0	0	1	0	0	no	1		0.8118	3	1	1	0	1	1	0
EN	full	1981	Gustafson, T. L., et al. (1981). "Outbreak of acute pulmonary histoplasmosis in members of a wagon train."Am J Med71(5): 759-765.		1	>21	USA	no	TOURISM	0	1	0	0		USA	no	1	1	0	yes	USA	SOUTH CAROLINA	1	0	0	0	0	0	0	0	SOUTH CAROLINA	charleston	3	0	0	1	0	0	no	1		0.8118	3	1	1	0	1	1	0
EN	full	1981	Gustafson, T. L., et al. (1981). "Outbreak of acute pulmonary histoplasmosis in members of a wagon train."Am J Med71(5): 759-765.		1	>21	USA	no	TOURISM	0	1	0	0		USA	no	1	1	0	yes	USA	SOUTH CAROLINA	1	0	0	0	0	0	0	0	SOUTH CAROLINA	charleston	3	0	0	1	0	0	no	1		0.8118	3	1	1	0	1	1	0
EN	full	1981	Gustafson, T. L., et al. (1981). "Outbreak of acute pulmonary histoplasmosis in members of a wagon train."Am J Med71(5): 759-765.		1	<21	USA	no	TOURISM	0	1	0	0		USA	no	1	1	0	yes	USA	SOUTH CAROLINA	1	0	0	0	0	0	0	0	SOUTH CAROLINA	charleston	3	0	0	1	0	0	no	1		0.8118	3	1	1	0	1	1	0
EN	full	1981	Gustafson, T. L., et al. (1981). "Outbreak of acute pulmonary histoplasmosis in members of a wagon train."Am J Med71(5): 759-765.		1	<21	USA	no	TOURISM	0	1	0	0		USA	no	1	1	0	yes	USA	SOUTH CAROLINA	1	0	0	0	0	0	0	0	SOUTH CAROLINA	charleston	3	0	0	1	0	0	no	1		0.8118	3	1	1	0	1	1	0
EN	full	1981	Gustafson, T. L., et al. (1981). "Outbreak of acute pulmonary histoplasmosis in members of a wagon train."Am J Med71(5): 759-765.		1	<21	USA	no	TOURISM	0	1	0	0		USA	no	1	1	0	yes	USA	SOUTH CAROLINA	1	0	0	0	0	0	0	0	SOUTH CAROLINA	charleston	3	0	0	1	0	0	no	1		0.8118	3	1	1	0	1	1	0
EN	full	1981	Gustafson, T. L., et al. (1981). "Outbreak of acute pulmonary histoplasmosis in members of a wagon train."Am J Med71(5): 759-765.		1	<21	USA	no	TOURISM	0	1	0	0		USA	no	1	1	0	yes	USA	SOUTH CAROLINA	1	0	0	0	0	0	0	0	SOUTH CAROLINA	charleston	3	0	0	1	0	0	no	1		0.8118	3	1	1	0	1	1	0
EN	full	1981	Gustafson, T. L., et al. (1981). "Outbreak of acute pulmonary histoplasmosis in members of a wagon train."Am J Med71(5): 759-765.		0	>21	USA	no	TOURISM	0	1	0	0		USA	no	1	1	0	yes	USA	SOUTH CAROLINA	1	0	0	0	0	0	0	0	SOUTH CAROLINA	charleston	3	0	0	1	0	0	no	1		0.8118	3	1	1	0	1	1	0
EN	full	1981	Gustafson, T. L., et al. (1981). "Outbreak of acute pulmonary histoplasmosis in members of a wagon train."Am J Med71(5): 759-765.		1	<21	USA	smoker	TOURISM	0	1	0	0		USA	no	1	1	0	yes	USA	SOUTH CAROLINA	1	0	0	0	0	0	0	0	SOUTH CAROLINA	charleston	3	0	0	1	0	0	no	1		0.8118	3	1	1	0	1	1	0
EN	full	1981	Gustafson, T. L., et al. (1981). "Outbreak of acute pulmonary histoplasmosis in members of a wagon train."Am J Med71(5): 759-765.		1	<21	USA	smoker	TOURISM	0	1	0	0		USA	no	1	1	0	yes	USA	SOUTH CAROLINA	1	0	0	0	0	0	0	0	SOUTH CAROLINA	charleston	3	0	0	1	0	0	no	1		0.8118	3	1	1	0	1	1	0
EN	full	1981	Gustafson, T. L., et al. (1981). "Outbreak of acute pulmonary histoplasmosis in members of a wagon train."Am J Med71(5): 759-765.		1	<21	USA	smoker	TOURISM	0	1	0	0		USA	no	1	1	0	yes	USA	SOUTH CAROLINA	1	0	0	0	0	0	0	0	SOUTH CAROLINA	charleston	3	0	0	1	0	0	no	1		0.8118	3	1	1	0	1	1	0
EN	full	1981	Gustafson, T. L., et al. (1981). "Outbreak of acute pulmonary histoplasmosis in members of a wagon train."Am J Med71(5): 759-765.		0	<21	USA	smoker	TOURISM	0	1	0	0		USA	no	1	1	0	yes	USA	SOUTH CAROLINA	1	0	0	0	0	0	0	0	SOUTH CAROLINA	charleston	3	0	0	1	0	0	no	1		0.8118	3	1	1	0	1	1	0
EN	full	1981	Gustafson, T. L., et al. (1981). "Outbreak of acute pulmonary histoplasmosis in members of a wagon train."Am J Med71(5): 759-765.		0	>21	USA	smoker	TOURISM	0	1	0	0		USA	no	1	1	0	yes	USA	SOUTH CAROLINA	1	0	0	0	0	0	0	0	SOUTH CAROLINA	charleston	3	0	0	1	0	0	no	1		0.8118	3	1	1	0	1	1	0
EN	full	1981	Gustafson, T. L., et al. (1981). "Outbreak of acute pulmonary histoplasmosis in members of a wagon train."Am J Med71(5): 759-765.		0	>21	USA	smoker	TOURISM	0	1	0	0		USA	no	1	1	0	yes	USA	SOUTH CAROLINA	1	0	0	0	0	0	0	0	SOUTH CAROLINA	charleston	3	0	0	1	0	0	no	1		0.8118	3	1	1	0	1	1	0
EN	full	1981	Gustafson, T. L., et al. (1981). "Outbreak of acute pulmonary histoplasmosis in members of a wagon train."Am J Med71(5): 759-765.		0	>21	USA	smoker	TOURISM	0	1	0	0		USA	no	1	1	0	yes	USA	SOUTH CAROLINA	1	0	0	0	0	0	0	0	SOUTH CAROLINA	charleston	3	0	0	1	0	0	no	1		0.8118	3	1	1	0	1	1	0
EN	full	1981	Gustafson, T. L., et al. (1981). "Outbreak of acute pulmonary histoplasmosis in members of a wagon train."Am J Med71(5): 759-765.		1	>21	USA	smoker	TOURISM	0	1	0	0		USA	no	1	1	0	yes	USA	SOUTH CAROLINA	1	0	0	0	0	0	0	0	SOUTH CAROLINA	charleston	3	0	0	1	0	0	no	1		0.8118	3	1	1	0	1	1	0
EN	full	1981	Gustafson, T. L., et al. (1981). "Outbreak of acute pulmonary histoplasmosis in members of a wagon train."Am J Med71(5): 759-765.		1	<21	USA	smoker	TOURISM	0	1	0	0		USA	no	1	1	0	yes	USA	SOUTH CAROLINA	1	0	0	0	0	0	0	0	SOUTH CAROLINA	charleston	3	0	0	1	0	0	no	1		0.8118	3	1	1	0	1	1	0
EN	full	1981	Gustafson, T. L., et al. (1981). "Outbreak of acute pulmonary histoplasmosis in members of a wagon train."Am J Med71(5): 759-765.		1	<21	USA	smoker	TOURISM	0	1	0	0		USA	no	1	1	0	yes	USA	SOUTH CAROLINA	1	0	0	0	0	0	0	0	SOUTH CAROLINA	charleston	3	0	0	1	0	0	no	1		0.8118	3	1	1	0	1	1	0
EN	full	1981	Gustafson, T. L., et al. (1981). "Outbreak of acute pulmonary histoplasmosis in members of a wagon train."Am J Med71(5): 759-765.		0	<21	USA	smoker	TOURISM	0	1	0	0		USA	no	1	1	0	yes	USA	SOUTH CAROLINA	1	0	0	0	0	0	0	0	SOUTH CAROLINA	charleston	3	0	0	1	0	0	no	1		0.8118	3	1	1	0	1	1	0
EN	full	1981	Gustafson, T. L., et al. (1981). "Outbreak of acute pulmonary histoplasmosis in members of a wagon train."Am J Med71(5): 759-765.		0	<21	USA	smoker	TOURISM	0	1	0	0		USA	no	1	1	0	yes	USA	SOUTH CAROLINA	1	0	0	0	0	0	0	0	SOUTH CAROLINA	charleston	3	0	0	1	0	0	no	1		0.8118	3	1	1	0	1	1	0
EN	full	1981	Gustafson, T. L., et al. (1981). "Outbreak of acute pulmonary histoplasmosis in members of a wagon train."Am J Med71(5): 759-765.		0	<21	USA	smoker	TOURISM	0	1	0	0		USA	no	1	1	0	yes	USA	SOUTH CAROLINA	1	0	0	0	0	0	0	0	SOUTH CAROLINA	charleston	3	0	0	1	0	0	no	1		0.8118	3	1	1	0	1	1	0
EN	full	1981	Gustafson, T. L., et al. (1981). "Outbreak of acute pulmonary histoplasmosis in members of a wagon train."Am J Med71(5): 759-765.		1	<21	USA	smoker	TOURISM	0	1	0	0		USA	no	1	1	0	yes	USA	SOUTH CAROLINA	1	0	0	0	0	0	0	0	SOUTH CAROLINA	charleston	3	0	0	1	0	0	no	1		0.8118	3	1	1	0	1	1	0
EN	full	1981	Gustafson, T. L., et al. (1981). "Outbreak of acute pulmonary histoplasmosis in members of a wagon train."Am J Med71(5): 759-765.		1	<21	USA	smoker	TOURISM	0	1	0	0		USA	no	1	1	0	yes	USA	SOUTH CAROLINA	1	0	0	0	0	0	0	0	SOUTH CAROLINA	charleston	3	0	0	1	0	0	no	1		0.8118	3	1	1	0	1	1	0
EN	full	1981	Gustafson, T. L., et al. (1981). "Outbreak of acute pulmonary histoplasmosis in members of a wagon train."Am J Med71(5): 759-765.		1	>21	USA	smoker	TOURISM	0	1	0	0		USA	no	1	1	0	yes	USA	SOUTH CAROLINA	1	0	0	0	0	0	0	0	SOUTH CAROLINA	charleston	3	0	0	1	0	0	no	1		0.8118	3	1	1	0	1	1	0
EN	full	1981	Gustafson, T. L., et al. (1981). "Outbreak of acute pulmonary histoplasmosis in members of a wagon train."Am J Med71(5): 759-765.		0	>21	USA	smoker	TOURISM	0	1	0	0		USA	no	1	1	0	yes	USA	SOUTH CAROLINA	1	0	0	0	0	0	0	0	SOUTH CAROLINA	charleston	3	0	0	1	0	0	no	1		0.8118	3	1	1	0	1	1	0
EN	full	1981	Gustafson, T. L., et al. (1981). "Outbreak of acute pulmonary histoplasmosis in members of a wagon train."Am J Med71(5): 759-765.		1	>21	USA	smoker	TOURISM	0	1	0	0		USA	no	1	1	0	yes	USA	SOUTH CAROLINA	1	0	0	0	0	0	0	0	SOUTH CAROLINA	charleston	3	0	0	1	0	0	no	1		0.8118	3	1	1	0	1	1	0
EN	full	1981	Gustafson, T. L., et al. (1981). "Outbreak of acute pulmonary histoplasmosis in members of a wagon train."Am J Med71(5): 759-765.		1	>21	USA	smoker	TOURISM	0	1	0	0		USA	no	1	1	0	yes	USA	SOUTH CAROLINA	1	0	0	0	0	0	0	0	SOUTH CAROLINA	charleston	3	0	0	1	0	0	no	1		0.8118	3	1	1	0	1	1	0
EN	full	2005	Margery, J., et al. (2005). "[Pseudotumoral presentation of American pulmonary histioplasmosis]."Rev Pneumol Clin61(6): 365-368.		1	32	FRANCE	no	PROFESSIONAL	0	0	1	0	professional travel	SOUTH AMERICA	yes	0	1	0	no	FRANCE	VENEZUELA	0	0	0	1	0	0	0	0	VENEZUELA	sito petrolifero	4	1	0	0	1	1	no	0	caso sporadico		4	1	1	0	0	0	0
EN	full	2005	Margery, J., et al. (2005). "[Pseudotumoral presentation of American pulmonary histioplasmosis]."Rev Pneumol Clin61(6): 365-368.	2	1	49	FRANCE	smoker	PROFESSIONAL	0	0	1	0	professional travel	SOUTH AMERICA	yes	0	1	0	no	FRANCE	VENEZUELA	0	0	0	1	0	0	0	0	VENEZUELA	sito petrolifero	4	1	0	0	1	1	no	0	caso sporadico		4	1	1	0	0	0	0
biblio	full	1991	Mongeal E, et al. Pulmonary histoplasmosis due to Histoplasma capsulatum. A case. !991. Rev Malad Respir; 8(5):495-7	1	0	65	FRANCE	no	TOURISM	0	1	0	0	tourism	CENTRAL AMERICA	yes	0	1	0	no	FRANCE	GUATEMALA	0	0	1	0	0	0	0	0	GUATEMALA	NR	4	1	0	0	1	0	dust	0	caso sporadico		4	1	1	1	1	1	0
EN	full	1997	Nasta, P., et al. (1997). "Acute Histoplasmosis in Spelunkers Returning from Mato Grosso, Peru."J Travel Med4(4): 176-178.		1	25	ITALY	no	SPELEOLOGIST	1	0	0	0	speleologist	SOUTH AMERICA	yes	0	1	0	no	ITALY	PERU	0	0	0	1	0	0	0	0	PERU	mato grosso	1	1	1	1	0	0	no	1		1	3	1	1	0	1	0	1
EN	full	1997	Nasta, P., et al. (1997). "Acute Histoplasmosis in Spelunkers Returning from Mato Grosso, Peru."J Travel Med4(4): 176-178.		1	25	ITALY	no	SPELEOLOGIST	1	0	0	0	speleologist	SOUTH AMERICA	yes	0	1	0	no	ITALY	PERU	0	0	0	1	0	0	0	0	PERU	mato grosso	1	1	1	1	0	0	no	1		1	3	1	1	0	1	1	1
EN	full	1997	Nasta, P., et al. (1997). "Acute Histoplasmosis in Spelunkers Returning from Mato Grosso, Peru."J Travel Med4(4): 176-178.		1	25	ITALY	no	SPELEOLOGIST	1	0	0	0	speleologist	SOUTH AMERICA	yes	0	1	0	no	ITALY	PERU	0	0	0	1	0	0	0	0	PERU	mato grosso	1	1	1	1	0	0	no	1		1	3	1	1	0	1	1	1
EN	full	2014	Rocha-Silva, F., et al. (2014). "Histoplasmosis outbreak in Tamboril cave-Minas Gerais state, Brazil."Med Mycol Case Rep4: 1-4.		0	29	BRASIL		PROFESSIONAL	0	0	1	0	biologist	SOUTH AMERICA	yes	0	1	0	no	BRASIL	BRASIL	0	0	0	1	0	0	0	0	BRASIL	tamboril cave	1	0	1	0	0	1	no	1		1	3	1	1	0	0	0	0
biblio	full	1986	sacks et al. 1986 An outbreak and review of cave associated histoplasmosis capsulati. J med vet mycol 24: 313-319		1	23	USA	smoker, asthma, bronchitis	TOURISM	0	1	0	0	student	USA	no	1	1	0	yes	USA	FLORIDA	1	0	0	0	0	0	0	0	FLORIDA	NR	1		1	0	0	0	no	1		1	3	1	1	1	1	0	1
biblio	full	1986	sacks et al. 1986 An outbreak and review of cave associated histoplasmosis capsulati. J med vet mycol 24: 313-323		1	36	USA	no	PROFESSIONAL	0	0	1	0	professional travel	USA	no	1	1	0	yes	USA	FLORIDA	1	0	0	0	0	0	0	0	FLORIDA	NR	1		1	0	0	1	no	1		1	3	1	1	1	1	1	0
EN	full	2006	Salhab, K. F., et al. (2006). "Growing PET positive nodule in a patient with histoplasmosis: case report."J Cardiothorac Surg1: 23.	1	1	64	USA	smoker, previous prostate cancer, dislipidemia	TOURISM	0	1	0	0	tourism	CENTRAL AMERICA	yes	0	1	0	no	USA	GUATEMALA	0	0	1	0	0	0	0	0	GUATEMALA	NR	4		0	0	1	0	NR	0	caso sporadico		4	1	1	0	0	0	0
EN	full	1999	Valdez, H. and R. A. Salata (1999). "Bat-associated histoplasmosis in returning travelers: case presentation and description of a cluster."J Travel Med6(4): 258-260.	11	0	21	USA		TOURISM	0	1	0	0	student	SOUTH AMERICA	yes	0	1	0	no	USA	ECUADOR	0	0	0	1	0	0	0	0	ECUADOR	cave near atacame, 25 km south of the city of esmeraldas	1	1	1	0	0	0	no	1	11/17 (4 confermati)	0.6471	2	1	1	1	0	0	0
EN	full	1999	Valdez, H. and R. A. Salata (1999). "Bat-associated histoplasmosis in returning travelers: case presentation and description of a cluster."J Travel Med6(4): 258-260.				USA		TOURISM	0	1	0	0	student	SOUTH AMERICA	yes	0	1	0	no	USA	ECUADOR	0	0	0	1	0	0	0	0	ECUADOR	cave near atacame, 25 km south of the city of esmeraldas	1	1	1	0	0	0	no	1		0.6471	2	1	1	1	1	1	0
EN	full	1999	Valdez, H. and R. A. Salata (1999). "Bat-associated histoplasmosis in returning travelers: case presentation and description of a cluster."J Travel Med6(4): 258-260.				USA		TOURISM	0	1	0	0	student	SOUTH AMERICA	yes	0	1	0	no	USA	ECUADOR	0	0	0	1	0	0	0	0	ECUADOR	cave near atacame, 25 km south of the city of esmeraldas	1	1	1	0	0	0	no	1		0.6471	2	1	1	1	1	1	1
EN	full	1999	Valdez, H. and R. A. Salata (1999). "Bat-associated histoplasmosis in returning travelers: case presentation and description of a cluster."J Travel Med6(4): 258-260.				USA		TOURISM	0	1	0	0	student	SOUTH AMERICA	yes	0	1	0	no	USA	ECUADOR	0	0	0	1	0	0	0	0	ECUADOR	cave near atacame, 25 km south of the city of esmeraldas	1	1	1	0	0	0	no	1		0.6471	2	1	1	1	1	0	1
EN	full	1999	Valdez, H. and R. A. Salata (1999). "Bat-associated histoplasmosis in returning travelers: case presentation and description of a cluster."J Travel Med6(4): 258-260.				USA		TOURISM	0	1	0	0	student	SOUTH AMERICA	yes	0	1	0	no	USA	ECUADOR	0	0	0	1	0	0	0	0	ECUADOR	cave near atacame, 25 km south of the city of esmeraldas	1	1	1	0	0	0	no	1		0.6471	2	1	1	1	1	0	1
EN	full	1999	Valdez, H. and R. A. Salata (1999). "Bat-associated histoplasmosis in returning travelers: case presentation and description of a cluster."J Travel Med6(4): 258-260.				USA		TOURISM	0	1	0	0	student	SOUTH AMERICA	yes	0	1	0	no	USA	ECUADOR	0	0	0	1	0	0	0	0	ECUADOR	cave near atacame, 25 km south of the city of esmeraldas	1	1	1	0	0	0	no	1		0.6471	2	1	1	1	1	0	1
EN	full	1999	Valdez, H. and R. A. Salata (1999). "Bat-associated histoplasmosis in returning travelers: case presentation and description of a cluster."J Travel Med6(4): 258-260.				USA		TOURISM	0	1	0	0	student	SOUTH AMERICA	yes	0	1	0	no	USA	ECUADOR	0	0	0	1	0	0	0	0	ECUADOR	cave near atacame, 25 km south of the city of esmeraldas	1	1	1	0	0	0	no	1		0.6471	2	1	1	1	1	0	1
EN	full	1999	Valdez, H. and R. A. Salata (1999). "Bat-associated histoplasmosis in returning travelers: case presentation and description of a cluster."J Travel Med6(4): 258-260.				USA		TOURISM	0	1	0	0	student	SOUTH AMERICA	yes	0	1	0	no	USA	ECUADOR	0	0	0	1	0	0	0	0	ECUADOR	cave near atacame, 25 km south of the city of esmeraldas	1	1	1	0	0	0	no	1		0.6471	2	1	0	0	1		1
EN	full	2003	Weinberg, M., et al. (2003). "Severe histoplasmosis in travelers to Nicaragua."Emerg Infect Dis9(10): 1322-1325.		0	38	USA	no	TOURISM	0	1	0	0	student	CENTRAL AMERICA	yes	0	1	0	no	USA	NICARAGUA	0	0	1	0	0	0	0	0	NICARAGUA	NR	1	1	1	0	0	0	no	1		1	3	1	1	1	1	1	0
EN	full	2003	Weinberg, M., et al. (2003). "Severe histoplasmosis in travelers to Nicaragua."Emerg Infect Dis9(10): 1322-1325.		0	38	USA	no	TOURISM	0	1	0	0	student	CENTRAL AMERICA	yes	0	1	0	no	USA	NICARAGUA	0	0	1	0	0	0	0	0	NICARAGUA	NR	1	1	1	0	0	0	no	1		1	3	1	1	1	1	1	0
EN	full	2003	Weinberg, M., et al. (2003). "Severe histoplasmosis in travelers to Nicaragua."Emerg Infect Dis9(10): 1322-1325.		0	38	USA	no	TOURISM	0	1	0	0	student	CENTRAL AMERICA	yes	0	1	0	no	USA	NICARAGUA	0	0	1	0	0	0	0	0	NICARAGUA	NR	1	1	1	0	0	0	no	1		1	3	1	1	1	1	1	1
EN	full	2003	Weinberg, M., et al. (2003). "Severe histoplasmosis in travelers to Nicaragua."Emerg Infect Dis9(10): 1322-1325.		0	38	USA	no	TOURISM	0	1	0	0	student	CENTRAL AMERICA	yes	0	1	0	no	USA	NICARAGUA	0	0	1	0	0	0	0	0	NICARAGUA	NR	1	1	1	0	0	0	no	1		1	3	1	1	1	1	1	1
EN	full	2003	Weinberg, M., et al. (2003). "Severe histoplasmosis in travelers to Nicaragua."Emerg Infect Dis9(10): 1322-1325.		1	38	USA	no	TOURISM	0	1	0	0	student	CENTRAL AMERICA	yes	0	1	0	no	USA	NICARAGUA	0	0	1	0	0	0	0	0	NICARAGUA	NR	1	1	1	0	0	0	no	1		1	3	1	1	1	1	1	1
EN	full	2003	Weinberg, M., et al. (2003). "Severe histoplasmosis in travelers to Nicaragua."Emerg Infect Dis9(10): 1322-1325.		1	38	USA	no	TOURISM	0	1	0	0	student	CENTRAL AMERICA	yes	0	1	0	no	USA	NICARAGUA	0	0	1	0	0	0	0	0	NICARAGUA	NR	1	1	1	0	0	0	no	1		1	3	1	1	1	1	1	1
EN	full	2003	Weinberg, M., et al. (2003). "Severe histoplasmosis in travelers to Nicaragua."Emerg Infect Dis9(10): 1322-1325.		1	38	USA	no	TOURISM	0	1	0	0	student	CENTRAL AMERICA	yes	0	1	0	no	USA	NICARAGUA	0	0	1	0	0	0	0	0	NICARAGUA	NR	1	1	1	0	0	0	no	1		1	3	1	1	1	1	1	1
EN	full	2003	Weinberg, M., et al. (2003). "Severe histoplasmosis in travelers to Nicaragua."Emerg Infect Dis9(10): 1322-1325.		1	38	USA	no	TOURISM	0	1	0	0	student	CENTRAL AMERICA	yes	0	1	0	no	USA	NICARAGUA	0	0	1	0	0	0	0	0	NICARAGUA	NR	1	1	1	0	0	0	no	1		1	3	1	1	1	1	1	1
EN	full	1999	Wolff, M. (1999). "[Outbreak of acute histoplasmosis in Chilean travelers to the ecuadorian jungle: an example of geographic medicine]."Rev Med Chil127(11): 1359-1364.	6	1	18	CHILE	no	TOURISM	0	1	0	0	tourism	SOUTH AMERICA	yes	0	1	0	no	CHILE	ECUADOR	0	0	0	1	0	0	0	0	ECUADOR	zone urbane (quito, cuenca, guayaquil) e rurali-selvatiche (tena)	4		0	1	1	0	dust	1	6/6 (100%)	1	3	1	1	0	1	1	0
EN	full	1999	Wolff, M. (1999). "[Outbreak of acute histoplasmosis in Chilean travelers to the ecuadorian jungle: an example of geographic medicine]."Rev Med Chil127(11): 1359-1364.				CHILE	no	TOURISM	0	1	0	0	tourism	SOUTH AMERICA	yes	0	1	0	no	CHILE	ECUADOR	0	0	0	1	0	0	0	0	ECUADOR	zone urbane (quito, cuenca, guayaquil) e rurali-selvatiche (tena)	4		0	1	1	0	dust	1		1	3	1	1	0	1	1	0
EN	full	1999	Wolff, M. (1999). "[Outbreak of acute histoplasmosis in Chilean travelers to the ecuadorian jungle: an example of geographic medicine]."Rev Med Chil127(11): 1359-1364.				CHILE	no	TOURISM	0	1	0	0	tourism	SOUTH AMERICA	yes	0	1	0	no	CHILE	ECUADOR	0	0	0	1	0	0	0	0	ECUADOR	zone urbane (quito, cuenca, guayaquil) e rurali-selvatiche (tena)	4		0	1	1	0	dust	1		1	3	1	1	0	1	1	0
EN	full	1999	Wolff, M. (1999). "[Outbreak of acute histoplasmosis in Chilean travelers to the ecuadorian jungle: an example of geographic medicine]."Rev Med Chil127(11): 1359-1364.				CHILE	no	TOURISM	0	1	0	0	tourism	SOUTH AMERICA	yes	0	1	0	no	CHILE	ECUADOR	0	0	0	1	0	0	0	0	ECUADOR	zone urbane (quito, cuenca, guayaquil) e rurali-selvatiche (tena)	4		0	1	1	0	dust	1		1	3	1	1	0	1	1	0
EN	full	1999	Wolff, M. (1999). "[Outbreak of acute histoplasmosis in Chilean travelers to the ecuadorian jungle: an example of geographic medicine]."Rev Med Chil127(11): 1359-1364.				CHILE	no	TOURISM	0	1	0	0	tourism	SOUTH AMERICA	yes	0	1	0	no	CHILE	ECUADOR	0	0	0	1	0	0	0	0	ECUADOR	zone urbane (quito, cuenca, guayaquil) e rurali-selvatiche (tena)	4		0	1	1	0	dust	1		1	3	1	1	0	1	1	0
NEGRAR	2	2006		FD	1	30	ITALY	no	TOURISM	0	1	0	0	tourism	SOUTH AMERICA	yes	0	1	0	no	ITALY	ECUADOR	0	0	0	1	0	0	0	0	ECUADOR		4	1	0	0	1	1	no	1		0.708	2	1	0		0	0	0
NEGRAR	4	2006		SA	1	47	ITALY	no	TOURISM	0	1	0	0	tourism	SOUTH AMERICA	yes	0	1	0	no	ITALY	ECUADOR	0	0	0	1	0	0	0	0	ECUADOR		4	1	0	0	1	1	no	1		0.708	2	1	1		0	0	0
NEGRAR	12	2006		AN	1	22	ITALY	no	TOURISM	0	1	0	0	tourism	SOUTH AMERICA	yes	0	1	0	no	ITALY	ECUADOR	0	0	0	1	0	0	0	0	ECUADOR		4	1	0	0	1	1	no	1		0.708	2	1	1		0	0	0
NEGRAR	14	2006		PL	1	32	ITALY	pregresso asma allergico	TOURISM	0	1	0	0	tourism	SOUTH AMERICA	yes	0	1	0	no	ITALY	ECUADOR	0	0	0	1	0	0	0	0	ECUADOR		4	1	0	0	1	1	no	1		0.708	2	1	1		0	0	0
EN	full	1981	Gustafson, T. L., et al. (1981). "Outbreak of acute pulmonary histoplasmosis in members of a wagon train."Am J Med71(5): 759-765.		1	<21	USA	no	TOURISM	0	1	0	0		USA	no	1	1	0	yes	USA	SOUTH CAROLINA	1	0	0	0	0	0	0	0	SOUTH CAROLINA	charleston	3	0	0	1	0	0	no	1		0.8118	3	0	0	0	0	0	0
EN	full	1981	Gustafson, T. L., et al. (1981). "Outbreak of acute pulmonary histoplasmosis in members of a wagon train."Am J Med71(5): 759-765.		1	<21	USA	smoker	TOURISM	0	1	0	0		USA	no	1	1	0	yes	USA	SOUTH CAROLINA	1	0	0	0	0	0	0	0	SOUTH CAROLINA	charleston	3	0	0	1	0	0	no	1		0.8118	3	0	0	0	0	0	0
EN	full	1981	Gustafson, T. L., et al. (1981). "Outbreak of acute pulmonary histoplasmosis in members of a wagon train."Am J Med71(5): 759-765.		1	<21	USA	smoker	TOURISM	0	1	0	0		USA	no	1	1	0	yes	USA	SOUTH CAROLINA	1	0	0	0	0	0	0	0	SOUTH CAROLINA	charleston	3	0	0	1	0	0	no	1		0.8118	3	0	0	0	0	0	0
EN	full	1981	Gustafson, T. L., et al. (1981). "Outbreak of acute pulmonary histoplasmosis in members of a wagon train."Am J Med71(5): 759-765.		1	<21	USA	smoker	TOURISM	0	1	0	0		USA	no	1	1	0	yes	USA	SOUTH CAROLINA	1	0	0	0	0	0	0	0	SOUTH CAROLINA	charleston	3	0	0	1	0	0	no	1		0.8118	3	0	0	0	0	0	0
EN	full	1981	Gustafson, T. L., et al. (1981). "Outbreak of acute pulmonary histoplasmosis in members of a wagon train."Am J Med71(5): 759-765.		1	<21	USA	smoker	TOURISM	0	1	0	0		USA	no	1	1	0	yes	USA	SOUTH CAROLINA	1	0	0	0	0	0	0	0	SOUTH CAROLINA	charleston	3	0	0	1	0	0	no	1		0.8118	3	0	0	0	0	0	0
EN	full	1981	Gustafson, T. L., et al. (1981). "Outbreak of acute pulmonary histoplasmosis in members of a wagon train."Am J Med71(5): 759-765.		1	<21	USA	smoker	TOURISM	0	1	0	0		USA	no	1	1	0	yes	USA	SOUTH CAROLINA	1	0	0	0	0	0	0	0	SOUTH CAROLINA	charleston	3	0	0	1	0	0	no	1		0.8118	3	0	0	0	0	0	0
EN	full	1981	Gustafson, T. L., et al. (1981). "Outbreak of acute pulmonary histoplasmosis in members of a wagon train."Am J Med71(5): 759-765.		1	<21	USA	smoker	TOURISM	0	1	0	0		USA	no	1	1	0	yes	USA	SOUTH CAROLINA	1	0	0	0	0	0	0	0	SOUTH CAROLINA	charleston	3	0	0	1	0	0	no	1		0.8118	3	0	0	0	0	0	0
EN	full	1981	Gustafson, T. L., et al. (1981). "Outbreak of acute pulmonary histoplasmosis in members of a wagon train."Am J Med71(5): 759-765.		1	<21	USA	smoker	TOURISM	0	1	0	0		USA	no	1	1	0	yes	USA	SOUTH CAROLINA	1	0	0	0	0	0	0	0	SOUTH CAROLINA	charleston	3	0	0	1	0	0	no	1		0.8118	3	0	0	0	0	0	0
EN	full	1981	Gustafson, T. L., et al. (1981). "Outbreak of acute pulmonary histoplasmosis in members of a wagon train."Am J Med71(5): 759-765.		1	<21	USA	smoker	TOURISM	0	1	0	0		USA	no	1	1	0	yes	USA	SOUTH CAROLINA	1	0	0	0	0	0	0	0	SOUTH CAROLINA	charleston	3	0	0	1	0	0	no	1		0.8118	3	0	0	0	0	0	0
EN	full	1981	Gustafson, T. L., et al. (1981). "Outbreak of acute pulmonary histoplasmosis in members of a wagon train."Am J Med71(5): 759-765.		1	>21	USA	smoker	TOURISM	0	1	0	0		USA	no	1	1	0	yes	USA	SOUTH CAROLINA	1	0	0	0	0	0	0	0	SOUTH CAROLINA	charleston	3	0	0	1	0	0	no	1		0.8118	3	0	0	0	0	0	0
EN	full	1981	Gustafson, T. L., et al. (1981). "Outbreak of acute pulmonary histoplasmosis in members of a wagon train."Am J Med71(5): 759-765.		1	>21	USA	smoker	TOURISM	0	1	0	0		USA	no	1	1	0	yes	USA	SOUTH CAROLINA	1	0	0	0	0	0	0	0	SOUTH CAROLINA	charleston	3	0	0	1	0	0	no	1		0.8118	3	0	0	0	0	0	0
EN	full	1981	Gustafson, T. L., et al. (1981). "Outbreak of acute pulmonary histoplasmosis in members of a wagon train."Am J Med71(5): 759-765.		1	>21	USA	smoker	TOURISM	0	1	0	0		USA	no	1	1	0	yes	USA	SOUTH CAROLINA	1	0	0	0	0	0	0	0	SOUTH CAROLINA	charleston	3	0	0	1	0	0	no	1		0.8118	3	0	0	0	0	0	0
EN	full	1981	Gustafson, T. L., et al. (1981). "Outbreak of acute pulmonary histoplasmosis in members of a wagon train."Am J Med71(5): 759-765.		1	<21	USA	smoker	TOURISM	0	1	0	0		USA	no	1	1	0	yes	USA	SOUTH CAROLINA	1	0	0	0	0	0	0	0	SOUTH CAROLINA	charleston	3	0	0	1	0	0	no	1		0.8118	3	0	0	0	0	0	0
EN	full	1981	Gustafson, T. L., et al. (1981). "Outbreak of acute pulmonary histoplasmosis in members of a wagon train."Am J Med71(5): 759-765.		1	<21	USA	smoker	TOURISM	0	1	0	0		USA	no	1	1	0	yes	USA	SOUTH CAROLINA	1	0	0	0	0	0	0	0	SOUTH CAROLINA	charleston	3	0	0	1	0	0	no	1		0.8118	3	0	0	0	0	0	0
EN	full	1981	Gustafson, T. L., et al. (1981). "Outbreak of acute pulmonary histoplasmosis in members of a wagon train."Am J Med71(5): 759-765.		1	<21	USA	smoker	TOURISM	0	1	0	0		USA	no	1	1	0	yes	USA	SOUTH CAROLINA	1	0	0	0	0	0	0	0	SOUTH CAROLINA	charleston	3	0	0	1	0	0	no	1		0.8118	3	0	0	0	0	0	0
EN	full	2007	shimamoto et al. Pulmonary histoplasmosis as an example of imported mycoses in Japan. Gen thorac cardiovasc surg. 2007 Aug; 55(8):335-8	1	1	56	JAPAN		PROFESSIONAL	0	0	0	0	PHYTOPATOLOGIST	SOUTH EAST ASIA	no	1	1	0	no	JAPAN	BOLIVIA	0	0	0	1	0	0	0	0	BOLIVIA	NR	4	1	0	0	1	1	NR	0	caso sporadico		4
EN	full	1999	Valdez, H. and R. A. Salata (1999). "Bat-associated histoplasmosis in returning travelers: case presentation and description of a cluster."J Travel Med6(4): 258-260.				USA		TOURISM	0	1	0	0	student	SOUTH AMERICA	yes	0	1	0	no	USA	ECUADOR	0	0	0	1	0	0	0	0	ECUADOR	cave near atacame, 25 km south of the city of esmeraldas	1	1	1	0	0	0	no	1		0.6471	2
EN	full	1999	Valdez, H. and R. A. Salata (1999). "Bat-associated histoplasmosis in returning travelers: case presentation and description of a cluster."J Travel Med6(4): 258-260.				USA		TOURISM	0	1	0	0	student	SOUTH AMERICA	yes	0	1	0	no	USA	ECUADOR	0	0	0	1	0	0	0	0	ECUADOR	cave near atacame, 25 km south of the city of esmeraldas	1	1	1	0	0	0	no	1		0.6471	2
EN	full	1988	(1988). "Cave-associated histoplasmosis--Costa Rica."MMWR Morb Mortal Wkly Rep37(20): 312-313.			24			TOURISM	0	1	0	0	student	CENTRAL AMERICA	yes	0	1	0	no		COSTA RICA	0	0	1	0	0	0	0	0	COSTA RICA	santa rosa national park	1		1	0	0	0	no	1		0.8824	3	1	1	0	1	1	1
EN	full	1988	(1988). "Cave-associated histoplasmosis--Costa Rica."MMWR Morb Mortal Wkly Rep37(20): 312-313.			24			TOURISM	0	1	0	0	student	CENTRAL AMERICA	yes	0	1	0	no		COSTA RICA	0	0	1	0	0	0	0	0	COSTA RICA	santa rosa national park	1		1	0	0	0	no	1		0.8824	3	1	1	0	1	1	1
EN	full	1988	(1988). "Cave-associated histoplasmosis--Costa Rica."MMWR Morb Mortal Wkly Rep37(20): 312-313.			24			TOURISM	0	1	0	0	student	CENTRAL AMERICA	yes	0	1	0	no		COSTA RICA	0	0	1	0	0	0	0	0	COSTA RICA	santa rosa national park	1		1	0	0	0	no	1		0.8824	3	1	1	0	1	1	1
EN	full	1988	(1988). "Cave-associated histoplasmosis--Costa Rica."MMWR Morb Mortal Wkly Rep37(20): 312-313.			24			TOURISM	0	1	0	0	student	CENTRAL AMERICA	yes	0	1	0	no		COSTA RICA	0	0	1	0	0	0	0	0	COSTA RICA	santa rosa national park	1		1	0	0	0	no	1		0.8824	3	1	1	0	1	1	1
EN	full	1988	(1988). "Cave-associated histoplasmosis--Costa Rica."MMWR Morb Mortal Wkly Rep37(20): 312-313.			24			TOURISM	0	1	0	0	student	CENTRAL AMERICA	yes	0	1	0	no		COSTA RICA	0	0	1	0	0	0	0	0	COSTA RICA	santa rosa national park	1		1	0	0	0	no	1		0.8824	3	1	1	0	1	1	1
EN	full	1988	(1988). "Cave-associated histoplasmosis--Costa Rica."MMWR Morb Mortal Wkly Rep37(20): 312-313.			24			TOURISM	0	1	0	0	student	CENTRAL AMERICA	yes	0	1	0	no		COSTA RICA	0	0	1	0	0	0	0	0	COSTA RICA	santa rosa national park	1		1	0	0	0	no	1		0.8824	3	1	1	0	1	1	1
EN	full	1988	(1988). "Cave-associated histoplasmosis--Costa Rica."MMWR Morb Mortal Wkly Rep37(20): 312-313.			24			TOURISM	0	1	0	0	student	CENTRAL AMERICA	yes	0	1	0	no		COSTA RICA	0	0	1	0	0	0	0	0	COSTA RICA	santa rosa national park	1		1	0	0	0	no	1		0.8824	3	1	1	0	1	1	1
EN	full	1988	(1988). "Cave-associated histoplasmosis--Costa Rica."MMWR Morb Mortal Wkly Rep37(20): 312-313.			24			TOURISM	0	1	0	0	student	CENTRAL AMERICA	yes	0	1	0	no		COSTA RICA	0	0	1	0	0	0	0	0	COSTA RICA	santa rosa national park	1		1	0	0	0	no	1		0.8824	3	1	1	0	1	1	1
EN	full	1988	(1988). "Cave-associated histoplasmosis--Costa Rica."MMWR Morb Mortal Wkly Rep37(20): 312-313.			24			TOURISM	0	1	0	0	student	CENTRAL AMERICA	yes	0	1	0	no		COSTA RICA	0	0	1	0	0	0	0	0	COSTA RICA	santa rosa national park	1		1	0	0	0	no	1		0.8824	3	1	1	0	1	1	1
EN	full	1988	(1988). "Cave-associated histoplasmosis--Costa Rica."MMWR Morb Mortal Wkly Rep37(20): 312-313.			24			TOURISM	0	1	0	0	student	CENTRAL AMERICA	yes	0	1	0	no		COSTA RICA	0	0	1	0	0	0	0	0	COSTA RICA	santa rosa national park	1		1	0	0	0	no	1		0.8824	3	1	1	0	1	1	1
EN	full	1988	(1988). "Cave-associated histoplasmosis--Costa Rica."MMWR Morb Mortal Wkly Rep37(20): 312-313.			24			TOURISM	0	1	0	0	student	CENTRAL AMERICA	yes	0	1	0	no		COSTA RICA	0	0	1	0	0	0	0	0	COSTA RICA	santa rosa national park	1		1	0	0	0	no	1		0.8824	3	1	1	0	1	0	1
EN	full	1988	(1988). "Cave-associated histoplasmosis--Costa Rica."MMWR Morb Mortal Wkly Rep37(20): 312-313.			24			TOURISM	0	1	0	0	student	CENTRAL AMERICA	yes	0	1	0	no		COSTA RICA	0	0	1	0	0	0	0	0	COSTA RICA	santa rosa national park	1		1	0	0	0	no	1		0.8824	3	1	1	0	1	0	1
EN	full	1988	(1988). "Cave-associated histoplasmosis--Costa Rica."MMWR Morb Mortal Wkly Rep37(20): 312-313.			24			TOURISM	0	1	0	0	student	CENTRAL AMERICA	yes	0	1	0	no		COSTA RICA	0	0	1	0	0	0	0	0	COSTA RICA	santa rosa national park	1		1	0	0	0	no	1		0.8824	3	1	1	0	0	0	0
EN	full	1988	(1988). "Cave-associated histoplasmosis--Costa Rica."MMWR Morb Mortal Wkly Rep37(20): 312-313.	15		24			TOURISM	0	1	0	0	student	CENTRAL AMERICA	yes	0	1	0	no		COSTA RICA	0	0	1	0	0	0	0	0	COSTA RICA	santa rosa national park	1		1	0	0	0	no	1	15/17	0.8824	3	1	1	0	1	1	1
EN	full	1988	(1988). "Cave-associated histoplasmosis--Costa Rica."MMWR Morb Mortal Wkly Rep37(20): 312-313.			24			TOURISM	0	1	0	0	student	CENTRAL AMERICA	yes	0	1	0	no		COSTA RICA	0	0	1	0	0	0	0	0	COSTA RICA	santa rosa national park	1		1	0	0	0	no	1		0.8824	3	1	1	0	1	1	1
EN	full	2004	Ansart, S., et al. (2004). "Pneumonia among travelers returning from abroad."J Travel Med11(2): 87-91.	1			FRANCE	no	TOURISM	0	1	0	0	tourism	SOUTH AMERICA	yes	0	1	0	no	FRANCE	COLOMBIA	0	0	0	1	0	0	0	0	COLOMBIA	NR	1	1	1	0	0	0	no	0	caso sporadico		4	1
EN	full	1995	Bonnet, D., et al. (1995). "[Round pulmonary lesions after returning from French Guyana. Six cases of american pulmonary histoplasmosis]."Med Trop (Mars)55(1): 55-60.		1	20	FRANCE	no	PROFESSIONAL	0	0	1	0	soldier	SOUTH AMERICA	yes	0	1	0	no	FRANCE	GUYANA	0	0	0	1	0	0	0	0	GUYANA	NR	4	1	0	0	1	1	no				4	1	0	0	1	1	0
EN	full	1995	Bonnet, D., et al. (1995). "[Round pulmonary lesions after returning from French Guyana. Six cases of american pulmonary histoplasmosis]."Med Trop (Mars)55(1): 55-60.		1	26	FRANCE	smoker	PROFESSIONAL	0	0	1	0	soldier	SOUTH AMERICA	yes	0	1	0	no	FRANCE	GUYANA	0	0	0	1	0	0	0	0	GUYANA	NR	4	1	0	0	1	1	no				4	1	0	0	1	1	1
EN	full	2011	Buitrago, M. J., et al. (2011). "Histoplasmosis and paracoccidioidomycosis in a non-endemic area: a review of cases and diagnosis."J Travel Med18(1): 26-33.		1	46	SPAIN	no	TOURISM	0	1	0	0	tourism	SOUTH AMERICA	yes	0	1	0	no	SPAIN	ANGOLA, BRASIL, PERU	0	0	0	1	0	0	0	0	ECUADOR	NR	4	1	0	0	1	0	NR	0	caso sporadico		4	1
EN	full	2011	Buitrago, M. J., et al. (2011). "Histoplasmosis and paracoccidioidomycosis in a non-endemic area: a review of cases and diagnosis."J Travel Med18(1): 26-33.		1	54	SPAIN	no	VOLUNTEER	0	0	0	0	volunteer	AFRICA	no	1	1	0	no	SPAIN	VENEZUELA	0	0	0	1	0	0	0	0	AFRICA	NR	4	1	0	0	1	1	NR	0	caso sporadico		4	1
EN	full	2011	Buitrago, M. J., et al. (2011). "Histoplasmosis and paracoccidioidomycosis in a non-endemic area: a review of cases and diagnosis."J Travel Med18(1): 26-33.		0		SPAIN	no	SPELEOLOGIST	1	0	0	0	speleologist	SOUTH AMERICA	yes	0	1	0	no	SPAIN	AFRICA	0	0	0	1	0	0	0	0	VENEZUELA	NR	1	1	1	0	0	0	no	0	caso sporadico		4	1
EN	full	2011	Buitrago, M. J., et al. (2011). "Histoplasmosis and paracoccidioidomycosis in a non-endemic area: a review of cases and diagnosis."J Travel Med18(1): 26-33.		1	54	SPAIN	no	TOURISM	0	1	0	0	tourism	CENTRAL AMERICA	yes	0	1	0	no	SPAIN	NICARAGUA	0	0	1	0	0	0	0	0	NICARAGUA	NR	4	1	0	0	1	0	NR	0	caso sporadico		4	1
EN	full	2011	Buitrago, M. J., et al. (2011). "Histoplasmosis and paracoccidioidomycosis in a non-endemic area: a review of cases and diagnosis."J Travel Med18(1): 26-33.	5	1	53	SPAIN	no	PROFESSIONAL	0	0	1	0	biologist	SOUTH AMERICA	yes	0	0	1	no	SPAIN	ECUADOR	0	0	0	0	1	0	0	0	ANGOLA, BRASIL, PERU	NR	4	1	0	0	1	1	NR	0	caso sporadico		4	1
EN	full	2002	Buxton, J. A., et al. (2002). "Outbreak of histoplasmosis in a school party that visited a cave in Belize: role of antigen testing in diagnosis."J Travel Med9(1): 48-50.	14		17	CANADA		TOURISM	0	1	0	0	student	CENTRAL AMERICA	yes	0	1	0	no	CANADA	BELIZE	0	0	1	0	0	0	0	0	BELIZE	NR	1	1	1	0	1	0	camping	1	14/16	0.875	3	1	1	1	1	1	1
EN	full	2002	Buxton, J. A., et al. (2002). "Outbreak of histoplasmosis in a school party that visited a cave in Belize: role of antigen testing in diagnosis."J Travel Med9(1): 48-50.			17	CANADA		TOURISM	0	1	0	0	student	CENTRAL AMERICA	yes	0	1	0	no	CANADA	BELIZE	0	0	1	0	0	0	0	0	BELIZE	NR	1	1	1	0	1	0	camping	1		0.875	3	1	1	1	1	1	1
EN	full	2002	Buxton, J. A., et al. (2002). "Outbreak of histoplasmosis in a school party that visited a cave in Belize: role of antigen testing in diagnosis."J Travel Med9(1): 48-50.			17	CANADA		TOURISM	0	1	0	0	student	CENTRAL AMERICA	yes	0	1	0	no	CANADA	BELIZE	0	0	1	0	0	0	0	0	BELIZE	NR	1	1	1	0	1	0	camping	1		0.875	3	1	1	1	1	1	1
EN	full	2002	Buxton, J. A., et al. (2002). "Outbreak of histoplasmosis in a school party that visited a cave in Belize: role of antigen testing in diagnosis."J Travel Med9(1): 48-50.			17	CANADA		TOURISM	0	1	0	0	student	CENTRAL AMERICA	yes	0	1	0	no	CANADA	BELIZE	0	0	1	0	0	0	0	0	BELIZE	NR	1	1	1	0	1	0	camping	1		0.875	3	1	1	1	1	1	1
EN	full	2002	Buxton, J. A., et al. (2002). "Outbreak of histoplasmosis in a school party that visited a cave in Belize: role of antigen testing in diagnosis."J Travel Med9(1): 48-50.			17	CANADA		TOURISM	0	1	0	0	student	CENTRAL AMERICA	yes	0	1	0	no	CANADA	BELIZE	0	0	1	0	0	0	0	0	BELIZE	NR	1	1	1	0	1	0	camping	1		0.875	3	1	1	1	1	1	1
EN	full	2002	Buxton, J. A., et al. (2002). "Outbreak of histoplasmosis in a school party that visited a cave in Belize: role of antigen testing in diagnosis."J Travel Med9(1): 48-50.			17	CANADA		TOURISM	0	1	0	0	student	CENTRAL AMERICA	yes	0	1	0	no	CANADA	BELIZE	0	0	1	0	0	0	0	0	BELIZE	NR	1	1	1	0	1	0	camping	1		0.875	3	1	1	1	1	1	1
EN	full	2002	Buxton, J. A., et al. (2002). "Outbreak of histoplasmosis in a school party that visited a cave in Belize: role of antigen testing in diagnosis."J Travel Med9(1): 48-50.			17	CANADA		TOURISM	0	1	0	0	student	CENTRAL AMERICA	yes	0	1	0	no	CANADA	BELIZE	0	0	1	0	0	0	0	0	BELIZE	NR	1	1	1	0	1	0	camping	1		0.875	3	1	1	1	1	1	1
EN	full	2002	Buxton, J. A., et al. (2002). "Outbreak of histoplasmosis in a school party that visited a cave in Belize: role of antigen testing in diagnosis."J Travel Med9(1): 48-50.			17	CANADA		TOURISM	0	1	0	0	student	CENTRAL AMERICA	yes	0	1	0	no	CANADA	BELIZE	0	0	1	0	0	0	0	0	BELIZE	NR	1	1	1	0	1	0	camping	1		0.875	3	1	1	1	1	1	1
EN	full	2002	Buxton, J. A., et al. (2002). "Outbreak of histoplasmosis in a school party that visited a cave in Belize: role of antigen testing in diagnosis."J Travel Med9(1): 48-50.			17	CANADA		TOURISM	0	1	0	0	student	CENTRAL AMERICA	yes	0	1	0	no	CANADA	BELIZE	0	0	1	0	0	0	0	0	BELIZE	NR	1	1	1	0	1	0	camping	1		0.875	3	1	1	1	1	0	1
EN	full	2002	Buxton, J. A., et al. (2002). "Outbreak of histoplasmosis in a school party that visited a cave in Belize: role of antigen testing in diagnosis."J Travel Med9(1): 48-50.			17	CANADA		TOURISM	0	1	0	0	student	CENTRAL AMERICA	yes	0	1	0	no	CANADA	BELIZE	0	0	1	0	0	0	0	0	BELIZE	NR	1	1	1	0	1	0	camping	1		0.875	3	1	1	1	1	0	1
EN	full	2002	Buxton, J. A., et al. (2002). "Outbreak of histoplasmosis in a school party that visited a cave in Belize: role of antigen testing in diagnosis."J Travel Med9(1): 48-50.			17	CANADA		TOURISM	0	1	0	0	student	CENTRAL AMERICA	yes	0	1	0	no	CANADA	BELIZE	0	0	1	0	0	0	0	0	BELIZE	NR	1	1	1	0	1	0	camping	1		0.875	3	1	1	1	1	0	1
EN	full	2002	Buxton, J. A., et al. (2002). "Outbreak of histoplasmosis in a school party that visited a cave in Belize: role of antigen testing in diagnosis."J Travel Med9(1): 48-50.			17	CANADA		TOURISM	0	1	0	0	student	CENTRAL AMERICA	yes	0	1	0	no	CANADA	BELIZE	0	0	1	0	0	0	0	0	BELIZE	NR	1	1	1	0	1	0	camping	1		0.875	3	1	1	1	0	0	0
EN	full	2002	Buxton, J. A., et al. (2002). "Outbreak of histoplasmosis in a school party that visited a cave in Belize: role of antigen testing in diagnosis."J Travel Med9(1): 48-50.				CANADA		TOURISM	0	1	0	0	teacher	CENTRAL AMERICA	yes	0	1	0	no	CANADA	BELIZE	0	0	1	0	0	0	0	0	BELIZE	NR	1	1	1	0	1	0	camping	1		0.875	3	1	0	1	0	0	0
EN	full	2002	Buxton, J. A., et al. (2002). "Outbreak of histoplasmosis in a school party that visited a cave in Belize: role of antigen testing in diagnosis."J Travel Med9(1): 48-50.				CANADA		TOURISM	0	1	0	0	teacher	CENTRAL AMERICA	yes	0	1	0	no	CANADA	BELIZE	0	0	1	0	0	0	0	0	BELIZE	NR	1	1	1	0	1	0	camping	1		0.875	3	1	0	1	0	0	0
EN	full	1981	Castaneda et al. Histoplasmosis epidemica. Aspectos clinicos y serologicos. Biomedica 1981; 1(1): 16-22.	33	1	29															COLOMBIA	COLOMBIA	0	0	0	1	0	0	0	0				0	1	0	0	0		1	33\42	0.7857	3	1	1	0	0	0	0
EN	full	1981	Castaneda et al. Histoplasmosis epidemica. Aspectos clinicos y serologicos. Biomedica 1981; 1(1): 16-22.		1	29															COLOMBIA	COLOMBIA	0	0	0	1	0	0	0	0	0	0	0	0	1	0	0	0		1		0.7857	3	1	1	0	0	0	0
EN	full	1981	Castaneda et al. Histoplasmosis epidemica. Aspectos clinicos y serologicos. Biomedica 1981; 1(1): 16-22.		1	29															COLOMBIA	COLOMBIA	0	0	0	1	0	0	0	0	0	0	0	0	1	0	0	0		1		0.7857	3	1	1	0	0	0	0
EN	full	1981	Castaneda et al. Histoplasmosis epidemica. Aspectos clinicos y serologicos. Biomedica 1981; 1(1): 16-22.		1	29															COLOMBIA	COLOMBIA	0	0	0	1	0	0	0	0	0	0	0	0	1	0	0	0		1		0.7857	3	1	1	0	0	0	0
EN	full	1981	Castaneda et al. Histoplasmosis epidemica. Aspectos clinicos y serologicos. Biomedica 1981; 1(1): 16-22.		0	29															COLOMBIA	COLOMBIA	0	0	0	1	0	0	0	0	0	0	0	0	1	0	0	0		1		0.7857	3	1	1	0	0	0	0
EN	full	1981	Castaneda et al. Histoplasmosis epidemica. Aspectos clinicos y serologicos. Biomedica 1981; 1(1): 16-22.		0	29															COLOMBIA	COLOMBIA	0	0	0	1	0	0	0	0	0	0	0	0	1	0	0	0		1		0.7857	3	1	1	0	0	0	0
EN	full	1981	Castaneda et al. Histoplasmosis epidemica. Aspectos clinicos y serologicos. Biomedica 1981; 1(1): 16-22.		1	16.5															COLOMBIA	COLOMBIA	0	0	0	1	0	0	0	0	0	0	0	0	1	0	0	0		1		0.7857	3	1	1	0	1	1	0
EN	full	1981	Castaneda et al. Histoplasmosis epidemica. Aspectos clinicos y serologicos. Biomedica 1981; 1(1): 16-22.		1	16.5															COLOMBIA	COLOMBIA	0	0	0	1	0	0	0	0	0	0	0	0	1	0	0	0		1		0.7857	3	1	1	0	1	1	0
EN	full	1981	Castaneda et al. Histoplasmosis epidemica. Aspectos clinicos y serologicos. Biomedica 1981; 1(1): 16-22.		1	16.5															COLOMBIA	COLOMBIA	0	0	0	1	0	0	0	0	0	0	0	0	1	0	0	0		1		0.7857	3	1	1	0	1	1	0
EN	full	1981	Castaneda et al. Histoplasmosis epidemica. Aspectos clinicos y serologicos. Biomedica 1981; 1(1): 16-22.		1	16.5															COLOMBIA	COLOMBIA	0	0	0	1	0	0	0	0	0	0	0	0	1	0	0	0		1		0.7857	3	1	1	0	1	1	0
EN	full	1981	Castaneda et al. Histoplasmosis epidemica. Aspectos clinicos y serologicos. Biomedica 1981; 1(1): 16-22.		1	16.5															COLOMBIA	COLOMBIA	0	0	0	1	0	0	0	0	0	0	0	0	1	0	0	0		1		0.7857	3	1	0	0	1	1	0
EN	full	1981	Castaneda et al. Histoplasmosis epidemica. Aspectos clinicos y serologicos. Biomedica 1981; 1(1): 16-22.		1	16.5															COLOMBIA	COLOMBIA	0	0	0	1	0	0	0	0	0	0	0	0	1	0	0	0		1		0.7857	3	1	0	0	1	1	0
EN	full	1981	Castaneda et al. Histoplasmosis epidemica. Aspectos clinicos y serologicos. Biomedica 1981; 1(1): 16-22.		1	16.5															COLOMBIA	COLOMBIA	0	0	0	1	0	0	0	0	0	0	0	0	1	0	0	0		1		0.7857	3	1	0	0	1	1	0
EN	full	1981	Castaneda et al. Histoplasmosis epidemica. Aspectos clinicos y serologicos. Biomedica 1981; 1(1): 16-22.		1	16.5															COLOMBIA	COLOMBIA	0	0	0	1	0	0	0	0	0	0	0	0	1	0	0	0		1		0.7857	3	1	0	0	1	1	0
EN	full	1981	Castaneda et al. Histoplasmosis epidemica. Aspectos clinicos y serologicos. Biomedica 1981; 1(1): 16-22.		1	16.5															COLOMBIA	COLOMBIA	0	0	0	1	0	0	0	0	0	0	0	0	1	0	0	0		1		0.7857	3	1	0	0	1	1	0
EN	full	1981	Castaneda et al. Histoplasmosis epidemica. Aspectos clinicos y serologicos. Biomedica 1981; 1(1): 16-22.		1	16.5															COLOMBIA	COLOMBIA	0	0	0	1	0	0	0	0	0	0	0	0	1	0	0	0		1		0.7857	3	1	0	0	1	1	0
EN	full	1981	Castaneda et al. Histoplasmosis epidemica. Aspectos clinicos y serologicos. Biomedica 1981; 1(1): 16-22.		1	16.5															COLOMBIA	COLOMBIA	0	0	0	1	0	0	0	0	0	0	0	0	1	0	0	0		1		0.7857	3	1	0	0	1	1	0
EN	full	2012	Corti et al, Brote de histoplasmosis de primoinfeccion en cinco hermanas. Rev Pat Trop 41(1); 103-110.		0	15															ARGENTINA	ARGENTINA	0	0	0	1	0	0	0	0				0	0	1	0	1		1		0.7142	3	1	1	0	1	1	0
EN	full	2012	Corti et al, Brote de histoplasmosis de primoinfeccion en cinco hermanas. Rev Pat Trop 41(1); 103-110.		0	12															ARGENTINA	ARGENTINA	0	0	0	1	0	0	0	0				0	0	1	0	1		1		0.7142	3	1	1	0	0	0	0
EN	full	2012	Corti et al, Brote de histoplasmosis de primoinfeccion en cinco hermanas. Rev Pat Trop 41(1); 103-110.		0	9															ARGENTINA	ARGENTINA	0	0	0	1	0	0	0	0				0	0	1	0	1		1		0.7142	3	1	1	0	0	0	0
EN	full	2012	Corti et al, Brote de histoplasmosis de primoinfeccion en cinco hermanas. Rev Pat Trop 41(1); 103-110.		0	1															ARGENTINA	ARGENTINA	0	0	0	1	0	0	0	0				0	0	1	0	1		1		0.7142	3	1	1	0	0	0	0
EN	full	2013	cottle et al. A multinational outbreak of histoplasmosis following a biology field trip in the ugandan rainforest. J travel med 2013; 20:83-87		1	24	MADAGASCAR	no	TOURISM	0	1	0	0	student	AFRICA	no	1	0	1	no	POLAND	UGANDA	0	0	0	0	1	0	0	0	UGANDA	west, near fort portal	4	1	0	0	1	0	no	1		0.5	2	1	1	0	1	1	1
EN	full	2013	cottle et al. A multinational outbreak of histoplasmosis following a biology field trip in the ugandan rainforest. J travel med 2013; 20:83-87		1	24	POLAND	no	TOURISM	0	1	0	0	student	AFRICA	no	1	0	1	no	UK	UGANDA	0	0	0	0	1	0	0	0	UGANDA	west, near fort portal	4	1	0	0	1	0	no	1		0.5	2	1	1	0	1	1	0
EN	full	2013	cottle et al. A multinational outbreak of histoplasmosis following a biology field trip in the ugandan rainforest. J travel med 2013; 20:83-87		0	23	SOUTH AFRICA	no	TOURISM	0	1	0	0	student	AFRICA	no	1	0	1	no	NETHERLANDS	UGANDA	0	0	0	0	1	0	0	0	UGANDA	west, near fort portal	4	1	0	0	1	0	no	1		0.5	2	1	1	0	1	1	1
EN	full	2013	cottle et al. A multinational outbreak of histoplasmosis following a biology field trip in the ugandan rainforest. J travel med 2013; 20:83-87		0	24	SWISS	no	TOURISM	0	1	0	0	student	AFRICA	no	1	0	1	no	KENYA	UGANDA	0	0	0	0	1	0	0	0	UGANDA	west, near fort portal	4	1	0	0	1	0	no	1		0.5	2	1	0	0	1	0	1
EN	full	2013	cottle et al. A multinational outbreak of histoplasmosis following a biology field trip in the ugandan rainforest. J travel med 2013; 20:83-87		1	31	AUSTRIA	no	TOURISM	0	1	0	0	student	AFRICA	no	1	0	1	no	MADAGASCAR	UGANDA	0	0	0	0	1	0	0	0	UGANDA	west, near fort portal	4	1	0	0	1	0	no	1		0.5	2	1				1
EN	full	2013	cottle et al. A multinational outbreak of histoplasmosis following a biology field trip in the ugandan rainforest. J travel med 2013; 20:83-87		0	22	UK	no	TOURISM	0	1	0	0	student	AFRICA	no	1	0	1	no	NETHERLANDS	UGANDA	0	0	0	0	1	0	0	0	UGANDA	west, near fort portal	4	1	0	0	1	0	no	1		0.5	2	1	1	0	1	0	1
EN	full	2013	cottle et al. A multinational outbreak of histoplasmosis following a biology field trip in the ugandan rainforest. J travel med 2013; 20:83-87		1	21	UK	no	TOURISM	0	1	0	0	student	AFRICA	no	1	0	1	no	UK	UGANDA	0	0	0	0	1	0	0	0	UGANDA	west, near fort portal	4	1	0	0	1	0	no	1		0.5	2	1	0	0	1	0	1
EN	full	2013	cottle et al. A multinational outbreak of histoplasmosis following a biology field trip in the ugandan rainforest. J travel med 2013; 20:83-87		0	23	IRELAND	no	TOURISM	0	1	0	0	student	AFRICA	no	1	0	1	no	SWISS	UGANDA	0	0	0	0	1	0	0	0	UGANDA	west, near fort portal	4	1	0	0	1	0	no	1		0.5	2	1	0	0	1	1	1
EN	full	2013	cottle et al. A multinational outbreak of histoplasmosis following a biology field trip in the ugandan rainforest. J travel med 2013; 20:83-87		0	27	KENYA	no	TOURISM	0	1	0	0	student	AFRICA	no	1	0	1	no	IRELAND	UGANDA	0	0	0	0	1	0	0	0	UGANDA	west, near fort portal	4	1	0	0	1	0	no	1		0.5	2	1	1	0	1	1	0
EN	full	2013	cottle et al. A multinational outbreak of histoplasmosis following a biology field trip in the ugandan rainforest. J travel med 2013; 20:83-87	12	0	24	NETHERLANDS	no	TOURISM	0	1	0	0	student	AFRICA	no	1	0	1	no	SWEDEN	UGANDA	0	0	0	0	1	0	0	0	UGANDA	west, near fort portal	4	1	0	0	1	0	no	1	12/24	0.5	2	1	0	0	1	0	1
EN	full	2013	cottle et al. A multinational outbreak of histoplasmosis following a biology field trip in the ugandan rainforest. J travel med 2013; 20:83-87		1	25	SWEDEN	no	TOURISM	0	1	0	0	student	AFRICA	no	1	0	1	no	AUSTRIA	UGANDA	0	0	0	0	1	0	0	0	UGANDA	west, near fort portal	4	1	0	0	1	0	no	1		0.5	2	1	1	0	1	0	1
EN	full	2013	cottle et al. A multinational outbreak of histoplasmosis following a biology field trip in the ugandan rainforest. J travel med 2013; 20:83-87		1		NETHERLANDS	no	TOURISM	0	1	0	0	student	AFRICA	no	1	0	1	no	SOUTH AFRICA	UGANDA	0	0	0	0	1	0	0	0	UGANDA	west, near fort portal	4	1	0	0	1	0	no	1		0.5	2	1				0
EN	full	1979	Craven, S. A. and S. R. Benatar (1979). "Histoplasmosis in the Cape Province. A report of the second known outbreak." S Afr Med J 55(3): 89-92.	10					SPELEOLOGIST	1	0	0	0	speleologist	SOUTH AFRICA	no	1	0	1	no		SOUTH AFRICA	0	0	0	0	1	0	0	0	SOUTH AFRICA	de hoop cave	1		1	0	0	0	no	1	10/14	0.7143	3	1	1	0	1	1	1
EN	full	1979	Craven, S. A. and S. R. Benatar (1979). "Histoplasmosis in the Cape Province. A report of the second known outbreak." S Afr Med J 55(3): 89-92.						SPELEOLOGIST	1	0	0	0	speleologist	SOUTH AFRICA	no	1	0	1	no		SOUTH AFRICA	0	0	0	0	1	0	0	0	SOUTH AFRICA	de hoop cave	1		1	0	0	0	no	1		0.7143	3	1	1	0	1	1	1
EN	full	1979	Craven, S. A. and S. R. Benatar (1979). "Histoplasmosis in the Cape Province. A report of the second known outbreak." S Afr Med J 55(3): 89-92.						SPELEOLOGIST	1	0	0	0	speleologist	SOUTH AFRICA	no	1	0	1	no		SOUTH AFRICA	0	0	0	0	1	0	0	0	SOUTH AFRICA	de hoop cave	1		1	0	0	0	no	1		0.7143	3	1	1	0	1	1	1
EN	full	1979	Craven, S. A. and S. R. Benatar (1979). "Histoplasmosis in the Cape Province. A report of the second known outbreak." S Afr Med J 55(3): 89-92.						SPELEOLOGIST	1	0	0	0	speleologist	SOUTH AFRICA	no	1	0	1	no		SOUTH AFRICA	0	0	0	0	1	0	0	0	SOUTH AFRICA	de hoop cave	1		1	0	0	0	no	1		0.7143	3	1	1	0	1	1	1
EN	full	1979	Craven, S. A. and S. R. Benatar (1979). "Histoplasmosis in the Cape Province. A report of the second known outbreak." S Afr Med J 55(3): 89-92.						SPELEOLOGIST	1	0	0	0	speleologist	SOUTH AFRICA	no	1	0	1	no		SOUTH AFRICA	0	0	0	0	1	0	0	0	SOUTH AFRICA	de hoop cave	1		1	0	0	0	no	1		0.7143	3	1	1	0	1	1	1
EN	full	1979	Craven, S. A. and S. R. Benatar (1979). "Histoplasmosis in the Cape Province. A report of the second known outbreak." S Afr Med J 55(3): 89-92.						SPELEOLOGIST	1	0	0	0	speleologist	SOUTH AFRICA	no	1	0	1	no		SOUTH AFRICA	0	0	0	0	1	0	0	0	SOUTH AFRICA	de hoop cave	1		1	0	0	0	no	1		0.7143	3	1	1	0	1	1	1
EN	full	1979	Craven, S. A. and S. R. Benatar (1979). "Histoplasmosis in the Cape Province. A report of the second known outbreak." S Afr Med J 55(3): 89-92.						SPELEOLOGIST	1	0	0	0	speleologist	SOUTH AFRICA	no	1	0	1	no		SOUTH AFRICA	0	0	0	0	1	0	0	0	SOUTH AFRICA	de hoop cave	1		1	0	0	0	no	1		0.7143	3	1	1	0	1	1	1
EN	full	1979	Craven, S. A. and S. R. Benatar (1979). "Histoplasmosis in the Cape Province. A report of the second known outbreak." S Afr Med J 55(3): 89-92.						SPELEOLOGIST	1	0	0	0	speleologist	SOUTH AFRICA	no	1	0	1	no		SOUTH AFRICA	0	0	0	0	1	0	0	0	SOUTH AFRICA	de hoop cave	1		1	0	0	0	no	1		0.7143	3	1	1	0	1	1	1
EN	full	1979	Craven, S. A. and S. R. Benatar (1979). "Histoplasmosis in the Cape Province. A report of the second known outbreak." S Afr Med J 55(3): 89-92.					aortic valve replacement 1976	SPELEOLOGIST	1	0	0	0	speleologist	SOUTH AFRICA	no	1	0	1	no		SOUTH AFRICA	0	0	0	0	1	0	0	0	SOUTH AFRICA	de hoop cave	1		1	0	0	0	no	1		0.7143	3	1	1	0	1	1	1
biblio	full	1957	Dean. Cave disease. Cent Afr J Med. 1957 Mar;3(3):79-81	2	1		SOUTH AFRICA		SPELEOLOGIST	1	0	0	0	speleologist	SOUTH AFRICA	no	1	0	1	no	SOUTH AFRICA	SOUTH AFRICA	0	0	0	0	1	0	0	0	SOUTH AFRICA	urungwe reserve, mashonaland	1	0	1	0	0	0	no	1	2/3	0.6667	2	1	1
EN	full	2000	Farina, C., et al. (2000). "Imported and autochthonous histoplasmosis in Bergamo province, Northern Italy."Scand J Infect Dis32(3): 271-274.		0	45	ITALY	no	TOURISM	0	1	0	0	tourism	CENTRAL AMERICA	yes	0	1	0	no	ITALY	GUATEMALA	0	0	1	0	0	0	0	0	DOMINICAN REPUBLIC	cave for tourists a los patos, south east of the island	1	1	1	0	0	0	no		not possible		4	1	1	0			0
EN	full	2000	Farina, C., et al. (2000). "Imported and autochthonous histoplasmosis in Bergamo province, Northern Italy."Scand J Infect Dis32(3): 271-274.		0	53	ITALY	no	TOURISM	0	1	0	0	tourism	CENTRAL AMERICA	yes	0	1	0	no	ITALY	PERU	0	0	1	0	0	0	0	0	DOMINICAN REPUBLIC	cave for tourists a los patos, south east of the island	1	1	1	0	0	0	no		not possible		4	1	1	0	1		0
EN	full	2000	Farina, C., et al. (2000). "Imported and autochthonous histoplasmosis in Bergamo province, Northern Italy."Scand J Infect Dis32(3): 271-274.	3	1	29	ITALY	no	SPELEOLOGIST	1	0	0	0	speleologist	SOUTH AMERICA	yes	0	1	0	no	ITALY	DOMINICAN REPUBLIC	0	0	1	0	0	0	0	0	PERU	mato grosso	1	1	1	1	0	0	no		not possible		4	1	1	0	1	1	0
EN	full	2005	Farina, C., et al. (2005). "Imported and autochthonous histoplasmosis in Italy: new cases and old problems."Rev Iberoam Micol22(3): 169-171.	1	1	45	ITALY		PROFESSIONAL	0	0	1	0	professional travel	CENTRAL AMERICA	yes	0	1	0	no	ITALY	NICARAGUA, ANTIGUA	0	0	1	0	0	0	0	0	NICARAGUA, ANTIGUA	NR	4	1	0	0	1	1	dust	0	caso sporadico		4	1	1	0	0	0	0
EN	full	2003	Flor, A., et al. (2003). "[Acute pulmonary histoplasmosis in a Spanish traveller to Nicaragua: an imported disease case]."Rev Iberoam Micol20(1): 24-28.		1		SPAIN	no	TOURISM	0	1	0	0	tourism	CENTRAL AMERICA	yes	0	1	0	no	SPAIN	NICARAGUA	0	0	1	0	0	0	0	0	NICARAGUA	NR	1	1	1	0	1	0	mine	1		1	3	1	1	0	1	1	0
EN	full	2003	Flor, A., et al. (2003). "[Acute pulmonary histoplasmosis in a Spanish traveller to Nicaragua: an imported disease case]."Rev Iberoam Micol20(1): 24-28.		1		SPAIN	no	TOURISM	0	1	0	0	tourism	CENTRAL AMERICA	yes	0	1	0	no	SPAIN	NICARAGUA	0	0	1	0	0	0	0	0	NICARAGUA	NR	1	1	1	0	1	0	mine	1		1	3	1	1	0	1	1	0
EN	full	1988	Fuortes, L. and T. Hayes (1988). "An outbreak of acute histoplasmosis in a family."Am Fam Physician37(5): 128-132.			13	USA		TOURISM	0	1	0	0	tourism	USA	no	1	1	0	yes	USA	IOWA	1	0	0	0	0	0	0	0	IOWA	rural Marengo	3	0	0	1	1	0	dust	1		0.44	2	1	1	0	1	1	0
EN	full	1988	Fuortes, L. and T. Hayes (1988). "An outbreak of acute histoplasmosis in a family."Am Fam Physician37(5): 128-132.	11	1	50	USA		TOURISM	0	1	0	0	tourism	USA	no	1	1	0	yes	USA	IOWA	1	0	0	0	0	0	0	0	IOWA	rural Marengo	3	0	0	1	1	0	dust	1	11/25 (ATTACK RATE 40% entered, 0% not entered)	0.44	2	1	1	1	1	1	1
EN	full	1988	Fuortes, L. and T. Hayes (1988). "An outbreak of acute histoplasmosis in a family."Am Fam Physician37(5): 128-132.		0	36	USA		TOURISM	0	1	0	0	tourism	USA	no	1	1	0	yes	USA	IOWA	1	0	0	0	0	0	0	0	IOWA	rural Marengo	3	0	0	1	1	0	dust	1		0.44	2	1	1	1	1	1	1
EN	full	1988	Fuortes, L. and T. Hayes (1988). "An outbreak of acute histoplasmosis in a family."Am Fam Physician37(5): 128-132.		1	5	USA		TOURISM	0	1	0	0	tourism	USA	no	1	1	0	yes	USA	IOWA	1	0	0	0	0	0	0	0	IOWA	rural Marengo	3	0	0	1	1	0	dust	1		0.44	2	1	1	1	1	1	1
EN	full	1988	Fuortes, L. and T. Hayes (1988). "An outbreak of acute histoplasmosis in a family."Am Fam Physician37(5): 128-132.			27	USA		TOURISM	0	1	0	0	tourism	USA	no	1	1	0	yes	USA	IOWA	1	0	0	0	0	0	0	0	IOWA	rural Marengo	3	0	0	1	1	0	dust	1		0.44	2	1	1	1	1	1	1
EN	full	1988	Fuortes, L. and T. Hayes (1988). "An outbreak of acute histoplasmosis in a family."Am Fam Physician37(5): 128-132.			17	USA		TOURISM	0	1	0	0	tourism	USA	no	1	1	0	yes	USA	IOWA	1	0	0	0	0	0	0	0	IOWA	rural Marengo	3	0	0	1	1	0	dust	1		0.44	2	1	1	1	1	1	1
EN	full	1988	Fuortes, L. and T. Hayes (1988). "An outbreak of acute histoplasmosis in a family."Am Fam Physician37(5): 128-132.			20	USA		TOURISM	0	1	0	0	tourism	USA	no	1	1	0	yes	USA	IOWA	1	0	0	0	0	0	0	0	IOWA	rural Marengo	3	0	0	1	1	0	dust	1		0.44	2	1	1	1	1	1	1
EN	full	1988	Fuortes, L. and T. Hayes (1988). "An outbreak of acute histoplasmosis in a family."Am Fam Physician37(5): 128-132.			23	USA		TOURISM	0	1	0	0	tourism	USA	no	1	1	0	yes	USA	IOWA	1	0	0	0	0	0	0	0	IOWA	rural Marengo	3	0	0	1	1	0	dust	1		0.44	2	1	1	1	1	1	0
EN	full	1988	Fuortes, L. and T. Hayes (1988). "An outbreak of acute histoplasmosis in a family."Am Fam Physician37(5): 128-132.			41	USA		TOURISM	0	1	0	0	tourism	USA	no	1	1	0	yes	USA	IOWA	1	0	0	0	0	0	0	0	IOWA	rural Marengo	3	0	0	1	1	0	dust	1		0.44	2	1	1	1	1	1	1
EN	full	1988	Fuortes, L. and T. Hayes (1988). "An outbreak of acute histoplasmosis in a family."Am Fam Physician37(5): 128-132.				USA		TOURISM	0	1	0	0	tourism	USA	no	1	1	0	yes	USA	IOWA	1	0	0	0	0	0	0	0	IOWA	rural Marengo	3	0	0	1	1	0	dust	1		0.44	2	1	0	0	1	1	0
EN	full	1988	Fuortes, L. and T. Hayes (1988). "An outbreak of acute histoplasmosis in a family."Am Fam Physician37(5): 128-132.			18	USA		TOURISM	0	1	0	0	tourism	USA	no	1	1	0	yes	USA	IOWA	1	0	0	0	0	0	0	0	IOWA	rural Marengo	3	0	0	1	1	0	dust	1		0.44	2	1	1	1	1	0	1
EN	full	2005	Garcia-Vazquez, E., et al. (2005). "[Histoplasma capsulatum infection in a group of travelers to Guatemala]."Enferm Infecc Microbiol Clin23(5): 274-276.		0	22.5	SPAIN	no	VOLUNTEER	0	0	0	0	volunteer	CENTRAL AMERICA	yes	0	1	0	no	SPAIN	GUATEMALA	0	0	1	0	0	0	0	0	GUATEMALA	NR	4	1	0	0	1	1	building renovation	1		1	3	1	0	0	0	0	0
EN	full	2005	Garcia-Vazquez, E., et al. (2005). "[Histoplasma capsulatum infection in a group of travelers to Guatemala]."Enferm Infecc Microbiol Clin23(5): 274-276.		0	22.5	SPAIN	no	VOLUNTEER	0	0	0	0	volunteer	CENTRAL AMERICA	yes	0	1	0	no	SPAIN	GUATEMALA	0	0	1	0	0	0	0	0	GUATEMALA	NR	4	1	0	0	1	1	building renovation	1		1	3	1	0	0	0	0	0
EN	full	2005	Garcia-Vazquez, E., et al. (2005). "[Histoplasma capsulatum infection in a group of travelers to Guatemala]."Enferm Infecc Microbiol Clin23(5): 274-276.		0	22.5	SPAIN	no	VOLUNTEER	0	0	0	0	volunteer	CENTRAL AMERICA	yes	0	1	0	no	SPAIN	GUATEMALA	0	0	1	0	0	0	0	0	GUATEMALA	NR	4	1	0	0	1	1	building renovation	1		1	3	1	0	0	0	0	0
EN	full	2005	Garcia-Vazquez, E., et al. (2005). "[Histoplasma capsulatum infection in a group of travelers to Guatemala]."Enferm Infecc Microbiol Clin23(5): 274-276.		0	22.5	SPAIN	no	VOLUNTEER	0	0	0	0	volunteer	CENTRAL AMERICA	yes	0	1	0	no	SPAIN	GUATEMALA	0	0	1	0	0	0	0	0	GUATEMALA	NR	4	1	0	0	1	1	building renovation	1		1	3	1	0	0	0	0	0
EN	full	2005	Garcia-Vazquez, E., et al. (2005). "[Histoplasma capsulatum infection in a group of travelers to Guatemala]."Enferm Infecc Microbiol Clin23(5): 274-276.		0	22.5	SPAIN	no	VOLUNTEER	0	0	0	0	volunteer	CENTRAL AMERICA	yes	0	1	0	no	SPAIN	GUATEMALA	0	0	1	0	0	0	0	0	GUATEMALA	NR	4	1	0	0	1	1	building renovation	1		1	3	1	0	0	0	0	0
EN	full	2005	Garcia-Vazquez, E., et al. (2005). "[Histoplasma capsulatum infection in a group of travelers to Guatemala]."Enferm Infecc Microbiol Clin23(5): 274-276.		0	22.5	SPAIN	no	VOLUNTEER	0	0	0	0	volunteer	CENTRAL AMERICA	yes	0	1	0	no	SPAIN	GUATEMALA	0	0	1	0	0	0	0	0	GUATEMALA	NR	4	1	0	0	1	1	building renovation	1		1	3	1	0	0	0	0	0
EN	full	2005	Garcia-Vazquez, E., et al. (2005). "[Histoplasma capsulatum infection in a group of travelers to Guatemala]."Enferm Infecc Microbiol Clin23(5): 274-276.		1	22.5	SPAIN	no	VOLUNTEER	0	0	0	0	volunteer	CENTRAL AMERICA	yes	0	1	0	no	SPAIN	GUATEMALA	0	0	1	0	0	0	0	0	GUATEMALA	NR	4	1	0	0	1	1	building renovation	1		1	3	1	0	0	0	0	0
EN	full	2005	Garcia-Vazquez, E., et al. (2005). "[Histoplasma capsulatum infection in a group of travelers to Guatemala]."Enferm Infecc Microbiol Clin23(5): 274-276.		1	22.5	SPAIN	no	VOLUNTEER	0	0	0	0	volunteer	CENTRAL AMERICA	yes	0	1	0	no	SPAIN	GUATEMALA	0	0	1	0	0	0	0	0	GUATEMALA	NR	4	1	0	0	1	1	building renovation	1		1	3	1	0	0	0	0	0
EN	full	2005	Garcia-Vazquez, E., et al. (2005). "[Histoplasma capsulatum infection in a group of travelers to Guatemala]."Enferm Infecc Microbiol Clin23(5): 274-276.	9	0	22.5	SPAIN	no	VOLUNTEER	0	0	0	0	volunteer	CENTRAL AMERICA	yes	0	1	0	no	SPAIN	GUATEMALA	0	0	1	0	0	0	0	0	GUATEMALA	NR	4	1	0	0	1	1	building renovation	1	9/9	1	3	1	1	0	1	0	0
EN	full	1975	handzel and jessamine, imported histoplasmosis from puerto rico. Canadian journal of public health 1975, 66(5)393-395	6			CANADA	no	TOURISM	0	1	0	0	student	CENTRAL AMERICA	yes	0	1	0	no	CANADA	PUERTO RICO	0	0	1	0	0	0	0	0	PUERTO RICO	acquas buenas caves	1	1	1	0	1	0	dust	1	1	1	3	1	1	0	1	0	1
EN	full	1975	handzel and jessamine, imported histoplasmosis from puerto rico. Canadian journal of public health 1975, 66(5)393-395		0		CANADA	no	TOURISM	0	1	0	0	teacher	CENTRAL AMERICA	yes	0	1	0	no	CANADA	PUERTO RICO	0	0	1	0	0	0	0	0	PUERTO RICO	acquas buenas caves	1	1	1	0	1	0	dust	1		1	3	1	0	0	0	0	0
EN	full	1975	handzel and jessamine, imported histoplasmosis from puerto rico. Canadian journal of public health 1975, 66(5)393-395				CANADA	no	TOURISM	0	1	0	0	teacher	CENTRAL AMERICA	yes	0	1	0	no	CANADA	PUERTO RICO	0	0	1	0	0	0	0	0	PUERTO RICO	acquas buenas caves	1	1	1	0	1	0	dust	1		1	3	1	1	0	0	0	0
EN	full	1975	handzel and jessamine, imported histoplasmosis from puerto rico. Canadian journal of public health 1975, 66(5)393-395		1		CANADA	no	TOURISM	0	1	0	0	student	CENTRAL AMERICA	yes	0	1	0	no	CANADA	PUERTO RICO	0	0	1	0	0	0	0	0	PUERTO RICO	acquas buenas caves	1	1	1	0	1	0	dust	1		1	3	1	0	0	0	0	0
EN	full	1975	handzel and jessamine, imported histoplasmosis from puerto rico. Canadian journal of public health 1975, 66(5)393-395		0		CANADA	no	TOURISM	0	1	0	0	teacher	CENTRAL AMERICA	yes	0	1	0	no	CANADA	PUERTO RICO	0	0	1	0	0	0	0	0	PUERTO RICO	acquas buenas caves	1	1	1	0	1	0	dust	1		1	3	1
EN	full	1975	handzel and jessamine, imported histoplasmosis from puerto rico. Canadian journal of public health 1975, 66(5)393-395		1		CANADA	no	TOURISM	0	1	0	0	student	CENTRAL AMERICA	yes	0	1	0	no	CANADA	PUERTO RICO	0	0	1	0	0	0	0	0	PUERTO RICO	acquas buenas caves	1	1	1	0	1	0	dust	1		1	3	1	0	0	0	0	0
EN	full	1979	Hay, R. J. (1979). "Mycoses imported from the West Indies. A report of three cases."Postgrad Med J55(647): 603-604.	1	1	31	JAMAICA		TOURISM	0	1	0	0	teacher	CENTRAL AMERICA	yes	0	1	0	no	JAMAICA	CARIBBEAN	0	0	1	0	0	0	0	0	CARIBBEAN	NR	1	1	1	0	0	0	no		not possible		4	1	1	0	1	1	0
EN	full	1996	Hirsch, D., et al. (1996). "[Pulmonary histoplasmoma after travel abroad]."Pneumologie50(3): 242-244.	1	0	10	GERMANY	no	TOURISM	0	1	0	0	tourism	SOUTH EAST ASIA	no	1	0	1	no	GERMANY	CENTRAL AMERICA, THAILANDIA	0	0	0	0	0	1	1	0	CENTRAL AMERICA, THAILANDIA	NR	4	1	0	0	1	0	NR	0	caso sporadico		4	1	1	0	1	1	0
biblio	full	2003	Kiessling, F., et al. (2003). "[Pulmonary nodules in a patient with high temperature. Acute pulmonary histoplasmosis]."Radiologe43(10): 856-860.	1	1	45	GERMANY			0	0	0	0		CENTRAL AMERICA	yes	0	1	0	no	GERMANY	CENTRAL AMERICA	0	0	1	0	0	0	0	0	CENTRAL AMERICA	MEXICO, BRASIL	4	1	0	0	1	0	NR	0	caso sporadico		4	1	1	0	1	1	0
EN	full	2011	locatelli sanchez, mornex et al. Pulmonary nodules upon return from Costa Rica. Rev mal resp 2011 sep; 28(7):938-9	2	1	49	FRANCE	no	TOURISM	0	1	0	0	tourism	CENTRAL AMERICA	yes	0	1	0	no	FRANCE	COSTA RICA	0	0	1	0	0	0	0	0	COSTA RICA	NR	4	1	0	0	1	0	NR	1	2/2	1	3	1	1	0	1	1	0
EN	full	2011	locatelli sanchez, mornex et al. Pulmonary nodules upon return from Costa Rica. Rev mal resp 2011 sep; 28(7):938-9		0		FRANCE	no	TOURISM	0	1	0	0	tourism	CENTRAL AMERICA	yes	0	1	0	no	FRANCE	COSTA RICA	0	0	1	0	0	0	0	0	COSTA RICA	NR	4	1	0	0	1	0	NR	1		1	3	1	1	0	1	1	0
EN	full	1979	Lottenberg, R., et al. (1979). "Pulmonary histoplasmosis associated with exploration of a bat cave."Am J Epidemiol110(2): 156-161.						VOLUNTEER	0	0	0	1	volunteer	USA	no	1	1	0	yes	USA	FLORIDA	1	0	0	0	0	0	0	0	FLORIDA	Suwannee County, north centre Florida	1		1	0	1	0	dust	1		0.931	3	1	1	0	1	1	1
EN	full	1979	Lottenberg, R., et al. (1979). "Pulmonary histoplasmosis associated with exploration of a bat cave."Am J Epidemiol110(2): 156-161.						VOLUNTEER	0	0	0	1	volunteer	USA	no	1	1	0	yes		FLORIDA	1	0	0	0	0	0	0	0	FLORIDA	Suwannee County, north centre Florida	1		1	0	1	0	dust	1		0.931	3	1	1	0	1	1	1
EN	full	1979	Lottenberg, R., et al. (1979). "Pulmonary histoplasmosis associated with exploration of a bat cave."Am J Epidemiol110(2): 156-161.						VOLUNTEER	0	0	0	1	volunteer	USA	no	1	1	0	yes		FLORIDA	1	0	0	0	0	0	0	0	FLORIDA	Suwannee County, north centre Florida	1		1	0	1	0	dust	1		0.931	3	1	1	0	1	1	1
EN	full	1979	Lottenberg, R., et al. (1979). "Pulmonary histoplasmosis associated with exploration of a bat cave."Am J Epidemiol110(2): 156-161.						VOLUNTEER	0	0	0	1	volunteer	USA	no	1	1	0	yes		FLORIDA	1	0	0	0	0	0	0	0	FLORIDA	Suwannee County, north centre Florida	1		1	0	1	0	dust	1		0.931	3	1	1	0	1	1	1
EN	full	1979	Lottenberg, R., et al. (1979). "Pulmonary histoplasmosis associated with exploration of a bat cave."Am J Epidemiol110(2): 156-161.						VOLUNTEER	0	0	0	1	volunteer	USA	no	1	1	0	yes		FLORIDA	1	0	0	0	0	0	0	0	FLORIDA	Suwannee County, north centre Florida	1		1	0	1	0	dust	1		0.931	3	1	1	0	1	1	1
EN	full	1979	Lottenberg, R., et al. (1979). "Pulmonary histoplasmosis associated with exploration of a bat cave."Am J Epidemiol110(2): 156-161.						VOLUNTEER	0	0	0	1	volunteer	USA	no	1	1	0	yes		FLORIDA	1	0	0	0	0	0	0	0	FLORIDA	Suwannee County, north centre Florida	1		1	0	1	0	dust	1		0.931	3	1	1	0	1	1	1
EN	full	1979	Lottenberg, R., et al. (1979). "Pulmonary histoplasmosis associated with exploration of a bat cave."Am J Epidemiol110(2): 156-161.						VOLUNTEER	0	0	0	1	volunteer	USA	no	1	1	0	yes		FLORIDA	1	0	0	0	0	0	0	0	FLORIDA	Suwannee County, north centre Florida	1		1	0	1	0	dust	1		0.931	3	1	1	0	1	1	1
EN	full	1979	Lottenberg, R., et al. (1979). "Pulmonary histoplasmosis associated with exploration of a bat cave."Am J Epidemiol110(2): 156-161.						VOLUNTEER	0	0	0	1	volunteer	USA	no	1	1	0	yes		FLORIDA	1	0	0	0	0	0	0	0	FLORIDA	Suwannee County, north centre Florida	1		1	0	1	0	dust	1		0.931	3	1	1	0	1	1	1
EN	full	1979	Lottenberg, R., et al. (1979). "Pulmonary histoplasmosis associated with exploration of a bat cave."Am J Epidemiol110(2): 156-161.						VOLUNTEER	0	0	0	1	volunteer	USA	no	1	1	0	yes		FLORIDA	1	0	0	0	0	0	0	0	FLORIDA	Suwannee County, north centre Florida	1		1	0	1	0	dust	1		0.931	3	1	1	0	1	1	1
EN	full	1979	Lottenberg, R., et al. (1979). "Pulmonary histoplasmosis associated with exploration of a bat cave."Am J Epidemiol110(2): 156-161.						VOLUNTEER	0	0	0	1	volunteer	USA	no	1	1	0	yes		FLORIDA	1	0	0	0	0	0	0	0	FLORIDA	Suwannee County, north centre Florida	1		1	0	1	0	dust	1		0.931	3	1	1	0	1	1	1
EN	full	1979	Lottenberg, R., et al. (1979). "Pulmonary histoplasmosis associated with exploration of a bat cave."Am J Epidemiol110(2): 156-161.						VOLUNTEER	0	0	0	1	volunteer	USA	no	1	1	0	yes		FLORIDA	1	0	0	0	0	0	0	0	FLORIDA	Suwannee County, north centre Florida	1		1	0	1	0	dust	1		0.931	3	1	1	0	1	1	1
EN	full	1979	Lottenberg, R., et al. (1979). "Pulmonary histoplasmosis associated with exploration of a bat cave."Am J Epidemiol110(2): 156-161.						VOLUNTEER	0	0	0	1	volunteer	USA	no	1	1	0	yes		FLORIDA	1	0	0	0	0	0	0	0	FLORIDA	Suwannee County, north centre Florida	1		1	0	1	0	dust	1		0.931	3	1	1	0	1	1	1
EN	full	1979	Lottenberg, R., et al. (1979). "Pulmonary histoplasmosis associated with exploration of a bat cave."Am J Epidemiol110(2): 156-161.						VOLUNTEER	0	0	0	1	volunteer	USA	no	1	1	0	yes		FLORIDA	1	0	0	0	0	0	0	0	FLORIDA	Suwannee County, north centre Florida	1		1	0	1	0	dust	1		0.931	3	1	1	0	1	1	1
EN	full	1979	Lottenberg, R., et al. (1979). "Pulmonary histoplasmosis associated with exploration of a bat cave."Am J Epidemiol110(2): 156-161.						VOLUNTEER	0	0	0	1	volunteer	USA	no	1	1	0	yes		FLORIDA	1	0	0	0	0	0	0	0	FLORIDA	Suwannee County, north centre Florida	1		1	0	1	0	dust	1		0.931	3	1	1	0	1	1	1
EN	full	1979	Lottenberg, R., et al. (1979). "Pulmonary histoplasmosis associated with exploration of a bat cave."Am J Epidemiol110(2): 156-161.						VOLUNTEER	0	0	0	1	volunteer	USA	no	1	1	0	yes		FLORIDA	1	0	0	0	0	0	0	0	FLORIDA	Suwannee County, north centre Florida	1		1	0	1	0	dust	1		0.931	3	1	1	0	1	1	1
EN	full	1979	Lottenberg, R., et al. (1979). "Pulmonary histoplasmosis associated with exploration of a bat cave."Am J Epidemiol110(2): 156-161.						VOLUNTEER	0	0	0	1	volunteer	USA	no	1	1	0	yes		FLORIDA	1	0	0	0	0	0	0	0	FLORIDA	Suwannee County, north centre Florida	1		1	0	1	0	dust	1		0.931	3	1	1	0	1	1	1
EN	full	1979	Lottenberg, R., et al. (1979). "Pulmonary histoplasmosis associated with exploration of a bat cave."Am J Epidemiol110(2): 156-161.	27	0	18	USA		TOURISM	0	1	0	0	tourism	USA	no	1	1	0	yes		FLORIDA	1	0	0	0	0	0	0	0	FLORIDA	north-centre	1		1	0	0	0	no	1	27/29	0.931	3	1	0	0	1	0	1
EN	full	2004	Lyon, G. M., et al. (2004). "Histoplasmosis associated with exploring a bat-inhabited cave in Costa Rica, 1998-1999."Am J Trop Med Hyg70(4): 438-442.	10	0	14	USA		TOURISM	0	1	0	0	tourism	CENTRAL AMERICA	yes	0	1	0	no	USA	COSTA RICA	0	0	1	0	0	0	0	0	COSTA RICA	NR	1	1	1	0	0	0	no	1	9/10	0.9	3	1	1	0	1	1	1
EN	full	2004	Lyon, G. M., et al. (2004). "Histoplasmosis associated with exploring a bat-inhabited cave in Costa Rica, 1998-1999."Am J Trop Med Hyg70(4): 438-442.		0	14	USA		TOURISM	0	1	0	0	tourism	CENTRAL AMERICA	yes	0	1	0	no	USA	COSTA RICA	0	0	1	0	0	0	0	0	COSTA RICA	NR	1	1	1	0	0	0	no	1		0.9	3	1	1	0	1	1	1
EN	full	2004	Lyon, G. M., et al. (2004). "Histoplasmosis associated with exploring a bat-inhabited cave in Costa Rica, 1998-1999."Am J Trop Med Hyg70(4): 438-442.		0	14	USA		TOURISM	0	1	0	0	tourism	CENTRAL AMERICA	yes	0	1	0	no	USA	COSTA RICA	0	0	1	0	0	0	0	0	COSTA RICA	NR	1	1	1	0	0	0	no	1		0.9	3	1	1	0	1	1	1
EN	full	2004	Lyon, G. M., et al. (2004). "Histoplasmosis associated with exploring a bat-inhabited cave in Costa Rica, 1998-1999."Am J Trop Med Hyg70(4): 438-442.		0	14	USA		TOURISM	0	1	0	0	tourism	CENTRAL AMERICA	yes	0	1	0	no	USA	COSTA RICA	0	0	1	0	0	0	0	0	COSTA RICA	NR	1	1	1	0	0	0	no	1		0.9	3	1	1	0	1	1	1
EN	full	2004	Lyon, G. M., et al. (2004). "Histoplasmosis associated with exploring a bat-inhabited cave in Costa Rica, 1998-1999."Am J Trop Med Hyg70(4): 438-442.		0	14	USA		TOURISM	0	1	0	0	tourism	CENTRAL AMERICA	yes	0	1	0	no	USA	COSTA RICA	0	0	1	0	0	0	0	0	COSTA RICA	NR	1	1	1	0	0	0	no	1		0.9	3	1	1	0	1	1	1
EN	full	2004	Lyon, G. M., et al. (2004). "Histoplasmosis associated with exploring a bat-inhabited cave in Costa Rica, 1998-1999."Am J Trop Med Hyg70(4): 438-442.		0	14	USA		TOURISM	0	1	0	0	tourism	CENTRAL AMERICA	yes	0	1	0	no	USA	COSTA RICA	0	0	1	0	0	0	0	0	COSTA RICA	NR	1	1	1	0	0	0	no	1		0.9	3	1	1	0	1	1	1
EN	full	2004	Lyon, G. M., et al. (2004). "Histoplasmosis associated with exploring a bat-inhabited cave in Costa Rica, 1998-1999."Am J Trop Med Hyg70(4): 438-442.		1	14	USA		TOURISM	0	1	0	0	tourism	CENTRAL AMERICA	yes	0	1	0	no	USA	COSTA RICA	0	0	1	0	0	0	0	0	COSTA RICA	NR	1	1	1	0	0	0	no	1		0.9	3	1	1	0	1	1	1
EN	full	2004	Lyon, G. M., et al. (2004). "Histoplasmosis associated with exploring a bat-inhabited cave in Costa Rica, 1998-1999."Am J Trop Med Hyg70(4): 438-442.		1	14	USA		TOURISM	0	1	0	0	tourism	CENTRAL AMERICA	yes	0	1	0	no	USA	COSTA RICA	0	0	1	0	0	0	0	0	COSTA RICA	NR	1	1	1	0	0	0	no	1		0.9	3	1	1	0	1	1	1
EN	full	2004	Lyon, G. M., et al. (2004). "Histoplasmosis associated with exploring a bat-inhabited cave in Costa Rica, 1998-1999."Am J Trop Med Hyg70(4): 438-442.		1	14	USA		TOURISM	0	1	0	0	tourism	CENTRAL AMERICA	yes	0	1	0	no	USA	COSTA RICA	0	0	1	0	0	0	0	0	COSTA RICA	NR	1	1	1	0	0	0	no	1		0.9	3	1	1	0	1	1	1
EN	full	2003	Morgan, J., et al. (2003). "A large outbreak of histoplasmosis among American travelers associated with a hotel in Acapulco, Mexico, spring 2001."Am J Trop Med Hyg69(6): 663-669.	262(148)	1	21	USA		TOURISM	0	1	0	0	student	NORTH AMERICA	yes	0	1	0	yes	USA	MEXICO	0	1	0	0	0	0	0	0	MEXICO	acapulco	4	1	0	0	0	1	hotel		not possible		4	1	1	0	1	1	1
EN	full	2003	Morgan, J., et al. (2003). "A large outbreak of histoplasmosis among American travelers associated with a hotel in Acapulco, Mexico, spring 2001."Am J Trop Med Hyg69(6): 663-669.	262(148)	1	21	USA		TOURISM	0	1	0	0	student	NORTH AMERICA	yes	0	1	0	yes	USA	MEXICO	0	1	0	0	0	0	0	0	MEXICO	acapulco	4	1	0	0	0	1	hotel				4	1	1	0	1	1	1
EN	full	2003	Morgan, J., et al. (2003). "A large outbreak of histoplasmosis among American travelers associated with a hotel in Acapulco, Mexico, spring 2001."Am J Trop Med Hyg69(6): 663-669.	262(148)	1	21	USA		TOURISM	0	1	0	0	student	NORTH AMERICA	yes	0	1	0	yes	USA	MEXICO	0	1	0	0	0	0	0	0	MEXICO	acapulco	4	1	0	0	0	1	hotel				4	1	1	0	1	1	1
EN	full	2003	Morgan, J., et al. (2003). "A large outbreak of histoplasmosis among American travelers associated with a hotel in Acapulco, Mexico, spring 2001."Am J Trop Med Hyg69(6): 663-669.	262(148)	1	21	USA		TOURISM	0	1	0	0	student	NORTH AMERICA	yes	0	1	0	yes	USA	MEXICO	0	1	0	0	0	0	0	0	MEXICO	acapulco	4	1	0	0	0	1	hotel				4	1	1	0	1	1	1
EN	full	2003	Morgan, J., et al. (2003). "A large outbreak of histoplasmosis among American travelers associated with a hotel in Acapulco, Mexico, spring 2001."Am J Trop Med Hyg69(6): 663-669.	262(148)	1	21	USA		TOURISM	0	1	0	0	student	NORTH AMERICA	yes	0	1	0	yes	USA	MEXICO	0	1	0	0	0	0	0	0	MEXICO	acapulco	4	1	0	0	0	1	hotel				4	1	1	0	1	1	1
EN	full	2003	Morgan, J., et al. (2003). "A large outbreak of histoplasmosis among American travelers associated with a hotel in Acapulco, Mexico, spring 2001."Am J Trop Med Hyg69(6): 663-669.	262(148)	1	21	USA		TOURISM	0	1	0	0	student	NORTH AMERICA	yes	0	1	0	yes	USA	MEXICO	0	1	0	0	0	0	0	0	MEXICO	acapulco	4	1	0	0	0	1	hotel				4	1	1	0	1	1	1
EN	full	2003	Morgan, J., et al. (2003). "A large outbreak of histoplasmosis among American travelers associated with a hotel in Acapulco, Mexico, spring 2001."Am J Trop Med Hyg69(6): 663-669.	262(148)	1	21	USA		TOURISM	0	1	0	0	student	NORTH AMERICA	yes	0	1	0	yes	USA	MEXICO	0	1	0	0	0	0	0	0	MEXICO	acapulco	4	1	0	0	0	1	hotel				4	1	1	0	1	1	1
EN	full	2003	Morgan, J., et al. (2003). "A large outbreak of histoplasmosis among American travelers associated with a hotel in Acapulco, Mexico, spring 2001."Am J Trop Med Hyg69(6): 663-669.	262(148)	1	21	USA		TOURISM	0	1	0	0	student	NORTH AMERICA	yes	0	1	0	yes	USA	MEXICO	0	1	0	0	0	0	0	0	MEXICO	acapulco	4	1	0	0	0	1	hotel				4	1	1	0	1	1	1
EN	full	2003	Morgan, J., et al. (2003). "A large outbreak of histoplasmosis among American travelers associated with a hotel in Acapulco, Mexico, spring 2001."Am J Trop Med Hyg69(6): 663-669.	262(148)	1	21	USA		TOURISM	0	1	0	0	student	NORTH AMERICA	yes	0	1	0	yes	USA	MEXICO	0	1	0	0	0	0	0	0	MEXICO	acapulco	4	1	0	0	0	1	hotel				4	1	1	0	1	1	1
EN	full	2003	Morgan, J., et al. (2003). "A large outbreak of histoplasmosis among American travelers associated with a hotel in Acapulco, Mexico, spring 2001."Am J Trop Med Hyg69(6): 663-669.	262(148)	1	21	USA		TOURISM	0	1	0	0	student	NORTH AMERICA	yes	0	1	0	yes	USA	MEXICO	0	1	0	0	0	0	0	0	MEXICO	acapulco	4	1	0	0	0	1	hotel				4	1	1	0	1	1	1
EN	full	2003	Morgan, J., et al. (2003). "A large outbreak of histoplasmosis among American travelers associated with a hotel in Acapulco, Mexico, spring 2001."Am J Trop Med Hyg69(6): 663-669.	262(148)	1	21	USA		TOURISM	0	1	0	0	student	NORTH AMERICA	yes	0	1	0	yes	USA	MEXICO	0	1	0	0	0	0	0	0	MEXICO	acapulco	4	1	0	0	0	1	hotel				4	1	1	0	1	1	1
EN	full	2003	Morgan, J., et al. (2003). "A large outbreak of histoplasmosis among American travelers associated with a hotel in Acapulco, Mexico, spring 2001."Am J Trop Med Hyg69(6): 663-669.	262(148)	1	21	USA		TOURISM	0	1	0	0	student	NORTH AMERICA	yes	0	1	0	yes	USA	MEXICO	0	1	0	0	0	0	0	0	MEXICO	acapulco	4	1	0	0	0	1	hotel				4	1	1	0	1	1	1
EN	full	2003	Morgan, J., et al. (2003). "A large outbreak of histoplasmosis among American travelers associated with a hotel in Acapulco, Mexico, spring 2001."Am J Trop Med Hyg69(6): 663-669.	262(148)	1	21	USA		TOURISM	0	1	0	0	student	NORTH AMERICA	yes	0	1	0	yes	USA	MEXICO	0	1	0	0	0	0	0	0	MEXICO	acapulco	4	1	0	0	0	1	hotel				4	1	1	0	1	1	1
EN	full	2003	Morgan, J., et al. (2003). "A large outbreak of histoplasmosis among American travelers associated with a hotel in Acapulco, Mexico, spring 2001."Am J Trop Med Hyg69(6): 663-669.	262(148)	1	21	USA		TOURISM	0	1	0	0	student	NORTH AMERICA	yes	0	1	0	yes	USA	MEXICO	0	1	0	0	0	0	0	0	MEXICO	acapulco	4	1	0	0	0	1	hotel				4	1	1	0	1	1	1
EN	full	2003	Morgan, J., et al. (2003). "A large outbreak of histoplasmosis among American travelers associated with a hotel in Acapulco, Mexico, spring 2001."Am J Trop Med Hyg69(6): 663-669.	262(148)	1	21	USA		TOURISM	0	1	0	0	student	NORTH AMERICA	yes	0	1	0	yes	USA	MEXICO	0	1	0	0	0	0	0	0	MEXICO	acapulco	4	1	0	0	0	1	hotel				4	1	1	0	1	1	1
EN	full	2003	Morgan, J., et al. (2003). "A large outbreak of histoplasmosis among American travelers associated with a hotel in Acapulco, Mexico, spring 2001."Am J Trop Med Hyg69(6): 663-669.	262(148)	1	21	USA		TOURISM	0	1	0	0	student	NORTH AMERICA	yes	0	1	0	yes	USA	MEXICO	0	1	0	0	0	0	0	0	MEXICO	acapulco	4	1	0	0	0	1	hotel				4	1	1	0	1	1	1
EN	full	2003	Morgan, J., et al. (2003). "A large outbreak of histoplasmosis among American travelers associated with a hotel in Acapulco, Mexico, spring 2001."Am J Trop Med Hyg69(6): 663-669.	262(148)	1	21	USA		TOURISM	0	1	0	0	student	NORTH AMERICA	yes	0	1	0	yes	USA	MEXICO	0	1	0	0	0	0	0	0	MEXICO	acapulco	4	1	0	0	0	1	hotel				4	1	1	0	1	1	1
EN	full	2003	Morgan, J., et al. (2003). "A large outbreak of histoplasmosis among American travelers associated with a hotel in Acapulco, Mexico, spring 2001."Am J Trop Med Hyg69(6): 663-669.	262(148)	1	21	USA		TOURISM	0	1	0	0	student	NORTH AMERICA	yes	0	1	0	yes	USA	MEXICO	0	1	0	0	0	0	0	0	MEXICO	acapulco	4	1	0	0	0	1	hotel				4	1	1	0	1	1	1
EN	full	2003	Morgan, J., et al. (2003). "A large outbreak of histoplasmosis among American travelers associated with a hotel in Acapulco, Mexico, spring 2001."Am J Trop Med Hyg69(6): 663-669.	262(148)	1	21	USA		TOURISM	0	1	0	0	student	NORTH AMERICA	yes	0	1	0	yes	USA	MEXICO	0	1	0	0	0	0	0	0	MEXICO	acapulco	4	1	0	0	0	1	hotel				4	1	1	0	1	1	1
EN	full	2003	Morgan, J., et al. (2003). "A large outbreak of histoplasmosis among American travelers associated with a hotel in Acapulco, Mexico, spring 2001."Am J Trop Med Hyg69(6): 663-669.	262(148)	1	21	USA		TOURISM	0	1	0	0	student	NORTH AMERICA	yes	0	1	0	yes	USA	MEXICO	0	1	0	0	0	0	0	0	MEXICO	acapulco	4	1	0	0	0	1	hotel				4	1	1	0	1	1	1
EN	full	2003	Morgan, J., et al. (2003). "A large outbreak of histoplasmosis among American travelers associated with a hotel in Acapulco, Mexico, spring 2001."Am J Trop Med Hyg69(6): 663-669.	262(148)	1	21	USA		TOURISM	0	1	0	0	student	NORTH AMERICA	yes	0	1	0	yes	USA	MEXICO	0	1	0	0	0	0	0	0	MEXICO	acapulco	4	1	0	0	0	1	hotel				4	1	1	0	1	1	1
EN	full	2003	Morgan, J., et al. (2003). "A large outbreak of histoplasmosis among American travelers associated with a hotel in Acapulco, Mexico, spring 2001."Am J Trop Med Hyg69(6): 663-669.	262(148)	1	21	USA		TOURISM	0	1	0	0	student	NORTH AMERICA	yes	0	1	0	yes	USA	MEXICO	0	1	0	0	0	0	0	0	MEXICO	acapulco	4	1	0	0	0	1	hotel				4	1	1	0	1	1	1
EN	full	2003	Morgan, J., et al. (2003). "A large outbreak of histoplasmosis among American travelers associated with a hotel in Acapulco, Mexico, spring 2001."Am J Trop Med Hyg69(6): 663-669.	262(148)	1	21	USA		TOURISM	0	1	0	0	student	NORTH AMERICA	yes	0	1	0	yes	USA	MEXICO	0	1	0	0	0	0	0	0	MEXICO	acapulco	4	1	0	0	0	1	hotel				4	1	1	0	1	1	1
EN	full	2003	Morgan, J., et al. (2003). "A large outbreak of histoplasmosis among American travelers associated with a hotel in Acapulco, Mexico, spring 2001."Am J Trop Med Hyg69(6): 663-669.	262(148)	1	21	USA		TOURISM	0	1	0	0	student	NORTH AMERICA	yes	0	1	0	yes	USA	MEXICO	0	1	0	0	0	0	0	0	MEXICO	acapulco	4	1	0	0	0	1	hotel				4	1	1	0	1	1	1
EN	full	2003	Morgan, J., et al. (2003). "A large outbreak of histoplasmosis among American travelers associated with a hotel in Acapulco, Mexico, spring 2001."Am J Trop Med Hyg69(6): 663-669.	262(148)	1	21	USA		TOURISM	0	1	0	0	student	NORTH AMERICA	yes	0	1	0	yes	USA	MEXICO	0	1	0	0	0	0	0	0	MEXICO	acapulco	4	1	0	0	0	1	hotel				4	1	1	0	1	1	1
EN	full	2003	Morgan, J., et al. (2003). "A large outbreak of histoplasmosis among American travelers associated with a hotel in Acapulco, Mexico, spring 2001."Am J Trop Med Hyg69(6): 663-669.	262(148)	1	21	USA		TOURISM	0	1	0	0	student	NORTH AMERICA	yes	0	1	0	yes	USA	MEXICO	0	1	0	0	0	0	0	0	MEXICO	acapulco	4	1	0	0	0	1	hotel				4	1	1	0	1	1	1
EN	full	2003	Morgan, J., et al. (2003). "A large outbreak of histoplasmosis among American travelers associated with a hotel in Acapulco, Mexico, spring 2001."Am J Trop Med Hyg69(6): 663-669.	262(148)	1	21	USA		TOURISM	0	1	0	0	student	NORTH AMERICA	yes	0	1	0	yes	USA	MEXICO	0	1	0	0	0	0	0	0	MEXICO	acapulco	4	1	0	0	0	1	hotel				4	1	1	0	1	1	1
EN	full	2003	Morgan, J., et al. (2003). "A large outbreak of histoplasmosis among American travelers associated with a hotel in Acapulco, Mexico, spring 2001."Am J Trop Med Hyg69(6): 663-669.	262(148)	1	21	USA		TOURISM	0	1	0	0	student	NORTH AMERICA	yes	0	1	0	yes	USA	MEXICO	0	1	0	0	0	0	0	0	MEXICO	acapulco	4	1	0	0	0	1	hotel				4	1	1	0	1	1	1
EN	full	2003	Morgan, J., et al. (2003). "A large outbreak of histoplasmosis among American travelers associated with a hotel in Acapulco, Mexico, spring 2001."Am J Trop Med Hyg69(6): 663-669.	262(148)	1	21	USA		TOURISM	0	1	0	0	student	NORTH AMERICA	yes	0	1	0	yes	USA	MEXICO	0	1	0	0	0	0	0	0	MEXICO	acapulco	4	1	0	0	0	1	hotel				4	1	1	0	1	1	1
EN	full	2003	Morgan, J., et al. (2003). "A large outbreak of histoplasmosis among American travelers associated with a hotel in Acapulco, Mexico, spring 2001."Am J Trop Med Hyg69(6): 663-669.	262(148)	1	21	USA		TOURISM	0	1	0	0	student	NORTH AMERICA	yes	0	1	0	yes	USA	MEXICO	0	1	0	0	0	0	0	0	MEXICO	acapulco	4	1	0	0	0	1	hotel				4	1	1	0	1	1	1
EN	full	2003	Morgan, J., et al. (2003). "A large outbreak of histoplasmosis among American travelers associated with a hotel in Acapulco, Mexico, spring 2001."Am J Trop Med Hyg69(6): 663-669.	262(148)	1	21	USA		TOURISM	0	1	0	0	student	NORTH AMERICA	yes	0	1	0	yes	USA	MEXICO	0	1	0	0	0	0	0	0	MEXICO	acapulco	4	1	0	0	0	1	hotel				4	1	1	0	1	1	1
EN	full	2003	Morgan, J., et al. (2003). "A large outbreak of histoplasmosis among American travelers associated with a hotel in Acapulco, Mexico, spring 2001."Am J Trop Med Hyg69(6): 663-669.	262(148)	1	21	USA		TOURISM	0	1	0	0	student	NORTH AMERICA	yes	0	1	0	yes	USA	MEXICO	0	1	0	0	0	0	0	0	MEXICO	acapulco	4	1	0	0	0	1	hotel				4	1	1	0	1	1	1
EN	full	2003	Morgan, J., et al. (2003). "A large outbreak of histoplasmosis among American travelers associated with a hotel in Acapulco, Mexico, spring 2001."Am J Trop Med Hyg69(6): 663-669.	262(148)	1	21	USA		TOURISM	0	1	0	0	student	NORTH AMERICA	yes	0	1	0	yes	USA	MEXICO	0	1	0	0	0	0	0	0	MEXICO	acapulco	4	1	0	0	0	1	hotel				4	1	1	0	1	1	1
EN	full	2003	Morgan, J., et al. (2003). "A large outbreak of histoplasmosis among American travelers associated with a hotel in Acapulco, Mexico, spring 2001."Am J Trop Med Hyg69(6): 663-669.	262(148)	1	21	USA		TOURISM	0	1	0	0	student	NORTH AMERICA	yes	0	1	0	yes	USA	MEXICO	0	1	0	0	0	0	0	0	MEXICO	acapulco	4	1	0	0	0	1	hotel				4	1	1	0	1	1	0
EN	full	2003	Morgan, J., et al. (2003). "A large outbreak of histoplasmosis among American travelers associated with a hotel in Acapulco, Mexico, spring 2001."Am J Trop Med Hyg69(6): 663-669.	262(148)	1	21	USA		TOURISM	0	1	0	0	student	NORTH AMERICA	yes	0	1	0	yes	USA	MEXICO	0	1	0	0	0	0	0	0	MEXICO	acapulco	4	1	0	0	0	1	hotel				4	1	1	0	1	1	0
EN	full	2003	Morgan, J., et al. (2003). "A large outbreak of histoplasmosis among American travelers associated with a hotel in Acapulco, Mexico, spring 2001."Am J Trop Med Hyg69(6): 663-669.	262(148)	1	21	USA		TOURISM	0	1	0	0	student	NORTH AMERICA	yes	0	1	0	yes	USA	MEXICO	0	1	0	0	0	0	0	0	MEXICO	acapulco	4	1	0	0	0	1	hotel				4	1	1	0	0	0	0
EN	full	2003	Morgan, J., et al. (2003). "A large outbreak of histoplasmosis among American travelers associated with a hotel in Acapulco, Mexico, spring 2001."Am J Trop Med Hyg69(6): 663-669.	262(148)	1	21	USA		TOURISM	0	1	0	0	student	NORTH AMERICA	yes	0	1	0	yes	USA	MEXICO	0	1	0	0	0	0	0	0	MEXICO	acapulco	4	1	0	0	0	1	hotel				4	1	1	0	0	0	0
EN	full	2003	Morgan, J., et al. (2003). "A large outbreak of histoplasmosis among American travelers associated with a hotel in Acapulco, Mexico, spring 2001."Am J Trop Med Hyg69(6): 663-669.	262(148)	1	21	USA		TOURISM	0	1	0	0	student	NORTH AMERICA	yes	0	1	0	yes	USA	MEXICO	0	1	0	0	0	0	0	0	MEXICO	acapulco	4	1	0	0	0	1	hotel				4	1	1	0	0	0	0
EN	full	2003	Morgan, J., et al. (2003). "A large outbreak of histoplasmosis among American travelers associated with a hotel in Acapulco, Mexico, spring 2001."Am J Trop Med Hyg69(6): 663-669.	262(148)	1	21	USA		TOURISM	0	1	0	0	student	NORTH AMERICA	yes	0	1	0	yes	USA	MEXICO	0	1	0	0	0	0	0	0	MEXICO	acapulco	4	1	0	0	0	1	hotel				4	1	1	0	0	0	0
EN	full	2003	Morgan, J., et al. (2003). "A large outbreak of histoplasmosis among American travelers associated with a hotel in Acapulco, Mexico, spring 2001."Am J Trop Med Hyg69(6): 663-669.	262(148)	1	21	USA		TOURISM	0	1	0	0	student	NORTH AMERICA	yes	0	1	0	yes	USA	MEXICO	0	1	0	0	0	0	0	0	MEXICO	acapulco	4	1	0	0	0	1	hotel				4	1	1	0	0	0	0
EN	full	2003	Morgan, J., et al. (2003). "A large outbreak of histoplasmosis among American travelers associated with a hotel in Acapulco, Mexico, spring 2001."Am J Trop Med Hyg69(6): 663-669.	262(148)	1	21	USA		TOURISM	0	1	0	0	student	NORTH AMERICA	yes	0	1	0	yes	USA	MEXICO	0	1	0	0	0	0	0	0	MEXICO	acapulco	4	1	0	0	0	1	hotel				4	1	1	0	0	0	0
EN	full	2003	Morgan, J., et al. (2003). "A large outbreak of histoplasmosis among American travelers associated with a hotel in Acapulco, Mexico, spring 2001."Am J Trop Med Hyg69(6): 663-669.	262(148)	1	21	USA		TOURISM	0	1	0	0	student	NORTH AMERICA	yes	0	1	0	yes	USA	MEXICO	0	1	0	0	0	0	0	0	MEXICO	acapulco	4	1	0	0	0	1	hotel				4	1	1	0	0	0	0
EN	full	2003	Morgan, J., et al. (2003). "A large outbreak of histoplasmosis among American travelers associated with a hotel in Acapulco, Mexico, spring 2001."Am J Trop Med Hyg69(6): 663-669.	262(148)	1	21	USA		TOURISM	0	1	0	0	student	NORTH AMERICA	yes	0	1	0	yes	USA	MEXICO	0	1	0	0	0	0	0	0	MEXICO	acapulco	4	1	0	0	0	1	hotel				4	1	1	0	0	0	0
EN	full	2003	Morgan, J., et al. (2003). "A large outbreak of histoplasmosis among American travelers associated with a hotel in Acapulco, Mexico, spring 2001."Am J Trop Med Hyg69(6): 663-669.	262(148)	1	21	USA		TOURISM	0	1	0	0	student	NORTH AMERICA	yes	0	1	0	yes	USA	MEXICO	0	1	0	0	0	0	0	0	MEXICO	acapulco	4	1	0	0	0	1	hotel				4	1	1	0	0	0	0
EN	full	2003	Morgan, J., et al. (2003). "A large outbreak of histoplasmosis among American travelers associated with a hotel in Acapulco, Mexico, spring 2001."Am J Trop Med Hyg69(6): 663-669.	262(148)	1	21	USA		TOURISM	0	1	0	0	student	NORTH AMERICA	yes	0	1	0	yes	USA	MEXICO	0	1	0	0	0	0	0	0	MEXICO	acapulco	4	1	0	0	0	1	hotel				4	1	1	0	0	0	0
EN	full	2003	Morgan, J., et al. (2003). "A large outbreak of histoplasmosis among American travelers associated with a hotel in Acapulco, Mexico, spring 2001."Am J Trop Med Hyg69(6): 663-669.	262(148)	1	21	USA		TOURISM	0	1	0	0	student	NORTH AMERICA	yes	0	1	0	yes	USA	MEXICO	0	1	0	0	0	0	0	0	MEXICO	acapulco	4	1	0	0	0	1	hotel				4	1	1	0	0	0	0
EN	full	2003	Morgan, J., et al. (2003). "A large outbreak of histoplasmosis among American travelers associated with a hotel in Acapulco, Mexico, spring 2001."Am J Trop Med Hyg69(6): 663-669.	262(148)	1	21	USA		TOURISM	0	1	0	0	student	NORTH AMERICA	yes	0	1	0	yes	USA	MEXICO	0	1	0	0	0	0	0	0	MEXICO	acapulco	4	1	0	0	0	1	hotel				4	1	1	0	0	0	0
EN	full	2003	Morgan, J., et al. (2003). "A large outbreak of histoplasmosis among American travelers associated with a hotel in Acapulco, Mexico, spring 2001."Am J Trop Med Hyg69(6): 663-669.	262(148)	1	21	USA		TOURISM	0	1	0	0	student	NORTH AMERICA	yes	0	1	0	yes	USA	MEXICO	0	1	0	0	0	0	0	0	MEXICO	acapulco	4	1	0	0	0	1	hotel				4	1	1	0	0	0	0
EN	full	2003	Morgan, J., et al. (2003). "A large outbreak of histoplasmosis among American travelers associated with a hotel in Acapulco, Mexico, spring 2001."Am J Trop Med Hyg69(6): 663-669.	262(148)	1	21	USA		TOURISM	0	1	0	0	student	NORTH AMERICA	yes	0	1	0	yes	USA	MEXICO	0	1	0	0	0	0	0	0	MEXICO	acapulco	4	1	0	0	0	1	hotel				4	1	1	0	0	0	0
EN	full	2003	Morgan, J., et al. (2003). "A large outbreak of histoplasmosis among American travelers associated with a hotel in Acapulco, Mexico, spring 2001."Am J Trop Med Hyg69(6): 663-669.	262(148)	1	21	USA		TOURISM	0	1	0	0	student	NORTH AMERICA	yes	0	1	0	yes	USA	MEXICO	0	1	0	0	0	0	0	0	MEXICO	acapulco	4	1	0	0	0	1	hotel				4	1	1	0	0	0	0
EN	full	2003	Morgan, J., et al. (2003). "A large outbreak of histoplasmosis among American travelers associated with a hotel in Acapulco, Mexico, spring 2001."Am J Trop Med Hyg69(6): 663-669.	262(148)	1	21	USA		TOURISM	0	1	0	0	student	NORTH AMERICA	yes	0	1	0	yes	USA	MEXICO	0	1	0	0	0	0	0	0	MEXICO	acapulco	4	1	0	0	0	1	hotel				4	1	1	0	0	0	0
EN	full	2003	Morgan, J., et al. (2003). "A large outbreak of histoplasmosis among American travelers associated with a hotel in Acapulco, Mexico, spring 2001."Am J Trop Med Hyg69(6): 663-669.	262(148)	1	21	USA		TOURISM	0	1	0	0	student	NORTH AMERICA	yes	0	1	0	yes	USA	MEXICO	0	1	0	0	0	0	0	0	MEXICO	acapulco	4	1	0	0	0	1	hotel				4	1	1	0	0	0	0
EN	full	2003	Morgan, J., et al. (2003). "A large outbreak of histoplasmosis among American travelers associated with a hotel in Acapulco, Mexico, spring 2001."Am J Trop Med Hyg69(6): 663-669.	262(148)	1	21	USA		TOURISM	0	1	0	0	student	NORTH AMERICA	yes	0	1	0	yes	USA	MEXICO	0	1	0	0	0	0	0	0	MEXICO	acapulco	4	1	0	0	0	1	hotel				4	1	1	0	0	0	0
EN	full	2003	Morgan, J., et al. (2003). "A large outbreak of histoplasmosis among American travelers associated with a hotel in Acapulco, Mexico, spring 2001."Am J Trop Med Hyg69(6): 663-669.	262(148)	1	21	USA		TOURISM	0	1	0	0	student	NORTH AMERICA	yes	0	1	0	yes	USA	MEXICO	0	1	0	0	0	0	0	0	MEXICO	acapulco	4	1	0	0	0	1	hotel				4	1	1	0	0	0	0
EN	full	2003	Morgan, J., et al. (2003). "A large outbreak of histoplasmosis among American travelers associated with a hotel in Acapulco, Mexico, spring 2001."Am J Trop Med Hyg69(6): 663-669.	262(148)	1	21	USA		TOURISM	0	1	0	0	student	NORTH AMERICA	yes	0	1	0	yes	USA	MEXICO	0	1	0	0	0	0	0	0	MEXICO	acapulco	4	1	0	0	0	1	hotel				4	1	1	0	0	0	0
EN	full	2003	Morgan, J., et al. (2003). "A large outbreak of histoplasmosis among American travelers associated with a hotel in Acapulco, Mexico, spring 2001."Am J Trop Med Hyg69(6): 663-669.	262(148)	1	21	USA		TOURISM	0	1	0	0	student	NORTH AMERICA	yes	0	1	0	yes	USA	MEXICO	0	1	0	0	0	0	0	0	MEXICO	acapulco	4	1	0	0	0	1	hotel				4	1	1	0	0	0	0
EN	full	2003	Morgan, J., et al. (2003). "A large outbreak of histoplasmosis among American travelers associated with a hotel in Acapulco, Mexico, spring 2001."Am J Trop Med Hyg69(6): 663-669.	262(148)	1	21	USA		TOURISM	0	1	0	0	student	NORTH AMERICA	yes	0	1	0	yes	USA	MEXICO	0	1	0	0	0	0	0	0	MEXICO	acapulco	4	1	0	0	0	1	hotel				4	1	1	0	0	0	0
EN	full	2003	Morgan, J., et al. (2003). "A large outbreak of histoplasmosis among American travelers associated with a hotel in Acapulco, Mexico, spring 2001."Am J Trop Med Hyg69(6): 663-669.	262(148)	1	21	USA		TOURISM	0	1	0	0	student	NORTH AMERICA	yes	0	1	0	yes	USA	MEXICO	0	1	0	0	0	0	0	0	MEXICO	acapulco	4	1	0	0	0	1	hotel				4	1	1	0	0	0	0
EN	full	2003	Morgan, J., et al. (2003). "A large outbreak of histoplasmosis among American travelers associated with a hotel in Acapulco, Mexico, spring 2001."Am J Trop Med Hyg69(6): 663-669.	262(148)	1	21	USA		TOURISM	0	1	0	0	student	NORTH AMERICA	yes	0	1	0	yes	USA	MEXICO	0	1	0	0	0	0	0	0	MEXICO	acapulco	4	1	0	0	0	1	hotel				4	1	1	0	0	0	0
EN	full	2003	Morgan, J., et al. (2003). "A large outbreak of histoplasmosis among American travelers associated with a hotel in Acapulco, Mexico, spring 2001."Am J Trop Med Hyg69(6): 663-669.	262(148)	1	21	USA		TOURISM	0	1	0	0	student	NORTH AMERICA	yes	0	1	0	yes	USA	MEXICO	0	1	0	0	0	0	0	0	MEXICO	acapulco	4	1	0	0	0	1	hotel				4	1	1	0	0	0	0
EN	full	2003	Morgan, J., et al. (2003). "A large outbreak of histoplasmosis among American travelers associated with a hotel in Acapulco, Mexico, spring 2001."Am J Trop Med Hyg69(6): 663-669.	262(148)	1	21	USA		TOURISM	0	1	0	0	student	NORTH AMERICA	yes	0	1	0	yes	USA	MEXICO	0	1	0	0	0	0	0	0	MEXICO	acapulco	4	1	0	0	0	1	hotel				4	1	1	0	0	0	0
EN	full	2003	Morgan, J., et al. (2003). "A large outbreak of histoplasmosis among American travelers associated with a hotel in Acapulco, Mexico, spring 2001."Am J Trop Med Hyg69(6): 663-669.	262(148)	1	21	USA		TOURISM	0	1	0	0	student	NORTH AMERICA	yes	0	1	0	yes	USA	MEXICO	0	1	0	0	0	0	0	0	MEXICO	acapulco	4	1	0	0	0	1	hotel				4	1	1	0	0	0	0
EN	full	2003	Morgan, J., et al. (2003). "A large outbreak of histoplasmosis among American travelers associated with a hotel in Acapulco, Mexico, spring 2001."Am J Trop Med Hyg69(6): 663-669.	262(148)	1	21	USA		TOURISM	0	1	0	0	student	NORTH AMERICA	yes	0	1	0	yes	USA	MEXICO	0	1	0	0	0	0	0	0	MEXICO	acapulco	4	1	0	0	0	1	hotel				4	1	1	0	0	0	0
EN	full	2003	Morgan, J., et al. (2003). "A large outbreak of histoplasmosis among American travelers associated with a hotel in Acapulco, Mexico, spring 2001."Am J Trop Med Hyg69(6): 663-669.	262(148)	1	21	USA		TOURISM	0	1	0	0	student	NORTH AMERICA	yes	0	1	0	yes	USA	MEXICO	0	1	0	0	0	0	0	0	MEXICO	acapulco	4	1	0	0	0	1	hotel				4	1	1	0	0	0	0
EN	full	2003	Morgan, J., et al. (2003). "A large outbreak of histoplasmosis among American travelers associated with a hotel in Acapulco, Mexico, spring 2001."Am J Trop Med Hyg69(6): 663-669.	262(148)	1	21	USA		TOURISM	0	1	0	0	student	NORTH AMERICA	yes	0	1	0	yes	USA	MEXICO	0	1	0	0	0	0	0	0	MEXICO	acapulco	4	1	0	0	0	1	hotel				4	1	1	0	0	0	0
EN	full	2003	Morgan, J., et al. (2003). "A large outbreak of histoplasmosis among American travelers associated with a hotel in Acapulco, Mexico, spring 2001."Am J Trop Med Hyg69(6): 663-669.	262(148)	1	21	USA		TOURISM	0	1	0	0	student	NORTH AMERICA	yes	0	1	0	yes	USA	MEXICO	0	1	0	0	0	0	0	0	MEXICO	acapulco	4	1	0	0	0	1	hotel				4	1	1	0	0	0	0
EN	full	2003	Morgan, J., et al. (2003). "A large outbreak of histoplasmosis among American travelers associated with a hotel in Acapulco, Mexico, spring 2001."Am J Trop Med Hyg69(6): 663-669.	262(148)	1	21	USA		TOURISM	0	1	0	0	student	NORTH AMERICA	yes	0	1	0	yes	USA	MEXICO	0	1	0	0	0	0	0	0	MEXICO	acapulco	4	1	0	0	0	1	hotel				4	1	1	0	0	0	0
EN	full	2003	Morgan, J., et al. (2003). "A large outbreak of histoplasmosis among American travelers associated with a hotel in Acapulco, Mexico, spring 2001."Am J Trop Med Hyg69(6): 663-669.	262(148)	1	21	USA		TOURISM	0	1	0	0	student	NORTH AMERICA	yes	0	1	0	yes	USA	MEXICO	0	1	0	0	0	0	0	0	MEXICO	acapulco	4	1	0	0	0	1	hotel				4	1	1	0	0	0	0
EN	full	2003	Morgan, J., et al. (2003). "A large outbreak of histoplasmosis among American travelers associated with a hotel in Acapulco, Mexico, spring 2001."Am J Trop Med Hyg69(6): 663-669.	262(148)	1	21	USA		TOURISM	0	1	0	0	student	NORTH AMERICA	yes	0	1	0	yes	USA	MEXICO	0	1	0	0	0	0	0	0	MEXICO	acapulco	4	1	0	0	0	1	hotel				4	1	1	0	0	0	0
EN	full	2003	Morgan, J., et al. (2003). "A large outbreak of histoplasmosis among American travelers associated with a hotel in Acapulco, Mexico, spring 2001."Am J Trop Med Hyg69(6): 663-669.	262(148)	1	21	USA		TOURISM	0	1	0	0	student	NORTH AMERICA	yes	0	1	0	yes	USA	MEXICO	0	1	0	0	0	0	0	0	MEXICO	acapulco	4	1	0	0	0	1	hotel				4	1	1	0	0	0	0
EN	full	2003	Morgan, J., et al. (2003). "A large outbreak of histoplasmosis among American travelers associated with a hotel in Acapulco, Mexico, spring 2001."Am J Trop Med Hyg69(6): 663-669.	262(148)	1	21	USA		TOURISM	0	1	0	0	student	NORTH AMERICA	yes	0	1	0	yes	USA	MEXICO	0	1	0	0	0	0	0	0	MEXICO	acapulco	4	1	0	0	0	1	hotel				4	1	1	0	0	0	0
EN	full	2003	Morgan, J., et al. (2003). "A large outbreak of histoplasmosis among American travelers associated with a hotel in Acapulco, Mexico, spring 2001."Am J Trop Med Hyg69(6): 663-669.	262(148)	1	21	USA		TOURISM	0	1	0	0	student	NORTH AMERICA	yes	0	1	0	yes	USA	MEXICO	0	1	0	0	0	0	0	0	MEXICO	acapulco	4	1	0	0	0	1	hotel				4	1	1	0	0	0	0
EN	full	2003	Morgan, J., et al. (2003). "A large outbreak of histoplasmosis among American travelers associated with a hotel in Acapulco, Mexico, spring 2001."Am J Trop Med Hyg69(6): 663-669.	262(148)	1	21	USA		TOURISM	0	1	0	0	student	NORTH AMERICA	yes	0	1	0	yes	USA	MEXICO	0	1	0	0	0	0	0	0	MEXICO	acapulco	4	1	0	0	0	1	hotel				4	1	1	0	0	0	0
EN	full	2003	Morgan, J., et al. (2003). "A large outbreak of histoplasmosis among American travelers associated with a hotel in Acapulco, Mexico, spring 2001."Am J Trop Med Hyg69(6): 663-669.	262(148)	1	21	USA		TOURISM	0	1	0	0	student	NORTH AMERICA	yes	0	1	0	yes	USA	MEXICO	0	1	0	0	0	0	0	0	MEXICO	acapulco	4	1	0	0	0	1	hotel				4	1	1	0	0	0	0
EN	full	2003	Morgan, J., et al. (2003). "A large outbreak of histoplasmosis among American travelers associated with a hotel in Acapulco, Mexico, spring 2001."Am J Trop Med Hyg69(6): 663-669.	262(148)	1	21	USA		TOURISM	0	1	0	0	student	NORTH AMERICA	yes	0	1	0	yes	USA	MEXICO	0	1	0	0	0	0	0	0	MEXICO	acapulco	4	1	0	0	0	1	hotel				4	1	1	0	0	0	0
EN	full	2003	Morgan, J., et al. (2003). "A large outbreak of histoplasmosis among American travelers associated with a hotel in Acapulco, Mexico, spring 2001."Am J Trop Med Hyg69(6): 663-669.	262(148)	1	21	USA		TOURISM	0	1	0	0	student	NORTH AMERICA	yes	0	1	0	yes	USA	MEXICO	0	1	0	0	0	0	0	0	MEXICO	acapulco	4	1	0	0	0	1	hotel				4	1	1	0	0	0	0
EN	full	2003	Morgan, J., et al. (2003). "A large outbreak of histoplasmosis among American travelers associated with a hotel in Acapulco, Mexico, spring 2001."Am J Trop Med Hyg69(6): 663-669.	262(148)	1	21	USA		TOURISM	0	1	0	0	student	NORTH AMERICA	yes	0	1	0	yes	USA	MEXICO	0	1	0	0	0	0	0	0	MEXICO	acapulco	4	1	0	0	0	1	hotel				4	1	1	0	0	0	0
EN	full	2003	Morgan, J., et al. (2003). "A large outbreak of histoplasmosis among American travelers associated with a hotel in Acapulco, Mexico, spring 2001."Am J Trop Med Hyg69(6): 663-669.	262(148)	1	21	USA		TOURISM	0	1	0	0	student	NORTH AMERICA	yes	0	1	0	yes	USA	MEXICO	0	1	0	0	0	0	0	0	MEXICO	acapulco	4	1	0	0	0	1	hotel				4	1	1	0	0	0	0
EN	full	2003	Morgan, J., et al. (2003). "A large outbreak of histoplasmosis among American travelers associated with a hotel in Acapulco, Mexico, spring 2001."Am J Trop Med Hyg69(6): 663-669.	262(148)	1	21	USA		TOURISM	0	1	0	0	student	NORTH AMERICA	yes	0	1	0	yes	USA	MEXICO	0	1	0	0	0	0	0	0	MEXICO	acapulco	4	1	0	0	0	1	hotel				4	1	1	0	0	0	0
EN	full	2003	Morgan, J., et al. (2003). "A large outbreak of histoplasmosis among American travelers associated with a hotel in Acapulco, Mexico, spring 2001."Am J Trop Med Hyg69(6): 663-669.	262(148)	1	21	USA		TOURISM	0	1	0	0	student	NORTH AMERICA	yes	0	1	0	yes	USA	MEXICO	0	1	0	0	0	0	0	0	MEXICO	acapulco	4	1	0	0	0	1	hotel				4	1	1	0	0	0	0
EN	full	2003	Morgan, J., et al. (2003). "A large outbreak of histoplasmosis among American travelers associated with a hotel in Acapulco, Mexico, spring 2001."Am J Trop Med Hyg69(6): 663-669.	262(148)	1	21	USA		TOURISM	0	1	0	0	student	NORTH AMERICA	yes	0	1	0	yes	USA	MEXICO	0	1	0	0	0	0	0	0	MEXICO	acapulco	4	1	0	0	0	1	hotel				4	1	1	0	0	0	0
EN	full	2003	Morgan, J., et al. (2003). "A large outbreak of histoplasmosis among American travelers associated with a hotel in Acapulco, Mexico, spring 2001."Am J Trop Med Hyg69(6): 663-669.	262(148)	0	21	USA		TOURISM	0	1	0	0	student	NORTH AMERICA	yes	0	1	0	yes	USA	MEXICO	0	1	0	0	0	0	0	0	MEXICO	acapulco	4	1	0	0	0	1	hotel				4	1	1	0	0	0	0
EN	full	2003	Morgan, J., et al. (2003). "A large outbreak of histoplasmosis among American travelers associated with a hotel in Acapulco, Mexico, spring 2001."Am J Trop Med Hyg69(6): 663-669.	262(148)	0	21	USA		TOURISM	0	1	0	0	student	NORTH AMERICA	yes	0	1	0	yes	USA	MEXICO	0	1	0	0	0	0	0	0	MEXICO	acapulco	4	1	0	0	0	1	hotel				4	1	1	0	0	0	0
EN	full	2003	Morgan, J., et al. (2003). "A large outbreak of histoplasmosis among American travelers associated with a hotel in Acapulco, Mexico, spring 2001."Am J Trop Med Hyg69(6): 663-669.	262(148)	0	21	USA		TOURISM	0	1	0	0	student	NORTH AMERICA	yes	0	1	0	yes	USA	MEXICO	0	1	0	0	0	0	0	0	MEXICO	acapulco	4	1	0	0	0	1	hotel				4	1	1	0	0	0	0
EN	full	2003	Morgan, J., et al. (2003). "A large outbreak of histoplasmosis among American travelers associated with a hotel in Acapulco, Mexico, spring 2001."Am J Trop Med Hyg69(6): 663-669.	262(148)	0	21	USA		TOURISM	0	1	0	0	student	NORTH AMERICA	yes	0	1	0	yes	USA	MEXICO	0	1	0	0	0	0	0	0	MEXICO	acapulco	4	1	0	0	0	1	hotel				4	1	1	0	0	0	0
EN	full	2003	Morgan, J., et al. (2003). "A large outbreak of histoplasmosis among American travelers associated with a hotel in Acapulco, Mexico, spring 2001."Am J Trop Med Hyg69(6): 663-669.	262(148)	0	21	USA		TOURISM	0	1	0	0	student	NORTH AMERICA	yes	0	1	0	yes	USA	MEXICO	0	1	0	0	0	0	0	0	MEXICO	acapulco	4	1	0	0	0	1	hotel				4	1	1	0	0	0	0
EN	full	2003	Morgan, J., et al. (2003). "A large outbreak of histoplasmosis among American travelers associated with a hotel in Acapulco, Mexico, spring 2001."Am J Trop Med Hyg69(6): 663-669.	262(148)	0	21	USA		TOURISM	0	1	0	0	student	NORTH AMERICA	yes	0	1	0	yes	USA	MEXICO	0	1	0	0	0	0	0	0	MEXICO	acapulco	4	1	0	0	0	1	hotel				4	1	1	0	0	0	0
EN	full	2003	Morgan, J., et al. (2003). "A large outbreak of histoplasmosis among American travelers associated with a hotel in Acapulco, Mexico, spring 2001."Am J Trop Med Hyg69(6): 663-669.	262(148)	0	21	USA		TOURISM	0	1	0	0	student	NORTH AMERICA	yes	0	1	0	yes	USA	MEXICO	0	1	0	0	0	0	0	0	MEXICO	acapulco	4	1	0	0	0	1	hotel				4	1	1	0	0	0	0
EN	full	2003	Morgan, J., et al. (2003). "A large outbreak of histoplasmosis among American travelers associated with a hotel in Acapulco, Mexico, spring 2001."Am J Trop Med Hyg69(6): 663-669.	262(148)	0	21	USA		TOURISM	0	1	0	0	student	NORTH AMERICA	yes	0	1	0	yes	USA	MEXICO	0	1	0	0	0	0	0	0	MEXICO	acapulco	4	1	0	0	0	1	hotel				4	1	1	0	0	0	0
EN	full	2003	Morgan, J., et al. (2003). "A large outbreak of histoplasmosis among American travelers associated with a hotel in Acapulco, Mexico, spring 2001."Am J Trop Med Hyg69(6): 663-669.	262(148)	0	21	USA		TOURISM	0	1	0	0	student	NORTH AMERICA	yes	0	1	0	yes	USA	MEXICO	0	1	0	0	0	0	0	0	MEXICO	acapulco	4	1	0	0	0	1	hotel				4	1	1	0	1	1	0
EN	full	2003	Morgan, J., et al. (2003). "A large outbreak of histoplasmosis among American travelers associated with a hotel in Acapulco, Mexico, spring 2001."Am J Trop Med Hyg69(6): 663-669.	262(148)	0	21	USA		TOURISM	0	1	0	0	student	NORTH AMERICA	yes	0	1	0	yes	USA	MEXICO	0	1	0	0	0	0	0	0	MEXICO	acapulco	4	1	0	0	0	1	hotel				4	1	1	0	1	1	0
EN	full	2003	Morgan, J., et al. (2003). "A large outbreak of histoplasmosis among American travelers associated with a hotel in Acapulco, Mexico, spring 2001."Am J Trop Med Hyg69(6): 663-669.	262(148)	0	21	USA		TOURISM	0	1	0	0	student	NORTH AMERICA	yes	0	1	0	yes	USA	MEXICO	0	1	0	0	0	0	0	0	MEXICO	acapulco	4	1	0	0	0	1	hotel				4	1	1	0	1	1	0
EN	full	2003	Morgan, J., et al. (2003). "A large outbreak of histoplasmosis among American travelers associated with a hotel in Acapulco, Mexico, spring 2001."Am J Trop Med Hyg69(6): 663-669.	262(148)	0	21	USA		TOURISM	0	1	0	0	student	NORTH AMERICA	yes	0	1	0	yes	USA	MEXICO	0	1	0	0	0	0	0	0	MEXICO	acapulco	4	1	0	0	0	1	hotel				4	1	1	0	1	1	0
EN	full	2003	Morgan, J., et al. (2003). "A large outbreak of histoplasmosis among American travelers associated with a hotel in Acapulco, Mexico, spring 2001."Am J Trop Med Hyg69(6): 663-669.	262(148)	0	21	USA		TOURISM	0	1	0	0	student	NORTH AMERICA	yes	0	1	0	yes	USA	MEXICO	0	1	0	0	0	0	0	0	MEXICO	acapulco	4	1	0	0	0	1	hotel				4	1	1	0	1	1	0
EN	full	2003	Morgan, J., et al. (2003). "A large outbreak of histoplasmosis among American travelers associated with a hotel in Acapulco, Mexico, spring 2001."Am J Trop Med Hyg69(6): 663-669.	262(148)	0	21	USA		TOURISM	0	1	0	0	student	NORTH AMERICA	yes	0	1	0	yes	USA	MEXICO	0	1	0	0	0	0	0	0	MEXICO	acapulco	4	1	0	0	0	1	hotel				4	1	1	0	1	1	0
EN	full	2003	Morgan, J., et al. (2003). "A large outbreak of histoplasmosis among American travelers associated with a hotel in Acapulco, Mexico, spring 2001."Am J Trop Med Hyg69(6): 663-669.	262(148)	0	21	USA		TOURISM	0	1	0	0	student	NORTH AMERICA	yes	0	1	0	yes	USA	MEXICO	0	1	0	0	0	0	0	0	MEXICO	acapulco	4	1	0	0	0	1	hotel				4	1	1	0	1	1	0
EN	full	2003	Morgan, J., et al. (2003). "A large outbreak of histoplasmosis among American travelers associated with a hotel in Acapulco, Mexico, spring 2001."Am J Trop Med Hyg69(6): 663-669.	262(148)	0	21	USA		TOURISM	0	1	0	0	student	NORTH AMERICA	yes	0	1	0	yes	USA	MEXICO	0	1	0	0	0	0	0	0	MEXICO	acapulco	4	1	0	0	0	1	hotel				4	1	1	0	1	1	0
EN	full	2003	Morgan, J., et al. (2003). "A large outbreak of histoplasmosis among American travelers associated with a hotel in Acapulco, Mexico, spring 2001."Am J Trop Med Hyg69(6): 663-669.	262(148)	0	21	USA		TOURISM	0	1	0	0	student	NORTH AMERICA	yes	0	1	0	yes	USA	MEXICO	0	1	0	0	0	0	0	0	MEXICO	acapulco	4	1	0	0	0	1	hotel				4	1	1	0	1	1	0
EN	full	2003	Morgan, J., et al. (2003). "A large outbreak of histoplasmosis among American travelers associated with a hotel in Acapulco, Mexico, spring 2001."Am J Trop Med Hyg69(6): 663-669.	262(148)	0	21	USA		TOURISM	0	1	0	0	student	NORTH AMERICA	yes	0	1	0	yes	USA	MEXICO	0	1	0	0	0	0	0	0	MEXICO	acapulco	4	1	0	0	0	1	hotel				4	1	1	0	1	1	0
EN	full	2003	Morgan, J., et al. (2003). "A large outbreak of histoplasmosis among American travelers associated with a hotel in Acapulco, Mexico, spring 2001."Am J Trop Med Hyg69(6): 663-669.	262(148)	0	21	USA		TOURISM	0	1	0	0	student	NORTH AMERICA	yes	0	1	0	yes	USA	MEXICO	0	1	0	0	0	0	0	0	MEXICO	acapulco	4	1	0	0	0	1	hotel				4	1	1	0	1	1	0
EN	full	2003	Morgan, J., et al. (2003). "A large outbreak of histoplasmosis among American travelers associated with a hotel in Acapulco, Mexico, spring 2001."Am J Trop Med Hyg69(6): 663-669.	262(148)	0	21	USA		TOURISM	0	1	0	0	student	NORTH AMERICA	yes	0	1	0	yes	USA	MEXICO	0	1	0	0	0	0	0	0	MEXICO	acapulco	4	1	0	0	0	1	hotel				4	1	1	0	1	1	0
EN	full	2003	Morgan, J., et al. (2003). "A large outbreak of histoplasmosis among American travelers associated with a hotel in Acapulco, Mexico, spring 2001."Am J Trop Med Hyg69(6): 663-669.	262(148)	0	21	USA		TOURISM	0	1	0	0	student	NORTH AMERICA	yes	0	1	0	yes	USA	MEXICO	0	1	0	0	0	0	0	0	MEXICO	acapulco	4	1	0	0	0	1	hotel				4	1	1	0	1	1	0
EN	full	2003	Morgan, J., et al. (2003). "A large outbreak of histoplasmosis among American travelers associated with a hotel in Acapulco, Mexico, spring 2001."Am J Trop Med Hyg69(6): 663-669.	262(148)	0	21	USA		TOURISM	0	1	0	0	student	NORTH AMERICA	yes	0	1	0	yes	USA	MEXICO	0	1	0	0	0	0	0	0	MEXICO	acapulco	4	1	0	0	0	1	hotel				4	1	1	0	1	1	0
EN	full	2003	Morgan, J., et al. (2003). "A large outbreak of histoplasmosis among American travelers associated with a hotel in Acapulco, Mexico, spring 2001."Am J Trop Med Hyg69(6): 663-669.	262(148)	0	21	USA		TOURISM	0	1	0	0	student	NORTH AMERICA	yes	0	1	0	yes	USA	MEXICO	0	1	0	0	0	0	0	0	MEXICO	acapulco	4	1	0	0	0	1	hotel				4	1	1	0	1	1	0
EN	full	2003	Morgan, J., et al. (2003). "A large outbreak of histoplasmosis among American travelers associated with a hotel in Acapulco, Mexico, spring 2001."Am J Trop Med Hyg69(6): 663-669.	262(148)	0	21	USA		TOURISM	0	1	0	0	student	NORTH AMERICA	yes	0	1	0	yes	USA	MEXICO	0	1	0	0	0	0	0	0	MEXICO	acapulco	4	1	0	0	0	1	hotel				4	1	1	0	1	1	0
EN	full	2003	Morgan, J., et al. (2003). "A large outbreak of histoplasmosis among American travelers associated with a hotel in Acapulco, Mexico, spring 2001."Am J Trop Med Hyg69(6): 663-669.	262(148)	0	21	USA		TOURISM	0	1	0	0	student	NORTH AMERICA	yes	0	1	0	yes	USA	MEXICO	0	1	0	0	0	0	0	0	MEXICO	acapulco	4	1	0	0	0	1	hotel				4	1	1	0	1	1	0
EN	full	2003	Morgan, J., et al. (2003). "A large outbreak of histoplasmosis among American travelers associated with a hotel in Acapulco, Mexico, spring 2001."Am J Trop Med Hyg69(6): 663-669.	262(148)	0	21	USA		TOURISM	0	1	0	0	student	NORTH AMERICA	yes	0	1	0	yes	USA	MEXICO	0	1	0	0	0	0	0	0	MEXICO	acapulco	4	1	0	0	0	1	hotel				4	1	1	0	1	1	0
EN	full	2003	Morgan, J., et al. (2003). "A large outbreak of histoplasmosis among American travelers associated with a hotel in Acapulco, Mexico, spring 2001."Am J Trop Med Hyg69(6): 663-669.	262(148)	0	21	USA		TOURISM	0	1	0	0	student	NORTH AMERICA	yes	0	1	0	yes	USA	MEXICO	0	1	0	0	0	0	0	0	MEXICO	acapulco	4	1	0	0	0	1	hotel				4	1	1	0	1	1	0
EN	full	2003	Morgan, J., et al. (2003). "A large outbreak of histoplasmosis among American travelers associated with a hotel in Acapulco, Mexico, spring 2001."Am J Trop Med Hyg69(6): 663-669.	262(148)	0	21	USA		TOURISM	0	1	0	0	student	NORTH AMERICA	yes	0	1	0	yes	USA	MEXICO	0	1	0	0	0	0	0	0	MEXICO	acapulco	4	1	0	0	0	1	hotel				4	1	1	0	1	1	0
EN	full	2003	Morgan, J., et al. (2003). "A large outbreak of histoplasmosis among American travelers associated with a hotel in Acapulco, Mexico, spring 2001."Am J Trop Med Hyg69(6): 663-669.	262(148)	0	21	USA		TOURISM	0	1	0	0	student	NORTH AMERICA	yes	0	1	0	yes	USA	MEXICO	0	1	0	0	0	0	0	0	MEXICO	acapulco	4	1	0	0	0	1	hotel				4	1	1	0	1	1	0
EN	full	2003	Morgan, J., et al. (2003). "A large outbreak of histoplasmosis among American travelers associated with a hotel in Acapulco, Mexico, spring 2001."Am J Trop Med Hyg69(6): 663-669.	262(148)	0	21	USA		TOURISM	0	1	0	0	student	NORTH AMERICA	yes	0	1	0	yes	USA	MEXICO	0	1	0	0	0	0	0	0	MEXICO	acapulco	4	1	0	0	0	1	hotel				4	1	1	0	1	1	0
EN	full	2003	Morgan, J., et al. (2003). "A large outbreak of histoplasmosis among American travelers associated with a hotel in Acapulco, Mexico, spring 2001."Am J Trop Med Hyg69(6): 663-669.	262(148)	0	21	USA		TOURISM	0	1	0	0	student	NORTH AMERICA	yes	0	1	0	yes	USA	MEXICO	0	1	0	0	0	0	0	0	MEXICO	acapulco	4	1	0	0	0	1	hotel				4	1	1	0	1	1	0
EN	full	2003	Morgan, J., et al. (2003). "A large outbreak of histoplasmosis among American travelers associated with a hotel in Acapulco, Mexico, spring 2001."Am J Trop Med Hyg69(6): 663-669.	262(148)	0	21	USA		TOURISM	0	1	0	0	student	NORTH AMERICA	yes	0	1	0	yes	USA	MEXICO	0	1	0	0	0	0	0	0	MEXICO	acapulco	4	1	0	0	0	1	hotel				4	1	1	0	1	1	0
EN	full	2003	Morgan, J., et al. (2003). "A large outbreak of histoplasmosis among American travelers associated with a hotel in Acapulco, Mexico, spring 2001."Am J Trop Med Hyg69(6): 663-669.	262(148)	0	21	USA		TOURISM	0	1	0	0	student	NORTH AMERICA	yes	0	1	0	yes	USA	MEXICO	0	1	0	0	0	0	0	0	MEXICO	acapulco	4	1	0	0	0	1	hotel				4	1	1	0	1	1	0
EN	full	2003	Morgan, J., et al. (2003). "A large outbreak of histoplasmosis among American travelers associated with a hotel in Acapulco, Mexico, spring 2001."Am J Trop Med Hyg69(6): 663-669.	262(148)	0	21	USA		TOURISM	0	1	0	0	student	NORTH AMERICA	yes	0	1	0	yes	USA	MEXICO	0	1	0	0	0	0	0	0	MEXICO	acapulco	4	1	0	0	0	1	hotel				4	1	1	0	1	1	0
EN	full	2003	Morgan, J., et al. (2003). "A large outbreak of histoplasmosis among American travelers associated with a hotel in Acapulco, Mexico, spring 2001."Am J Trop Med Hyg69(6): 663-669.	262(148)	0	21	USA		TOURISM	0	1	0	0	student	NORTH AMERICA	yes	0	1	0	yes	USA	MEXICO	0	1	0	0	0	0	0	0	MEXICO	acapulco	4	1	0	0	0	1	hotel				4	1	1	0	1	1	1
EN	full	2003	Morgan, J., et al. (2003). "A large outbreak of histoplasmosis among American travelers associated with a hotel in Acapulco, Mexico, spring 2001."Am J Trop Med Hyg69(6): 663-669.	262(148)	0	21	USA		TOURISM	0	1	0	0	student	NORTH AMERICA	yes	0	1	0	yes	USA	MEXICO	0	1	0	0	0	0	0	0	MEXICO	acapulco	4	1	0	0	0	1	hotel				4	1	1	0	1	1	1
EN	full	2003	Morgan, J., et al. (2003). "A large outbreak of histoplasmosis among American travelers associated with a hotel in Acapulco, Mexico, spring 2001."Am J Trop Med Hyg69(6): 663-669.	262(148)	0	21	USA		TOURISM	0	1	0	0	student	NORTH AMERICA	yes	0	1	0	yes	USA	MEXICO	0	1	0	0	0	0	0	0	MEXICO	acapulco	4	1	0	0	0	1	hotel				4	1	1	0	1	1	1
EN	full	2003	Morgan, J., et al. (2003). "A large outbreak of histoplasmosis among American travelers associated with a hotel in Acapulco, Mexico, spring 2001."Am J Trop Med Hyg69(6): 663-669.	262(148)	0	21	USA		TOURISM	0	1	0	0	student	NORTH AMERICA	yes	0	1	0	yes	USA	MEXICO	0	1	0	0	0	0	0	0	MEXICO	acapulco	4	1	0	0	0	1	hotel				4	1	1	0	1	1	1
EN	full	2003	Morgan, J., et al. (2003). "A large outbreak of histoplasmosis among American travelers associated with a hotel in Acapulco, Mexico, spring 2001."Am J Trop Med Hyg69(6): 663-669.	262(148)	0	21	USA		TOURISM	0	1	0	0	student	NORTH AMERICA	yes	0	1	0	yes	USA	MEXICO	0	1	0	0	0	0	0	0	MEXICO	acapulco	4	1	0	0	0	1	hotel				4	1	1	0	1	1	1
EN	full	2003	Morgan, J., et al. (2003). "A large outbreak of histoplasmosis among American travelers associated with a hotel in Acapulco, Mexico, spring 2001."Am J Trop Med Hyg69(6): 663-669.	262(148)	0	21	USA		TOURISM	0	1	0	0	student	NORTH AMERICA	yes	0	1	0	yes	USA	MEXICO	0	1	0	0	0	0	0	0	MEXICO	acapulco	4	1	0	0	0	1	hotel				4	1	1	0	1	1	1
EN	full	2003	Morgan, J., et al. (2003). "A large outbreak of histoplasmosis among American travelers associated with a hotel in Acapulco, Mexico, spring 2001."Am J Trop Med Hyg69(6): 663-669.	262(148)	0	21	USA		TOURISM	0	1	0	0	student	NORTH AMERICA	yes	0	1	0	yes	USA	MEXICO	0	1	0	0	0	0	0	0	MEXICO	acapulco	4	1	0	0	0	1	hotel				4	1	1	0	1	1	1
EN	full	2003	Morgan, J., et al. (2003). "A large outbreak of histoplasmosis among American travelers associated with a hotel in Acapulco, Mexico, spring 2001."Am J Trop Med Hyg69(6): 663-669.	262(148)	0	21	USA		TOURISM	0	1	0	0	student	NORTH AMERICA	yes	0	1	0	yes	USA	MEXICO	0	1	0	0	0	0	0	0	MEXICO	acapulco	4	1	0	0	0	1	hotel				4	1	1	0	1	1	1
EN	full	2003	Morgan, J., et al. (2003). "A large outbreak of histoplasmosis among American travelers associated with a hotel in Acapulco, Mexico, spring 2001."Am J Trop Med Hyg69(6): 663-669.	262(148)	0	21	USA		TOURISM	0	1	0	0	student	NORTH AMERICA	yes	0	1	0	yes	USA	MEXICO	0	1	0	0	0	0	0	0	MEXICO	acapulco	4	1	0	0	0	1	hotel				4	1	1	0	1	1	1
EN	full	2003	Morgan, J., et al. (2003). "A large outbreak of histoplasmosis among American travelers associated with a hotel in Acapulco, Mexico, spring 2001."Am J Trop Med Hyg69(6): 663-669.	262(148)	0	21	USA		TOURISM	0	1	0	0	student	NORTH AMERICA	yes	0	1	0	yes	USA	MEXICO	0	1	0	0	0	0	0	0	MEXICO	acapulco	4	1	0	0	0	1	hotel				4	1	1	0	1	1	1
EN	full	2003	Morgan, J., et al. (2003). "A large outbreak of histoplasmosis among American travelers associated with a hotel in Acapulco, Mexico, spring 2001."Am J Trop Med Hyg69(6): 663-669.	262(148)	0	21	USA		TOURISM	0	1	0	0	student	NORTH AMERICA	yes	0	1	0	yes	USA	MEXICO	0	1	0	0	0	0	0	0	MEXICO	acapulco	4	1	0	0	0	1	hotel				4	1	1	0	1	1	1
EN	full	2003	Morgan, J., et al. (2003). "A large outbreak of histoplasmosis among American travelers associated with a hotel in Acapulco, Mexico, spring 2001."Am J Trop Med Hyg69(6): 663-669.	262(148)	0	21	USA		TOURISM	0	1	0	0	student	NORTH AMERICA	yes	0	1	0	yes	USA	MEXICO	0	1	0	0	0	0	0	0	MEXICO	acapulco	4	1	0	0	0	1	hotel				4	1	1	0	1	1	1
EN	full	2003	Morgan, J., et al. (2003). "A large outbreak of histoplasmosis among American travelers associated with a hotel in Acapulco, Mexico, spring 2001."Am J Trop Med Hyg69(6): 663-669.	262(148)	0	21	USA		TOURISM	0	1	0	0	student	NORTH AMERICA	yes	0	1	0	yes	USA	MEXICO	0	1	0	0	0	0	0	0	MEXICO	acapulco	4	1	0	0	0	1	hotel				4	1	1	0	1	1	1
EN	full	2003	Morgan, J., et al. (2003). "A large outbreak of histoplasmosis among American travelers associated with a hotel in Acapulco, Mexico, spring 2001."Am J Trop Med Hyg69(6): 663-669.	262(148)	0	21	USA		TOURISM	0	1	0	0	student	NORTH AMERICA	yes	0	1	0	yes	USA	MEXICO	0	1	0	0	0	0	0	0	MEXICO	acapulco	4	1	0	0	0	1	hotel				4	1	1	0	1	0	1
EN	full	2003	Morgan, J., et al. (2003). "A large outbreak of histoplasmosis among American travelers associated with a hotel in Acapulco, Mexico, spring 2001."Am J Trop Med Hyg69(6): 663-669.	262(148)	0	21	USA		TOURISM	0	1	0	0	student	NORTH AMERICA	yes	0	1	0	yes	USA	MEXICO	0	1	0	0	0	0	0	0	MEXICO	acapulco	4	1	0	0	0	1	hotel				4	1	1	0	1	0	1
EN	full	2003	Morgan, J., et al. (2003). "A large outbreak of histoplasmosis among American travelers associated with a hotel in Acapulco, Mexico, spring 2001."Am J Trop Med Hyg69(6): 663-669.	262(148)	0	21	USA		TOURISM	0	1	0	0	student	NORTH AMERICA	yes	0	1	0	yes	USA	MEXICO	0	1	0	0	0	0	0	0	MEXICO	acapulco	4	1	0	0	0	1	hotel				4	1	1	0	1	0	1
EN	full	2003	Morgan, J., et al. (2003). "A large outbreak of histoplasmosis among American travelers associated with a hotel in Acapulco, Mexico, spring 2001."Am J Trop Med Hyg69(6): 663-669.	262(148)	0	21	USA		TOURISM	0	1	0	0	student	NORTH AMERICA	yes	0	1	0	yes	USA	MEXICO	0	1	0	0	0	0	0	0	MEXICO	acapulco	4	1	0	0	0	1	hotel				4	1	1	0	1	0	1
EN	full	2003	Morgan, J., et al. (2003). "A large outbreak of histoplasmosis among American travelers associated with a hotel in Acapulco, Mexico, spring 2001."Am J Trop Med Hyg69(6): 663-669.	262(148)	0	21	USA		TOURISM	0	1	0	0	student	NORTH AMERICA	yes	0	1	0	yes	USA	MEXICO	0	1	0	0	0	0	0	0	MEXICO	acapulco	4	1	0	0	0	1	hotel				4	1	1	0	1	0	1
EN	full	2003	Morgan, J., et al. (2003). "A large outbreak of histoplasmosis among American travelers associated with a hotel in Acapulco, Mexico, spring 2001."Am J Trop Med Hyg69(6): 663-669.	262(148)	0	21	USA		TOURISM	0	1	0	0	student	NORTH AMERICA	yes	0	1	0	yes	USA	MEXICO	0	1	0	0	0	0	0	0	MEXICO	acapulco	4	1	0	0	0	1	hotel				4	1	1	0	1	0	1
EN	full	2003	Morgan, J., et al. (2003). "A large outbreak of histoplasmosis among American travelers associated with a hotel in Acapulco, Mexico, spring 2001."Am J Trop Med Hyg69(6): 663-669.	262(148)	0	21	USA		TOURISM	0	1	0	0	student	NORTH AMERICA	yes	0	1	0	yes	USA	MEXICO	0	1	0	0	0	0	0	0	MEXICO	acapulco	4	1	0	0	0	1	hotel				4	1	1	0	1	0	1
EN	full	2003	Morgan, J., et al. (2003). "A large outbreak of histoplasmosis among American travelers associated with a hotel in Acapulco, Mexico, spring 2001."Am J Trop Med Hyg69(6): 663-669.	262(148)	0	21	USA		TOURISM	0	1	0	0	student	NORTH AMERICA	yes	0	1	0	yes	USA	MEXICO	0	1	0	0	0	0	0	0	MEXICO	acapulco	4	1	0	0	0	1	hotel				4	1	1	0	1	0	1
EN	full	2003	Morgan, J., et al. (2003). "A large outbreak of histoplasmosis among American travelers associated with a hotel in Acapulco, Mexico, spring 2001."Am J Trop Med Hyg69(6): 663-669.	262(148)	0	21	USA		TOURISM	0	1	0	0	student	NORTH AMERICA	yes	0	1	0	yes	USA	MEXICO	0	1	0	0	0	0	0	0	MEXICO	acapulco	4	1	0	0	0	1	hotel				4	1	1	0	1	0	1
EN	full	2003	Morgan, J., et al. (2003). "A large outbreak of histoplasmosis among American travelers associated with a hotel in Acapulco, Mexico, spring 2001."Am J Trop Med Hyg69(6): 663-669.	262(148)	0	21	USA		TOURISM	0	1	0	0	student	NORTH AMERICA	yes	0	1	0	yes	USA	MEXICO	0	1	0	0	0	0	0	0	MEXICO	acapulco	4	1	0	0	0	1	hotel				4	1	1	0	1	0	1
EN	full	2003	Morgan, J., et al. (2003). "A large outbreak of histoplasmosis among American travelers associated with a hotel in Acapulco, Mexico, spring 2001."Am J Trop Med Hyg69(6): 663-669.	262(148)	0	21	USA		TOURISM	0	1	0	0	student	NORTH AMERICA	yes	0	1	0	yes	USA	MEXICO	0	1	0	0	0	0	0	0	MEXICO	acapulco	4	1	0	0	0	1	hotel				4	1	1	0	1	0	1
EN	full	2003	Morgan, J., et al. (2003). "A large outbreak of histoplasmosis among American travelers associated with a hotel in Acapulco, Mexico, spring 2001."Am J Trop Med Hyg69(6): 663-669.	262(148)	0	21	USA		TOURISM	0	1	0	0	student	NORTH AMERICA	yes	0	1	0	yes	USA	MEXICO	0	1	0	0	0	0	0	0	MEXICO	acapulco	4	1	0	0	0	1	hotel				4	1	1	0	1	0	1
EN	full	2003	Morgan, J., et al. (2003). "A large outbreak of histoplasmosis among American travelers associated with a hotel in Acapulco, Mexico, spring 2001."Am J Trop Med Hyg69(6): 663-669.	262(148)	0	21	USA		TOURISM	0	1	0	0	student	NORTH AMERICA	yes	0	1	0	yes	USA	MEXICO	0	1	0	0	0	0	0	0	MEXICO	acapulco	4	1	0	0	0	1	hotel				4	1	1	0	1	0	1
EN	full	2003	Morgan, J., et al. (2003). "A large outbreak of histoplasmosis among American travelers associated with a hotel in Acapulco, Mexico, spring 2001."Am J Trop Med Hyg69(6): 663-669.	262(148)	0	21	USA		TOURISM	0	1	0	0	student	NORTH AMERICA	yes	0	1	0	yes	USA	MEXICO	0	1	0	0	0	0	0	0	MEXICO	acapulco	4	1	0	0	0	1	hotel				4	1	1	0	1	0	1
EN	full	2003	Morgan, J., et al. (2003). "A large outbreak of histoplasmosis among American travelers associated with a hotel in Acapulco, Mexico, spring 2001."Am J Trop Med Hyg69(6): 663-669.	262(148)	0	21	USA		TOURISM	0	1	0	0	student	NORTH AMERICA	yes	0	1	0	yes	USA	MEXICO	0	1	0	0	0	0	0	0	MEXICO	acapulco	4	1	0	0	0	1	hotel				4	1	1	0	1	0	1
EN	full	2003	Morgan, J., et al. (2003). "A large outbreak of histoplasmosis among American travelers associated with a hotel in Acapulco, Mexico, spring 2001."Am J Trop Med Hyg69(6): 663-669.	262(148)	0	21	USA		TOURISM	0	1	0	0	student	NORTH AMERICA	yes	0	1	0	yes	USA	MEXICO	0	1	0	0	0	0	0	0	MEXICO	acapulco	4	1	0	0	0	1	hotel				4	1	1	0	1	0	1
EN	full	2003	Morgan, J., et al. (2003). "A large outbreak of histoplasmosis among American travelers associated with a hotel in Acapulco, Mexico, spring 2001."Am J Trop Med Hyg69(6): 663-669.	262(148)	0	21	USA		TOURISM	0	1	0	0	student	NORTH AMERICA	yes	0	1	0	yes	USA	MEXICO	0	1	0	0	0	0	0	0	MEXICO	acapulco	4	1	0	0	0	1	hotel				4	1	1	0	1	0	1
EN	full	2003	Morgan, J., et al. (2003). "A large outbreak of histoplasmosis among American travelers associated with a hotel in Acapulco, Mexico, spring 2001."Am J Trop Med Hyg69(6): 663-669.	262(148)	0	21	USA		TOURISM	0	1	0	0	student	NORTH AMERICA	yes	0	1	0	yes	USA	MEXICO	0	1	0	0	0	0	0	0	MEXICO	acapulco	4	1	0	0	0	1	hotel				4	1	1	0	1	0	1
EN	full	2003	Morgan, J., et al. (2003). "A large outbreak of histoplasmosis among American travelers associated with a hotel in Acapulco, Mexico, spring 2001."Am J Trop Med Hyg69(6): 663-669.	262(148)	0	21	USA		TOURISM	0	1	0	0	student	NORTH AMERICA	yes	0	1	0	yes	USA	MEXICO	0	1	0	0	0	0	0	0	MEXICO	acapulco	4	1	0	0	0	1	hotel				4	1	1	0	1	0	1
EN	full	2003	Morgan, J., et al. (2003). "A large outbreak of histoplasmosis among American travelers associated with a hotel in Acapulco, Mexico, spring 2001."Am J Trop Med Hyg69(6): 663-669.	262(148)	0	21	USA		TOURISM	0	1	0	0	student	NORTH AMERICA	yes	0	1	0	yes	USA	MEXICO	0	1	0	0	0	0	0	0	MEXICO	acapulco	4	1	0	0	0	1	hotel				4	1	1	0	1	0	1
EN	full	2003	Morgan, J., et al. (2003). "A large outbreak of histoplasmosis among American travelers associated with a hotel in Acapulco, Mexico, spring 2001."Am J Trop Med Hyg69(6): 663-669.	262(148)	0	21	USA		TOURISM	0	1	0	0	student	NORTH AMERICA	yes	0	1	0	yes	USA	MEXICO	0	1	0	0	0	0	0	0	MEXICO	acapulco	4	1	0	0	0	1	hotel				4	1	1	0	0	0	0
EN	full	2003	Morgan, J., et al. (2003). "A large outbreak of histoplasmosis among American travelers associated with a hotel in Acapulco, Mexico, spring 2001."Am J Trop Med Hyg69(6): 663-669.	262(148)	0	21	USA		TOURISM	0	1	0	0	student	NORTH AMERICA	yes	0	1	0	yes	USA	MEXICO	0	1	0	0	0	0	0	0	MEXICO	acapulco	4	1	0	0	0	1	hotel				4	1	1	0	0	0	0
EN	full	2003	Morgan, J., et al. (2003). "A large outbreak of histoplasmosis among American travelers associated with a hotel in Acapulco, Mexico, spring 2001."Am J Trop Med Hyg69(6): 663-669.	262(148)	0	21	USA		TOURISM	0	1	0	0	student	NORTH AMERICA	yes	0	1	0	yes	USA	MEXICO	0	1	0	0	0	0	0	0	MEXICO	acapulco	4	1	0	0	0	1	hotel				4	1	1	0	0	0	0
EN	full	2003	Morgan, J., et al. (2003). "A large outbreak of histoplasmosis among American travelers associated with a hotel in Acapulco, Mexico, spring 2001."Am J Trop Med Hyg69(6): 663-669.	262(148)	0	21	USA		TOURISM	0	1	0	0	student	NORTH AMERICA	yes	0	1	0	yes	USA	MEXICO	0	1	0	0	0	0	0	0	MEXICO	acapulco	4	1	0	0	0	1	hotel				4	1	1	0	0	0	0
EN	full	2003	Morgan, J., et al. (2003). "A large outbreak of histoplasmosis among American travelers associated with a hotel in Acapulco, Mexico, spring 2001."Am J Trop Med Hyg69(6): 663-669.	262(148)	0	21	USA		TOURISM	0	1	0	0	student	NORTH AMERICA	yes	0	1	0	yes	USA	MEXICO	0	1	0	0	0	0	0	0	MEXICO	acapulco	4	1	0	0	0	1	hotel				4	1	1	0	0	0	0
EN	full	2003	Morgan, J., et al. (2003). "A large outbreak of histoplasmosis among American travelers associated with a hotel in Acapulco, Mexico, spring 2001."Am J Trop Med Hyg69(6): 663-669.	262(148)	0	21	USA		TOURISM	0	1	0	0	student	NORTH AMERICA	yes	0	1	0	yes	USA	MEXICO	0	1	0	0	0	0	0	0	MEXICO	acapulco	4	1	0	0	0	1	hotel				4	1	1	0	0	0	0
EN	full	2003	Morgan, J., et al. (2003). "A large outbreak of histoplasmosis among American travelers associated with a hotel in Acapulco, Mexico, spring 2001."Am J Trop Med Hyg69(6): 663-669.	262(148)	0	21	USA		TOURISM	0	1	0	0	student	NORTH AMERICA	yes	0	1	0	yes	USA	MEXICO	0	1	0	0	0	0	0	0	MEXICO	acapulco	4	1	0	0	0	1	hotel				4	1	1	0	0	0	0
EN	full	2003	Morgan, J., et al. (2003). "A large outbreak of histoplasmosis among American travelers associated with a hotel in Acapulco, Mexico, spring 2001."Am J Trop Med Hyg69(6): 663-669.	262(148)	0	21	USA		TOURISM	0	1	0	0	student	NORTH AMERICA	yes	0	1	0	yes	USA	MEXICO	0	1	0	0	0	0	0	0	MEXICO	acapulco	4	1	0	0	0	1	hotel				4	1	1	0	0	0	0
EN	full	2003	Morgan, J., et al. (2003). "A large outbreak of histoplasmosis among American travelers associated with a hotel in Acapulco, Mexico, spring 2001."Am J Trop Med Hyg69(6): 663-669.	262(148)	0	21	USA		TOURISM	0	1	0	0	student	NORTH AMERICA	yes	0	1	0	yes	USA	MEXICO	0	1	0	0	0	0	0	0	MEXICO	acapulco	4	1	0	0	0	1	hotel				4	1	1	0	0	0	0
EN	full	2003	Morgan, J., et al. (2003). "A large outbreak of histoplasmosis among American travelers associated with a hotel in Acapulco, Mexico, spring 2001."Am J Trop Med Hyg69(6): 663-669.	262(148)	0	21	USA		TOURISM	0	1	0	0	student	NORTH AMERICA	yes	0	1	0	yes	USA	MEXICO	0	1	0	0	0	0	0	0	MEXICO	acapulco	4	1	0	0	0	1	hotel				4	1	1	0	0	0	0
EN	full	2003	Morgan, J., et al. (2003). "A large outbreak of histoplasmosis among American travelers associated with a hotel in Acapulco, Mexico, spring 2001."Am J Trop Med Hyg69(6): 663-669.	262(148)	0	21	USA		TOURISM	0	1	0	0	student	NORTH AMERICA	yes	0	1	0	yes	USA	MEXICO	0	1	0	0	0	0	0	0	MEXICO	acapulco	4	1	0	0	0	1	hotel				4	1	1	0	0	0	0
EN	full	2003	Morgan, J., et al. (2003). "A large outbreak of histoplasmosis among American travelers associated with a hotel in Acapulco, Mexico, spring 2001."Am J Trop Med Hyg69(6): 663-669.	262(148)	0	21	USA		TOURISM	0	1	0	0	student	NORTH AMERICA	yes	0	1	0	yes	USA	MEXICO	0	1	0	0	0	0	0	0	MEXICO	acapulco	4	1	0	0	0	1	hotel				4	1	1	0	0	0	0
EN	full	2003	Morgan, J., et al. (2003). "A large outbreak of histoplasmosis among American travelers associated with a hotel in Acapulco, Mexico, spring 2001."Am J Trop Med Hyg69(6): 663-669.	262(148)	0	21	USA		TOURISM	0	1	0	0	student	NORTH AMERICA	yes	0	1	0	yes	USA	MEXICO	0	1	0	0	0	0	0	0	MEXICO	acapulco	4	1	0	0	0	1	hotel				4	1	1	0	0	0	0
EN	full	2003	Morgan, J., et al. (2003). "A large outbreak of histoplasmosis among American travelers associated with a hotel in Acapulco, Mexico, spring 2001."Am J Trop Med Hyg69(6): 663-669.	262(148)	0	21	USA		TOURISM	0	1	0	0	student	NORTH AMERICA	yes	0	1	0	yes	USA	MEXICO	0	1	0	0	0	0	0	0	MEXICO	acapulco	4	1	0	0	0	1	hotel				4	1	1	0	0	0	0
EN	full	2003	Morgan, J., et al. (2003). "A large outbreak of histoplasmosis among American travelers associated with a hotel in Acapulco, Mexico, spring 2001."Am J Trop Med Hyg69(6): 663-669.	262(148)	0	21	USA		TOURISM	0	1	0	0	student	NORTH AMERICA	yes	0	1	0	yes	USA	MEXICO	0	1	0	0	0	0	0	0	MEXICO	acapulco	4	1	0	0	0	1	hotel				4	1	1	0	0	0	0
EN	full	2003	Morgan, J., et al. (2003). "A large outbreak of histoplasmosis among American travelers associated with a hotel in Acapulco, Mexico, spring 2001."Am J Trop Med Hyg69(6): 663-669.	262(148)	0	21	USA		TOURISM	0	1	0	0	student	NORTH AMERICA	yes	0	1	0	yes	USA	MEXICO	0	1	0	0	0	0	0	0	MEXICO	acapulco	4	1	0	0	0	1	hotel				4	1	1	0	0	0	0
EN	full	2003	Morgan, J., et al. (2003). "A large outbreak of histoplasmosis among American travelers associated with a hotel in Acapulco, Mexico, spring 2001."Am J Trop Med Hyg69(6): 663-669.	262(148)	0	21	USA		TOURISM	0	1	0	0	student	NORTH AMERICA	yes	0	1	0	yes	USA	MEXICO	0	1	0	0	0	0	0	0	MEXICO	acapulco	4	1	0	0	0	1	hotel				4	1	1	0	0	0	0
EN	full	2003	Morgan, J., et al. (2003). "A large outbreak of histoplasmosis among American travelers associated with a hotel in Acapulco, Mexico, spring 2001."Am J Trop Med Hyg69(6): 663-669.	262(148)	0	21	USA		TOURISM	0	1	0	0	student	NORTH AMERICA	yes	0	1	0	yes	USA	MEXICO	0	1	0	0	0	0	0	0	MEXICO	acapulco	4	1	0	0	0	1	hotel				4	1	1	0	0	0	0
EN	full	2003	Morgan, J., et al. (2003). "A large outbreak of histoplasmosis among American travelers associated with a hotel in Acapulco, Mexico, spring 2001."Am J Trop Med Hyg69(6): 663-669.	262(148)	0	21	USA		TOURISM	0	1	0	0	student	NORTH AMERICA	yes	0	1	0	yes	USA	MEXICO	0	1	0	0	0	0	0	0	MEXICO	acapulco	4	1	0	0	0	1	hotel				4	1	1	0	0	0	0
EN	full	2003	Morgan, J., et al. (2003). "A large outbreak of histoplasmosis among American travelers associated with a hotel in Acapulco, Mexico, spring 2001."Am J Trop Med Hyg69(6): 663-669.	262(148)	0	21	USA		TOURISM	0	1	0	0	student	NORTH AMERICA	yes	0	1	0	yes	USA	MEXICO	0	1	0	0	0	0	0	0	MEXICO	acapulco	4	1	0	0	0	1	hotel				4	1	1	0	0	0	0
EN	full	2003	Morgan, J., et al. (2003). "A large outbreak of histoplasmosis among American travelers associated with a hotel in Acapulco, Mexico, spring 2001."Am J Trop Med Hyg69(6): 663-669.	262(148)	0	21	USA		TOURISM	0	1	0	0	student	NORTH AMERICA	yes	0	1	0	yes	USA	MEXICO	0	1	0	0	0	0	0	0	MEXICO	acapulco	4	1	0	0	0	1	hotel				4	1	1	0	0	0	0
EN	full	2003	Morgan, J., et al. (2003). "A large outbreak of histoplasmosis among American travelers associated with a hotel in Acapulco, Mexico, spring 2001."Am J Trop Med Hyg69(6): 663-669.	262(148)	0	21	USA		TOURISM	0	1	0	0	student	NORTH AMERICA	yes	0	1	0	yes	USA	MEXICO	0	1	0	0	0	0	0	0	MEXICO	acapulco	4	1	0	0	0	1	hotel				4	1	1	0	0	0	0
EN	full	2003	Morgan, J., et al. (2003). "A large outbreak of histoplasmosis among American travelers associated with a hotel in Acapulco, Mexico, spring 2001."Am J Trop Med Hyg69(6): 663-669.	262(148)	0	21	USA		TOURISM	0	1	0	0	student	NORTH AMERICA	yes	0	1	0	yes	USA	MEXICO	0	1	0	0	0	0	0	0	MEXICO	acapulco	4	1	0	0	0	1	hotel				4	1	1	0	0	0	0
EN	full	2003	Morgan, J., et al. (2003). "A large outbreak of histoplasmosis among American travelers associated with a hotel in Acapulco, Mexico, spring 2001."Am J Trop Med Hyg69(6): 663-669.	262(148)	0	21	USA		TOURISM	0	1	0	0	student	NORTH AMERICA	yes	0	1	0	yes	USA	MEXICO	0	1	0	0	0	0	0	0	MEXICO	acapulco	4	1	0	0	0	1	hotel				4	1	1	0	0	0	0
EN	full	2003	Morgan, J., et al. (2003). "A large outbreak of histoplasmosis among American travelers associated with a hotel in Acapulco, Mexico, spring 2001."Am J Trop Med Hyg69(6): 663-669.	262(148)	0	21	USA		TOURISM	0	1	0	0	student	NORTH AMERICA	yes	0	1	0	yes	USA	MEXICO	0	1	0	0	0	0	0	0	MEXICO	acapulco	4	1	0	0	0	1	hotel				4	1	1	0	0	0	0
EN	full	2003	Morgan, J., et al. (2003). "A large outbreak of histoplasmosis among American travelers associated with a hotel in Acapulco, Mexico, spring 2001."Am J Trop Med Hyg69(6): 663-669.	262(148)	0	21	USA		TOURISM	0	1	0	0	student	NORTH AMERICA	yes	0	1	0	yes	USA	MEXICO	0	1	0	0	0	0	0	0	MEXICO	acapulco	4	1	0	0	0	1	hotel				4	1	1	0	0	0	0
EN	full	2003	Morgan, J., et al. (2003). "A large outbreak of histoplasmosis among American travelers associated with a hotel in Acapulco, Mexico, spring 2001."Am J Trop Med Hyg69(6): 663-669.	262(148)	0	21	USA		TOURISM	0	1	0	0	student	NORTH AMERICA	yes	0	1	0	yes	USA	MEXICO	0	1	0	0	0	0	0	0	MEXICO	acapulco	4	1	0	0	0	1	hotel				4	1	1	0	0	0	0
EN	full	2003	Morgan, J., et al. (2003). "A large outbreak of histoplasmosis among American travelers associated with a hotel in Acapulco, Mexico, spring 2001."Am J Trop Med Hyg69(6): 663-669.	262(148)	0	21	USA		TOURISM	0	1	0	0	student	NORTH AMERICA	yes	0	1	0	yes	USA	MEXICO	0	1	0	0	0	0	0	0	MEXICO	acapulco	4	1	0	0	0	1	hotel				4	1	1	0	0	0	0
EN	full	2003	Morgan, J., et al. (2003). "A large outbreak of histoplasmosis among American travelers associated with a hotel in Acapulco, Mexico, spring 2001."Am J Trop Med Hyg69(6): 663-669.	262(148)	0	21	USA		TOURISM	0	1	0	0	student	NORTH AMERICA	yes	0	1	0	yes	USA	MEXICO	0	1	0	0	0	0	0	0	MEXICO	acapulco	4	1	0	0	0	1	hotel				4	1	1	0	0	0	0
EN	full	2003	Morgan, J., et al. (2003). "A large outbreak of histoplasmosis among American travelers associated with a hotel in Acapulco, Mexico, spring 2001."Am J Trop Med Hyg69(6): 663-669.	262(148)	0	21	USA		TOURISM	0	1	0	0	student	NORTH AMERICA	yes	0	1	0	yes	USA	MEXICO	0	1	0	0	0	0	0	0	MEXICO	acapulco	4	1	0	0	0	1	hotel				4	1	1	0	0	0	0
EN	full	2003	Morgan, J., et al. (2003). "A large outbreak of histoplasmosis among American travelers associated with a hotel in Acapulco, Mexico, spring 2001."Am J Trop Med Hyg69(6): 663-669.	262(148)	0	21	USA		TOURISM	0	1	0	0	student	NORTH AMERICA	yes	0	1	0	yes	USA	MEXICO	0	1	0	0	0	0	0	0	MEXICO	acapulco	4	1	0	0	0	1	hotel				4	1	1	0	0	0	0
EN	full	2003	Morgan, J., et al. (2003). "A large outbreak of histoplasmosis among American travelers associated with a hotel in Acapulco, Mexico, spring 2001."Am J Trop Med Hyg69(6): 663-669.	262(148)	0	21	USA		TOURISM	0	1	0	0	student	NORTH AMERICA	yes	0	1	0	yes	USA	MEXICO	0	1	0	0	0	0	0	0	MEXICO	acapulco	4	1	0	0	0	1	hotel				4	1	1	0	0	0	0
EN	full	2003	Morgan, J., et al. (2003). "A large outbreak of histoplasmosis among American travelers associated with a hotel in Acapulco, Mexico, spring 2001."Am J Trop Med Hyg69(6): 663-669.	262(148)	0	21	USA		TOURISM	0	1	0	0	student	NORTH AMERICA	yes	0	1	0	yes	USA	MEXICO	0	1	0	0	0	0	0	0	MEXICO	acapulco	4	1	0	0	0	1	hotel				4	1	1	0	0	0	0
EN	full	2003	Morgan, J., et al. (2003). "A large outbreak of histoplasmosis among American travelers associated with a hotel in Acapulco, Mexico, spring 2001."Am J Trop Med Hyg69(6): 663-669.	262(148)	0	21	USA		TOURISM	0	1	0	0	student	NORTH AMERICA	yes	0	1	0	yes	USA	MEXICO	0	1	0	0	0	0	0	0	MEXICO	acapulco	4	1	0	0	0	1	hotel				4	1	1	0	0	0	0
EN	full	2003	Morgan, J., et al. (2003). "A large outbreak of histoplasmosis among American travelers associated with a hotel in Acapulco, Mexico, spring 2001."Am J Trop Med Hyg69(6): 663-669.	262(148)	0	21	USA		TOURISM	0	1	0	0	student	NORTH AMERICA	yes	0	1	0	yes	USA	MEXICO	0	1	0	0	0	0	0	0	MEXICO	acapulco	4	1	0	0	0	1	hotel				4	1	1	0	0	0	0
EN	full	2003	Morgan, J., et al. (2003). "A large outbreak of histoplasmosis among American travelers associated with a hotel in Acapulco, Mexico, spring 2001."Am J Trop Med Hyg69(6): 663-669.	262(148)	0	21	USA		TOURISM	0	1	0	0	student	NORTH AMERICA	yes	0	1	0	yes	USA	MEXICO	0	1	0	0	0	0	0	0	MEXICO	acapulco	4	1	0	0	0	1	hotel				4	1	1	0	0	0	0
EN	full	2003	Morgan, J., et al. (2003). "A large outbreak of histoplasmosis among American travelers associated with a hotel in Acapulco, Mexico, spring 2001."Am J Trop Med Hyg69(6): 663-669.	262(148)	0	21	USA		TOURISM	0	1	0	0	student	NORTH AMERICA	yes	0	1	0	yes	USA	MEXICO	0	1	0	0	0	0	0	0	MEXICO	acapulco	4	1	0	0	0	1	hotel				4	1	1	0	0	0	0
EN	full	2003	Morgan, J., et al. (2003). "A large outbreak of histoplasmosis among American travelers associated with a hotel in Acapulco, Mexico, spring 2001."Am J Trop Med Hyg69(6): 663-669.	262(148)	0	21	USA		TOURISM	0	1	0	0	student	NORTH AMERICA	yes	0	1	0	yes	USA	MEXICO	0	1	0	0	0	0	0	0	MEXICO	acapulco	4	1	0	0	0	1	hotel				4	1	1	0	0	0	0
EN	full	2003	Morgan, J., et al. (2003). "A large outbreak of histoplasmosis among American travelers associated with a hotel in Acapulco, Mexico, spring 2001."Am J Trop Med Hyg69(6): 663-669.	262(148)	0	21	USA		TOURISM	0	1	0	0	student	NORTH AMERICA	yes	0	1	0	yes	USA	MEXICO	0	1	0	0	0	0	0	0	MEXICO	acapulco	4	1	0	0	0	1	hotel				4	1	1	0	0	0	0
EN	full	2003	Morgan, J., et al. (2003). "A large outbreak of histoplasmosis among American travelers associated with a hotel in Acapulco, Mexico, spring 2001."Am J Trop Med Hyg69(6): 663-669.	262(148)	0	21	USA		TOURISM	0	1	0	0	student	NORTH AMERICA	yes	0	1	0	yes	USA	MEXICO	0	1	0	0	0	0	0	0	MEXICO	acapulco	4	1	0	0	0	1	hotel				4	1	1	0	0	0	0
EN	full	2003	Morgan, J., et al. (2003). "A large outbreak of histoplasmosis among American travelers associated with a hotel in Acapulco, Mexico, spring 2001."Am J Trop Med Hyg69(6): 663-669.	262(148)	0	21	USA		TOURISM	0	1	0	0	student	NORTH AMERICA	yes	0	1	0	yes	USA	MEXICO	0	1	0	0	0	0	0	0	MEXICO	acapulco	4	1	0	0	0	1	hotel				4	1	1	0	0	0	0
EN	full	2003	Morgan, J., et al. (2003). "A large outbreak of histoplasmosis among American travelers associated with a hotel in Acapulco, Mexico, spring 2001."Am J Trop Med Hyg69(6): 663-669.	262(148)	0	21	USA		TOURISM	0	1	0	0	student	NORTH AMERICA	yes	0	1	0	yes	USA	MEXICO	0	1	0	0	0	0	0	0	MEXICO	acapulco	4	1	0	0	0	1	hotel				4	1	1	0	0	0	0
EN	full	2003	Morgan, J., et al. (2003). "A large outbreak of histoplasmosis among American travelers associated with a hotel in Acapulco, Mexico, spring 2001."Am J Trop Med Hyg69(6): 663-669.	262(148)	0	21	USA		TOURISM	0	1	0	0	student	NORTH AMERICA	yes	0	1	0	yes	USA	MEXICO	0	1	0	0	0	0	0	0	MEXICO	acapulco	4	1	0	0	0	1	hotel				4	1	1	0	0	0	0
EN	full	2003	Morgan, J., et al. (2003). "A large outbreak of histoplasmosis among American travelers associated with a hotel in Acapulco, Mexico, spring 2001."Am J Trop Med Hyg69(6): 663-669.	262(148)	0	21	USA		TOURISM	0	1	0	0	student	NORTH AMERICA	yes	0	1	0	yes	USA	MEXICO	0	1	0	0	0	0	0	0	MEXICO	acapulco	4	1	0	0	0	1	hotel				4	1	1	0	0	0	0
EN	full	2003	Morgan, J., et al. (2003). "A large outbreak of histoplasmosis among American travelers associated with a hotel in Acapulco, Mexico, spring 2001."Am J Trop Med Hyg69(6): 663-669.	262(148)	0	21	USA		TOURISM	0	1	0	0	student	NORTH AMERICA	yes	0	1	0	yes	USA	MEXICO	0	1	0	0	0	0	0	0	MEXICO	acapulco	4	1	0	0	0	1	hotel				4	1	1	0	0	0	0
EN	full	2003	Morgan, J., et al. (2003). "A large outbreak of histoplasmosis among American travelers associated with a hotel in Acapulco, Mexico, spring 2001."Am J Trop Med Hyg69(6): 663-669.	262(148)	0	21	USA		TOURISM	0	1	0	0	student	NORTH AMERICA	yes	0	1	0	yes	USA	MEXICO	0	1	0	0	0	0	0	0	MEXICO	acapulco	4	1	0	0	0	1	hotel				4	1	1	0	0	0	0
EN	full	2003	Morgan, J., et al. (2003). "A large outbreak of histoplasmosis among American travelers associated with a hotel in Acapulco, Mexico, spring 2001."Am J Trop Med Hyg69(6): 663-669.	262(148)	0	21	USA		TOURISM	0	1	0	0	student	NORTH AMERICA	yes	0	1	0	yes	USA	MEXICO	0	1	0	0	0	0	0	0	MEXICO	acapulco	4	1	0	0	0	1	hotel				4	1	1	0	0	0	0
EN	full	2003	Morgan, J., et al. (2003). "A large outbreak of histoplasmosis among American travelers associated with a hotel in Acapulco, Mexico, spring 2001."Am J Trop Med Hyg69(6): 663-669.	262(148)	0	21	USA		TOURISM	0	1	0	0	student	NORTH AMERICA	yes	0	1	0	yes	USA	MEXICO	0	1	0	0	0	0	0	0	MEXICO	acapulco	4	1	0	0	0	1	hotel				4	1	1	0	0	0	0
EN	full	2003	Morgan, J., et al. (2003). "A large outbreak of histoplasmosis among American travelers associated with a hotel in Acapulco, Mexico, spring 2001."Am J Trop Med Hyg69(6): 663-669.	262(148)	0	21	USA		TOURISM	0	1	0	0	student	NORTH AMERICA	yes	0	1	0	yes	USA	MEXICO	0	1	0	0	0	0	0	0	MEXICO	acapulco	4	1	0	0	0	1	hotel				4	1	1	0	0	0	0
EN	full	2003	Morgan, J., et al. (2003). "A large outbreak of histoplasmosis among American travelers associated with a hotel in Acapulco, Mexico, spring 2001."Am J Trop Med Hyg69(6): 663-669.	262(148)	0	21	USA		TOURISM	0	1	0	0	student	NORTH AMERICA	yes	0	1	0	yes	USA	MEXICO	0	1	0	0	0	0	0	0	MEXICO	acapulco	4	1	0	0	0	1	hotel				4	1	1	0	0	0	0
EN	full	2003	Morgan, J., et al. (2003). "A large outbreak of histoplasmosis among American travelers associated with a hotel in Acapulco, Mexico, spring 2001."Am J Trop Med Hyg69(6): 663-669.	262(148)	0	21	USA		TOURISM	0	1	0	0	student	NORTH AMERICA	yes	0	1	0	yes	USA	MEXICO	0	1	0	0	0	0	0	0	MEXICO	acapulco	4	1	0	0	0	1	hotel				4	1	1	0	0	0	0
EN	full	2003	Morgan, J., et al. (2003). "A large outbreak of histoplasmosis among American travelers associated with a hotel in Acapulco, Mexico, spring 2001."Am J Trop Med Hyg69(6): 663-669.	262(148)	0	21	USA		TOURISM	0	1	0	0	student	NORTH AMERICA	yes	0	1	0	yes	USA	MEXICO	0	1	0	0	0	0	0	0	MEXICO	acapulco	4	1	0	0	0	1	hotel				4	1	1	0	0	0	0
EN	full	2003	Morgan, J., et al. (2003). "A large outbreak of histoplasmosis among American travelers associated with a hotel in Acapulco, Mexico, spring 2001."Am J Trop Med Hyg69(6): 663-669.	262(148)	0	21	USA		TOURISM	0	1	0	0	student	NORTH AMERICA	yes	0	1	0	yes	USA	MEXICO	0	1	0	0	0	0	0	0	MEXICO	acapulco	4	1	0	0	0	1	hotel				4	1	1	0	0	0	0
EN	full	2003	Morgan, J., et al. (2003). "A large outbreak of histoplasmosis among American travelers associated with a hotel in Acapulco, Mexico, spring 2001."Am J Trop Med Hyg69(6): 663-669.	262(148)	0	21	USA		TOURISM	0	1	0	0	student	NORTH AMERICA	yes	0	1	0	yes	USA	MEXICO	0	1	0	0	0	0	0	0	MEXICO	acapulco	4	1	0	0	0	1	hotel				4	1	1	0	0	0	0
EN	full	2003	Morgan, J., et al. (2003). "A large outbreak of histoplasmosis among American travelers associated with a hotel in Acapulco, Mexico, spring 2001."Am J Trop Med Hyg69(6): 663-669.	262(148)	0	21	USA		TOURISM	0	1	0	0	student	NORTH AMERICA	yes	0	1	0	yes	USA	MEXICO	0	1	0	0	0	0	0	0	MEXICO	acapulco	4	1	0	0	0	1	hotel				4	1	1	0	0	0	0
EN	full	2003	Morgan, J., et al. (2003). "A large outbreak of histoplasmosis among American travelers associated with a hotel in Acapulco, Mexico, spring 2001."Am J Trop Med Hyg69(6): 663-669.	262(148)	0	21	USA		TOURISM	0	1	0	0	student	NORTH AMERICA	yes	0	1	0	yes	USA	MEXICO	0	1	0	0	0	0	0	0	MEXICO	acapulco	4	1	0	0	0	1	hotel				4	1	1	0	0	0	0
EN	full	2003	Morgan, J., et al. (2003). "A large outbreak of histoplasmosis among American travelers associated with a hotel in Acapulco, Mexico, spring 2001."Am J Trop Med Hyg69(6): 663-669.	262(148)	0	21	USA		TOURISM	0	1	0	0	student	NORTH AMERICA	yes	0	1	0	yes	USA	MEXICO	0	1	0	0	0	0	0	0	MEXICO	acapulco	4	1	0	0	0	1	hotel				4	1	1	0	0	0	0
EN	full	2003	Morgan, J., et al. (2003). "A large outbreak of histoplasmosis among American travelers associated with a hotel in Acapulco, Mexico, spring 2001."Am J Trop Med Hyg69(6): 663-669.	262(148)	0	21	USA		TOURISM	0	1	0	0	student	NORTH AMERICA	yes	0	1	0	yes	USA	MEXICO	0	1	0	0	0	0	0	0	MEXICO	acapulco	4	1	0	0	0	1	hotel				4	1	1	0	0	0	0
EN	full	2003	Morgan, J., et al. (2003). "A large outbreak of histoplasmosis among American travelers associated with a hotel in Acapulco, Mexico, spring 2001."Am J Trop Med Hyg69(6): 663-669.	262(148)	0	21	USA		TOURISM	0	1	0	0	student	NORTH AMERICA	yes	0	1	0	yes	USA	MEXICO	0	1	0	0	0	0	0	0	MEXICO	acapulco	4	1	0	0	0	1	hotel				4	1	1	0	0	0	0
EN	full	2003	Morgan, J., et al. (2003). "A large outbreak of histoplasmosis among American travelers associated with a hotel in Acapulco, Mexico, spring 2001."Am J Trop Med Hyg69(6): 663-669.	262(148)	0	21	USA		TOURISM	0	1	0	0	student	NORTH AMERICA	yes	0	1	0	yes	USA	MEXICO	0	1	0	0	0	0	0	0	MEXICO	acapulco	4	1	0	0	0	1	hotel				4	1	1	0	0	0	0
EN	full	2003	Morgan, J., et al. (2003). "A large outbreak of histoplasmosis among American travelers associated with a hotel in Acapulco, Mexico, spring 2001."Am J Trop Med Hyg69(6): 663-669.	262(148)	0	21	USA		TOURISM	0	1	0	0	student	NORTH AMERICA	yes	0	1	0	yes	USA	MEXICO	0	1	0	0	0	0	0	0	MEXICO	acapulco	4	1	0	0	0	1	hotel				4	1	1	0	0	0	0
EN	full	2003	Morgan, J., et al. (2003). "A large outbreak of histoplasmosis among American travelers associated with a hotel in Acapulco, Mexico, spring 2001."Am J Trop Med Hyg69(6): 663-669.	262(148)	0	21	USA		TOURISM	0	1	0	0	student	NORTH AMERICA	yes	0	1	0	yes	USA	MEXICO	0	1	0	0	0	0	0	0	MEXICO	acapulco	4	1	0	0	0	1	hotel				4	1	1	0	0	0	0
EN	full	2003	Morgan, J., et al. (2003). "A large outbreak of histoplasmosis among American travelers associated with a hotel in Acapulco, Mexico, spring 2001."Am J Trop Med Hyg69(6): 663-669.	262(148)	0	21	USA		TOURISM	0	1	0	0	student	NORTH AMERICA	yes	0	1	0	yes	USA	MEXICO	0	1	0	0	0	0	0	0	MEXICO	acapulco	4	1	0	0	0	1	hotel				4	1	1	0	0	0	0
EN	full	2003	Morgan, J., et al. (2003). "A large outbreak of histoplasmosis among American travelers associated with a hotel in Acapulco, Mexico, spring 2001."Am J Trop Med Hyg69(6): 663-669.	262(148)	0	21	USA		TOURISM	0	1	0	0	tourism	NORTH AMERICA	yes	0	1	0	yes	USA	MEXICO	0	1	0	0	0	0	0	0	MEXICO	acapulco	4	1	0	0	0	1	hotel				4	1	1	0	0	0	0
EN	full	2003	Morgan, J., et al. (2003). "A large outbreak of histoplasmosis among American travelers associated with a hotel in Acapulco, Mexico, spring 2001."Am J Trop Med Hyg69(6): 663-669.	262(148)	0	21	USA		TOURISM	0	1	0	0	tourism	NORTH AMERICA	yes	0	1	0	yes	USA	MEXICO	0	1	0	0	0	0	0	0	MEXICO	acapulco	4	1	0	0	0	1	hotel				4	1	1	0	0	0	0
EN	full	2003	Morgan, J., et al. (2003). "A large outbreak of histoplasmosis among American travelers associated with a hotel in Acapulco, Mexico, spring 2001."Am J Trop Med Hyg69(6): 663-669.	262(148)	0	21	USA		TOURISM	0	1	0	0	tourism	NORTH AMERICA	yes	0	1	0	yes	USA	MEXICO	0	1	0	0	0	0	0	0	MEXICO	acapulco	4	1	0	0	0	1	hotel				4	1	1	0	0	0	0
EN	full	2003	Morgan, J., et al. (2003). "A large outbreak of histoplasmosis among American travelers associated with a hotel in Acapulco, Mexico, spring 2001."Am J Trop Med Hyg69(6): 663-669.	262(148)	0	21	USA		TOURISM	0	1	0	0	tourism	NORTH AMERICA	yes	0	1	0	yes	USA	MEXICO	0	1	0	0	0	0	0	0	MEXICO	acapulco	4	1	0	0	0	1	hotel				4	1	1	0	0	0	0
EN	full	2003	Morgan, J., et al. (2003). "A large outbreak of histoplasmosis among American travelers associated with a hotel in Acapulco, Mexico, spring 2001."Am J Trop Med Hyg69(6): 663-669.	262(148)	0	21	USA		TOURISM	0	1	0	0	tourism	NORTH AMERICA	yes	0	1	0	yes	USA	MEXICO	0	1	0	0	0	0	0	0	MEXICO	acapulco	4	1	0	0	0	1	hotel				4	1	1	0	0	0	0
EN	full	2003	Morgan, J., et al. (2003). "A large outbreak of histoplasmosis among American travelers associated with a hotel in Acapulco, Mexico, spring 2001."Am J Trop Med Hyg69(6): 663-669.	262(148)	0	21	USA		TOURISM	0	1	0	0	tourism	NORTH AMERICA	yes	0	1	0	yes	USA	MEXICO	0	1	0	0	0	0	0	0	MEXICO	acapulco	4	1	0	0	0	1	hotel				4	1	1	0	0	0	0
EN	full	2003	Morgan, J., et al. (2003). "A large outbreak of histoplasmosis among American travelers associated with a hotel in Acapulco, Mexico, spring 2001."Am J Trop Med Hyg69(6): 663-669.	262(148)	0	21	USA		TOURISM	0	1	0	0	tourism	NORTH AMERICA	yes	0	1	0	yes	USA	MEXICO	0	1	0	0	0	0	0	0	MEXICO	acapulco	4	1	0	0	0	1	hotel				4	1	1	0	0	0	0
EN	full	2003	Morgan, J., et al. (2003). "A large outbreak of histoplasmosis among American travelers associated with a hotel in Acapulco, Mexico, spring 2001."Am J Trop Med Hyg69(6): 663-669.	262(148)	0	21	USA		TOURISM	0	1	0	0	tourism	NORTH AMERICA	yes	0	1	0	yes	USA	MEXICO	0	1	0	0	0	0	0	0	MEXICO	acapulco	4	1	0	0	0	1	hotel				4	1	1	0	0	0	0
EN	full	2003	Morgan, J., et al. (2003). "A large outbreak of histoplasmosis among American travelers associated with a hotel in Acapulco, Mexico, spring 2001."Am J Trop Med Hyg69(6): 663-669.	262(148)	0	21	USA		TOURISM	0	1	0	0	tourism	NORTH AMERICA	yes	0	1	0	yes	USA	MEXICO	0	1	0	0	0	0	0	0	MEXICO	acapulco	4	1	0	0	0	1	hotel				4	1	1	0	0	0	0
EN	full	2003	Morgan, J., et al. (2003). "A large outbreak of histoplasmosis among American travelers associated with a hotel in Acapulco, Mexico, spring 2001."Am J Trop Med Hyg69(6): 663-669.	262(148)	0	21	USA		TOURISM	0	1	0	0	tourism	NORTH AMERICA	yes	0	1	0	yes	USA	MEXICO	0	1	0	0	0	0	0	0	MEXICO	acapulco	4	1	0	0	0	1	hotel				4	1	1	0	0	0	0
EN	full	2003	Morgan, J., et al. (2003). "A large outbreak of histoplasmosis among American travelers associated with a hotel in Acapulco, Mexico, spring 2001."Am J Trop Med Hyg69(6): 663-669.	262(148)	0	21	USA		TOURISM	0	1	0	0	tourism	NORTH AMERICA	yes	0	1	0	yes	USA	MEXICO	0	1	0	0	0	0	0	0	MEXICO	acapulco	4	1	0	0	0	1	hotel				4	1	1	0	0	0	0
EN	full	2003	Morgan, J., et al. (2003). "A large outbreak of histoplasmosis among American travelers associated with a hotel in Acapulco, Mexico, spring 2001."Am J Trop Med Hyg69(6): 663-669.	262(148)	0	21	USA		TOURISM	0	1	0	0	tourism	NORTH AMERICA	yes	0	1	0	yes	USA	MEXICO	0	1	0	0	0	0	0	0	MEXICO	acapulco	4	1	0	0	0	1	hotel				4	1	1	0	0	0	0
EN	full	2003	Morgan, J., et al. (2003). "A large outbreak of histoplasmosis among American travelers associated with a hotel in Acapulco, Mexico, spring 2001."Am J Trop Med Hyg69(6): 663-669.	262(148)	0	21	USA		TOURISM	0	1	0	0	tourism	NORTH AMERICA	yes	0	1	0	yes	USA	MEXICO	0	1	0	0	0	0	0	0	MEXICO	acapulco	4	1	0	0	0	1	hotel				4	1	1	0	0	0	0
EN	full	2003	Morgan, J., et al. (2003). "A large outbreak of histoplasmosis among American travelers associated with a hotel in Acapulco, Mexico, spring 2001."Am J Trop Med Hyg69(6): 663-669.	262(148)	0	21	USA		TOURISM	0	1	0	0	tourism	NORTH AMERICA	yes	0	1	0	yes	USA	MEXICO	0	1	0	0	0	0	0	0	MEXICO	acapulco	4	1	0	0	0	1	hotel				4	1	1	0	0	0	0
EN	full	2003	Morgan, J., et al. (2003). "A large outbreak of histoplasmosis among American travelers associated with a hotel in Acapulco, Mexico, spring 2001."Am J Trop Med Hyg69(6): 663-669.	262(148)	0	21	USA		TOURISM	0	1	0	0	tourism	NORTH AMERICA	yes	0	1	0	yes	USA	MEXICO	0	1	0	0	0	0	0	0	MEXICO	acapulco	4	1	0	0	0	1	hotel				4	1	1	0	0	0	0
EN	full	2003	Morgan, J., et al. (2003). "A large outbreak of histoplasmosis among American travelers associated with a hotel in Acapulco, Mexico, spring 2001."Am J Trop Med Hyg69(6): 663-669.	262(148)	1	21	USA		TOURISM	0	1	0	0	tourism	NORTH AMERICA	yes	0	1	0	yes	USA	MEXICO	0	1	0	0	0	0	0	0	MEXICO	acapulco	4	1	0	0	0	1	hotel				4	1	1	0	0	0	0
EN	full	2003	Morgan, J., et al. (2003). "A large outbreak of histoplasmosis among American travelers associated with a hotel in Acapulco, Mexico, spring 2001."Am J Trop Med Hyg69(6): 663-669.	262(148)	1	21	USA		TOURISM	0	1	0	0	tourism	NORTH AMERICA	yes	0	1	0	yes	USA	MEXICO	0	1	0	0	0	0	0	0	MEXICO	acapulco	4	1	0	0	0	1	hotel				4	1	1	0	0	0	0
EN	full	2003	Morgan, J., et al. (2003). "A large outbreak of histoplasmosis among American travelers associated with a hotel in Acapulco, Mexico, spring 2001."Am J Trop Med Hyg69(6): 663-669.	262(148)	0	21	USA		TOURISM	0	1	0	0	student	NORTH AMERICA	yes	0	1	0	yes	USA	MEXICO	0	1	0	0	0	0	0	0	MEXICO	acapulco	4	1	0	0	0	1	hotel				4	1	1	0	0	0	0
EN	full	2003	Morgan, J., et al. (2003). "A large outbreak of histoplasmosis among American travelers associated with a hotel in Acapulco, Mexico, spring 2001."Am J Trop Med Hyg69(6): 663-669.	262(148)	0	21	USA		TOURISM	0	1	0	0	student	NORTH AMERICA	yes	0	1	0	yes	USA	MEXICO	0	1	0	0	0	0	0	0	MEXICO	acapulco	4	1	0	0	0	1	hotel				4	1	1	0	0	0	0
EN	full	2003	Morgan, J., et al. (2003). "A large outbreak of histoplasmosis among American travelers associated with a hotel in Acapulco, Mexico, spring 2001."Am J Trop Med Hyg69(6): 663-669.	262(148)	0	21	USA		TOURISM	0	1	0	0	student	NORTH AMERICA	yes	0	1	0	yes	USA	MEXICO	0	1	0	0	0	0	0	0	MEXICO	acapulco	4	1	0	0	0	1	hotel				4	1	1	0	0	0	0
EN	full	2003	Morgan, J., et al. (2003). "A large outbreak of histoplasmosis among American travelers associated with a hotel in Acapulco, Mexico, spring 2001."Am J Trop Med Hyg69(6): 663-669.	262(148)	0	21	USA		TOURISM	0	1	0	0	student	NORTH AMERICA	yes	0	1	0	yes	USA	MEXICO	0	1	0	0	0	0	0	0	MEXICO	acapulco	4	1	0	0	0	1	hotel				4	1	1	0	0	0	0
EN	full	2003	Morgan, J., et al. (2003). "A large outbreak of histoplasmosis among American travelers associated with a hotel in Acapulco, Mexico, spring 2001."Am J Trop Med Hyg69(6): 663-669.	262(148)	0	21	USA		TOURISM	0	1	0	0	student	NORTH AMERICA	yes	0	1	0	yes	USA	MEXICO	0	1	0	0	0	0	0	0	MEXICO	acapulco	4	1	0	0	0	1	hotel				4	1	1	0	0	0	0
EN	full	2003	Morgan, J., et al. (2003). "A large outbreak of histoplasmosis among American travelers associated with a hotel in Acapulco, Mexico, spring 2001."Am J Trop Med Hyg69(6): 663-669.	262(148)	0	21	USA		TOURISM	0	1	0	0	student	NORTH AMERICA	yes	0	1	0	yes	USA	MEXICO	0	1	0	0	0	0	0	0	MEXICO	acapulco	4	1	0	0	0	1	hotel				4	1	1	0	0	0	0
EN	full	2003	Morgan, J., et al. (2003). "A large outbreak of histoplasmosis among American travelers associated with a hotel in Acapulco, Mexico, spring 2001."Am J Trop Med Hyg69(6): 663-669.	262(148)	0	21	USA		TOURISM	0	1	0	0	student	NORTH AMERICA	yes	0	1	0	yes	USA	MEXICO	0	1	0	0	0	0	0	0	MEXICO	acapulco	4	1	0	0	0	1	hotel				4	1	1	0	0	0	0
EN	full	2003	Morgan, J., et al. (2003). "A large outbreak of histoplasmosis among American travelers associated with a hotel in Acapulco, Mexico, spring 2001."Am J Trop Med Hyg69(6): 663-669.	262(148)	0	21	USA		TOURISM	0	1	0	0	student	NORTH AMERICA	yes	0	1	0	yes	USA	MEXICO	0	1	0	0	0	0	0	0	MEXICO	acapulco	4	1	0	0	0	1	hotel				4	1	1	0	0	0	0
EN	full	2003	Morgan, J., et al. (2003). "A large outbreak of histoplasmosis among American travelers associated with a hotel in Acapulco, Mexico, spring 2001."Am J Trop Med Hyg69(6): 663-669.	262(148)	0	21	USA		TOURISM	0	1	0	0	student	NORTH AMERICA	yes	0	1	0	yes	USA	MEXICO	0	1	0	0	0	0	0	0	MEXICO	acapulco	4	1	0	0	0	1	hotel				4	1	1	0	0	0	0
EN	full	2003	Morgan, J., et al. (2003). "A large outbreak of histoplasmosis among American travelers associated with a hotel in Acapulco, Mexico, spring 2001."Am J Trop Med Hyg69(6): 663-669.	262(148)	0	21	USA		TOURISM	0	1	0	0	student	NORTH AMERICA	yes	0	1	0	yes	USA	MEXICO	0	1	0	0	0	0	0	0	MEXICO	acapulco	4	1	0	0	0	1	hotel				4	1	1	0	1	1	0
EN	full	2003	Morgan, J., et al. (2003). "A large outbreak of histoplasmosis among American travelers associated with a hotel in Acapulco, Mexico, spring 2001."Am J Trop Med Hyg69(6): 663-669.	262(148)	0	21	USA		TOURISM	0	1	0	0	student	NORTH AMERICA	yes	0	1	0	yes	USA	MEXICO	0	1	0	0	0	0	0	0	MEXICO	acapulco	4	1	0	0	0	1	hotel				4	1	1	0	1	1	0
EN	full	2003	Morgan, J., et al. (2003). "A large outbreak of histoplasmosis among American travelers associated with a hotel in Acapulco, Mexico, spring 2001."Am J Trop Med Hyg69(6): 663-669.	262(148)	0	21	USA		TOURISM	0	1	0	0	student	NORTH AMERICA	yes	0	1	0	yes	USA	MEXICO	0	1	0	0	0	0	0	0	MEXICO	acapulco	4	1	0	0	0	1	hotel				4	1	1	0	1	1	0
EN	full	2003	Morgan, J., et al. (2003). "A large outbreak of histoplasmosis among American travelers associated with a hotel in Acapulco, Mexico, spring 2001."Am J Trop Med Hyg69(6): 663-669.	262(148)	0	21	USA		TOURISM	0	1	0	0	student	NORTH AMERICA	yes	0	1	0	yes	USA	MEXICO	0	1	0	0	0	0	0	0	MEXICO	acapulco	4	1	0	0	0	1	hotel				4	1	1	0	1	1	0
EN	full	2003	Morgan, J., et al. (2003). "A large outbreak of histoplasmosis among American travelers associated with a hotel in Acapulco, Mexico, spring 2001."Am J Trop Med Hyg69(6): 663-669.	262(148)	0	21	USA		TOURISM	0	1	0	0	student	NORTH AMERICA	yes	0	1	0	yes	USA	MEXICO	0	1	0	0	0	0	0	0	MEXICO	acapulco	4	1	0	0	0	1	hotel				4	1	1	0	1	1	0
EN	full	2003	Morgan, J., et al. (2003). "A large outbreak of histoplasmosis among American travelers associated with a hotel in Acapulco, Mexico, spring 2001."Am J Trop Med Hyg69(6): 663-669.	262(148)	0	21	USA		TOURISM	0	1	0	0	student	NORTH AMERICA	yes	0	1	0	yes	USA	MEXICO	0	1	0	0	0	0	0	0	MEXICO	acapulco	4	1	0	0	0	1	hotel				4	1	1	0	1	1	0
EN	full	2003	Morgan, J., et al. (2003). "A large outbreak of histoplasmosis among American travelers associated with a hotel in Acapulco, Mexico, spring 2001."Am J Trop Med Hyg69(6): 663-669.	262(148)	0	21	USA		TOURISM	0	1	0	0	student	NORTH AMERICA	yes	0	1	0	yes	USA	MEXICO	0	1	0	0	0	0	0	0	MEXICO	acapulco	4	1	0	0	0	1	hotel				4	1	1	0	1	1	0
EN	full	2003	Morgan, J., et al. (2003). "A large outbreak of histoplasmosis among American travelers associated with a hotel in Acapulco, Mexico, spring 2001."Am J Trop Med Hyg69(6): 663-669.	262(148)	0	21	USA		TOURISM	0	1	0	0	student	NORTH AMERICA	yes	0	1	0	yes	USA	MEXICO	0	1	0	0	0	0	0	0	MEXICO	acapulco	4	1	0	0	0	1	hotel				4	1	1	0	1	1	0
EN	full	2003	Morgan, J., et al. (2003). "A large outbreak of histoplasmosis among American travelers associated with a hotel in Acapulco, Mexico, spring 2001."Am J Trop Med Hyg69(6): 663-669.	262(148)	0	21	USA		TOURISM	0	1	0	0	student	NORTH AMERICA	yes	0	1	0	yes	USA	MEXICO	0	1	0	0	0	0	0	0	MEXICO	acapulco	4	1	0	0	0	1	hotel				4	1	1	0	1	1	0
EN	full	2003	Morgan, J., et al. (2003). "A large outbreak of histoplasmosis among American travelers associated with a hotel in Acapulco, Mexico, spring 2001."Am J Trop Med Hyg69(6): 663-669.	262(148)	0	21	USA		TOURISM	0	1	0	0	student	NORTH AMERICA	yes	0	1	0	yes	USA	MEXICO	0	1	0	0	0	0	0	0	MEXICO	acapulco	4	1	0	0	0	1	hotel				4	1	1	0	1	1	0
EN	full	2003	Morgan, J., et al. (2003). "A large outbreak of histoplasmosis among American travelers associated with a hotel in Acapulco, Mexico, spring 2001."Am J Trop Med Hyg69(6): 663-669.	262(148)	0	21	USA		TOURISM	0	1	0	0	student	NORTH AMERICA	yes	0	1	0	yes	USA	MEXICO	0	1	0	0	0	0	0	0	MEXICO	acapulco	4	1	0	0	0	1	hotel				4	1	1	0	1	1	0
EN	full	2003	Morgan, J., et al. (2003). "A large outbreak of histoplasmosis among American travelers associated with a hotel in Acapulco, Mexico, spring 2001."Am J Trop Med Hyg69(6): 663-669.	262(148)	0	21	USA		TOURISM	0	1	0	0	student	NORTH AMERICA	yes	0	1	0	yes	USA	MEXICO	0	1	0	0	0	0	0	0	MEXICO	acapulco	4	1	0	0	0	1	hotel				4	1	1	0	1	1	0
EN	full	2003	Morgan, J., et al. (2003). "A large outbreak of histoplasmosis among American travelers associated with a hotel in Acapulco, Mexico, spring 2001."Am J Trop Med Hyg69(6): 663-669.	262(148)	0	21	USA		TOURISM	0	1	0	0	student	NORTH AMERICA	yes	0	1	0	yes	USA	MEXICO	0	1	0	0	0	0	0	0	MEXICO	acapulco	4	1	0	0	0	1	hotel				4	1	1	0	1	1	0
EN	full	2003	Morgan, J., et al. (2003). "A large outbreak of histoplasmosis among American travelers associated with a hotel in Acapulco, Mexico, spring 2001."Am J Trop Med Hyg69(6): 663-669.	262(148)	0	21	USA		TOURISM	0	1	0	0	student	NORTH AMERICA	yes	0	1	0	yes	USA	MEXICO	0	1	0	0	0	0	0	0	MEXICO	acapulco	4	1	0	0	0	1	hotel				4	1	1	0	1	1	1
EN	full	2003	Morgan, J., et al. (2003). "A large outbreak of histoplasmosis among American travelers associated with a hotel in Acapulco, Mexico, spring 2001."Am J Trop Med Hyg69(6): 663-669.	262(148)	0	21	USA		TOURISM	0	1	0	0	student	NORTH AMERICA	yes	0	1	0	yes	USA	MEXICO	0	1	0	0	0	0	0	0	MEXICO	acapulco	4	1	0	0	0	1	hotel				4	1	1	0	1	1	1
EN	full	2003	Morgan, J., et al. (2003). "A large outbreak of histoplasmosis among American travelers associated with a hotel in Acapulco, Mexico, spring 2001."Am J Trop Med Hyg69(6): 663-669.	262(148)	0	21	USA		TOURISM	0	1	0	0	student	NORTH AMERICA	yes	0	1	0	yes	USA	MEXICO	0	1	0	0	0	0	0	0	MEXICO	acapulco	4	1	0	0	0	1	hotel				4	1	1	0	1	1	1
EN	full	2003	Morgan, J., et al. (2003). "A large outbreak of histoplasmosis among American travelers associated with a hotel in Acapulco, Mexico, spring 2001."Am J Trop Med Hyg69(6): 663-669.	262(148)	0	21	USA		TOURISM	0	1	0	0	student	NORTH AMERICA	yes	0	1	0	yes	USA	MEXICO	0	1	0	0	0	0	0	0	MEXICO	acapulco	4	1	0	0	0	1	hotel				4	1	1	0	1	1	1
EN	full	2003	Morgan, J., et al. (2003). "A large outbreak of histoplasmosis among American travelers associated with a hotel in Acapulco, Mexico, spring 2001."Am J Trop Med Hyg69(6): 663-669.	262(148)	1	21	USA		TOURISM	0	1	0	0	student	NORTH AMERICA	yes	0	1	0	yes	USA	MEXICO	0	1	0	0	0	0	0	0	MEXICO	acapulco	4	1	0	0	0	1	hotel				4	1	1	0	0	0	0
EN	full	2003	Morgan, J., et al. (2003). "A large outbreak of histoplasmosis among American travelers associated with a hotel in Acapulco, Mexico, spring 2001."Am J Trop Med Hyg69(6): 663-669.	262(148)	0	21	USA		TOURISM	0	1	0	0	student	NORTH AMERICA	yes	0	1	0	yes	USA	MEXICO	0	1	0	0	0	0	0	0	MEXICO	acapulco	4	1	0	0	0	1	hotel				4	1	1	0	1	1	0
EN	full	2003	Morgan, J., et al. (2003). "A large outbreak of histoplasmosis among American travelers associated with a hotel in Acapulco, Mexico, spring 2001."Am J Trop Med Hyg69(6): 663-669.	262(148)	0	21	USA		TOURISM	0	1	0	0	student	NORTH AMERICA	yes	0	1	0	yes	USA	MEXICO	0	1	0	0	0	0	0	0	MEXICO	acapulco	4	1	0	0	0	1	hotel				4	1	1	0	1	1	0
EN	full	2003	Morgan, J., et al. (2003). "A large outbreak of histoplasmosis among American travelers associated with a hotel in Acapulco, Mexico, spring 2001."Am J Trop Med Hyg69(6): 663-669.	262(148)	0	21	USA		TOURISM	0	1	0	0	student	NORTH AMERICA	yes	0	1	0	yes	USA	MEXICO	0	1	0	0	0	0	0	0	MEXICO	acapulco	4	1	0	0	0	1	hotel				4	1	1	0	1	1	0
EN	full	2003	Morgan, J., et al. (2003). "A large outbreak of histoplasmosis among American travelers associated with a hotel in Acapulco, Mexico, spring 2001."Am J Trop Med Hyg69(6): 663-669.	262(148)	0	21	USA		TOURISM	0	1	0	0	student	NORTH AMERICA	yes	0	1	0	yes	USA	MEXICO	0	1	0	0	0	0	0	0	MEXICO	acapulco	4	1	0	0	0	1	hotel				4	1	1	0	1	1	0
EN	full	2003	Morgan, J., et al. (2003). "A large outbreak of histoplasmosis among American travelers associated with a hotel in Acapulco, Mexico, spring 2001."Am J Trop Med Hyg69(6): 663-669.	262(148)	0	21	USA		TOURISM	0	1	0	0	student	NORTH AMERICA	yes	0	1	0	yes	USA	MEXICO	0	1	0	0	0	0	0	0	MEXICO	acapulco	4	1	0	0	0	1	hotel				4	1	1	0	1	1	0
EN	full	2003	Morgan, J., et al. (2003). "A large outbreak of histoplasmosis among American travelers associated with a hotel in Acapulco, Mexico, spring 2001."Am J Trop Med Hyg69(6): 663-669.	262(148)	0	21	USA		TOURISM	0	1	0	0	student	NORTH AMERICA	yes	0	1	0	yes	USA	MEXICO	0	1	0	0	0	0	0	0	MEXICO	acapulco	4	1	0	0	0	1	hotel				4	1	1	0	1	1	0
EN	full	2003	Morgan, J., et al. (2003). "A large outbreak of histoplasmosis among American travelers associated with a hotel in Acapulco, Mexico, spring 2001."Am J Trop Med Hyg69(6): 663-669.	262(148)	0	21	USA		TOURISM	0	1	0	0	student	NORTH AMERICA	yes	0	1	0	yes	USA	MEXICO	0	1	0	0	0	0	0	0	MEXICO	acapulco	4	1	0	0	0	1	hotel				4	1	1	0	1	1	0
biblio	full	1957	murray et al. 1957. benign pulmonary histoplasmosis (cave disease) in South Africa. South afr med j 31: 245-253				EUROPE		SPELEOLOGIST	1	0	0	0	speleologist	SOUTH AFRICA	no	1	0	1	no		SOUTH AFRICA	0	0	0	0	1	0	0	0	SOUTH AFRICA	thabazimbi,	1		1	0	0	0	no	1	4/4	1	3	1	1		1	1
biblio	full	1957	murray et al. 1957. benign pulmonary histoplasmosis (cave disease) in South Africa. South afr med j 31: 245-253				EUROPE		SPELEOLOGIST	1	0	0	0	speleologist	SOUTH AFRICA	no	1	0	1	no		SOUTH AFRICA	0	0	0	0	1	0	0	0	SOUTH AFRICA	thabazimbi,	1		1	0	0	0	no	1		1	3	1	1		1	1
biblio	full	1957	murray et al. 1957. benign pulmonary histoplasmosis (cave disease) in South Africa. South afr med j 31: 245-253				EUROPE		SPELEOLOGIST	1	0	0	0	speleologist	SOUTH AFRICA	no	1	0	1	no		SOUTH AFRICA	0	0	0	0	1	0	0	0	SOUTH AFRICA	thabazimbi,	1		1	0	0	0	no	1		1	3	1	1		1	1
biblio	full	1957	murray et al. 1957. benign pulmonary histoplasmosis (cave disease) in South Africa. South afr med j 31: 245-253				EUROPE		SPELEOLOGIST	1	0	0	0	speleologist	SOUTH AFRICA	no	1	0	1	no	EUROPE	SOUTH AFRICA	0	0	0	0	1	0	0	0	SOUTH AFRICA	thabazimbi,	1	1	1	0	0	0	no	1		1	3	1	1		1	1
biblio	full	1957	murray et al. 1957. benign pulmonary histoplasmosis (cave disease) in South Africa. South afr med j 31: 245-253		1	27	EUROPE		SPELEOLOGIST	1	0	0	0	speleologist	SOUTH AFRICA	no	1	0	1	no	EUROPE	SOUTH AFRICA	0	0	0	0	1	0	0	0	SOUTH AFRICA	johnson's pothole	1	1	1	0	0	0	no	1		0.7586	3	1	1	1	1	1	0
biblio	full	1957	murray et al. 1957. benign pulmonary histoplasmosis (cave disease) in South Africa. South afr med j 31: 245-253	64					TOURISM	0	1	0	0	student	SOUTH AFRICA	no	1	0	1	no	EUROPE	SOUTH AFRICA	0	0	0	0	1	0	0	0	SOUTH AFRICA	potgietersrust,	1	1	1	0	0	0	no	1	3/4	0.75	3	1	1		1	1
biblio	full	1957	murray et al. 1957. benign pulmonary histoplasmosis (cave disease) in South Africa. South afr med j 31: 245-253						TOURISM	0	1	0	0	student	SOUTH AFRICA	no	1	0	1	no	EUROPE	SOUTH AFRICA	0	0	0	0	1	0	0	0	SOUTH AFRICA	potgietersrust,	1	1	1	0	0	0	no	1		0.75	3	1	1		1	1
biblio	full	1957	murray et al. 1957. benign pulmonary histoplasmosis (cave disease) in South Africa. South afr med j 31: 245-253						TOURISM	0	1	0	0	student	SOUTH AFRICA	no	1	0	1	no		SOUTH AFRICA	0	0	0	0	1	0	0	0	SOUTH AFRICA	NR	1		1	0	0	0	no	1	7/7	1	3	1	1		1	1
biblio	full	1957	murray et al. 1957. benign pulmonary histoplasmosis (cave disease) in South Africa. South afr med j 31: 245-253						TOURISM	0	1	0	0	student	SOUTH AFRICA	no	1	0	1	no		SOUTH AFRICA	0	0	0	0	1	0	0	0	SOUTH AFRICA	NR	1		1	0	0	0	no	1		1	3	1	1		1	1
biblio	full	1957	murray et al. 1957. benign pulmonary histoplasmosis (cave disease) in South Africa. South afr med j 31: 245-253						TOURISM	0	1	0	0	student	SOUTH AFRICA	no	1	0	1	no		SOUTH AFRICA	0	0	0	0	1	0	0	0	SOUTH AFRICA	NR	1		1	0	0	0	no	1		1	3	1	1		1	1
biblio	full	1957	murray et al. 1957. benign pulmonary histoplasmosis (cave disease) in South Africa. South afr med j 31: 245-253						TOURISM	0	1	0	0	student	SOUTH AFRICA	no	1	0	1	no		SOUTH AFRICA	0	0	0	0	1	0	0	0	SOUTH AFRICA	NR	1		1	0	0	0	no	1		1	3	1	1		1	1
biblio	full	1957	murray et al. 1957. benign pulmonary histoplasmosis (cave disease) in South Africa. South afr med j 31: 245-253						TOURISM	0	1	0	0	student	SOUTH AFRICA	no	1	0	1	no		SOUTH AFRICA	0	0	0	0	1	0	0	0	SOUTH AFRICA	NR	1		1	0	0	0	no	1		1	3	1	1		1	1
biblio	full	1957	murray et al. 1957. benign pulmonary histoplasmosis (cave disease) in South Africa. South afr med j 31: 245-253						TOURISM	0	1	0	0	student	SOUTH AFRICA	no	1	0	1	no		SOUTH AFRICA	0	0	0	0	1	0	0	0	SOUTH AFRICA	NR	1		1	0	0	0	no	1		1	3	1	1		1	1
biblio	full	1957	murray et al. 1957. benign pulmonary histoplasmosis (cave disease) in South Africa. South afr med j 31: 245-253						TOURISM	0	1	0	0	student	SOUTH AFRICA	no	1	0	1	no		SOUTH AFRICA	0	0	0	0	1	0	0	0	SOUTH AFRICA	NR	1		1	0	0	0	no	1		1	3	1	1		1	1
biblio	full	1957	murray et al. 1957. benign pulmonary histoplasmosis (cave disease) in South Africa. South afr med j 31: 245-253		0	21	EUROPE		SPELEOLOGIST	1	0	0	0	speleologist	SOUTH AFRICA	no	1	0	1	no		SOUTH AFRICA	0	0	0	0	1	0	0	0	SOUTH AFRICA	johnson's pothole	1		1	0	0	0	no	1		1	3	1	1	0	1	1	1
biblio	full	1957	murray et al. 1957. benign pulmonary histoplasmosis (cave disease) in South Africa. South afr med j 31: 245-253						SPELEOLOGIST	1	0	0	0	speleologist	SOUTH AFRICA	no	1	0	1	no		SOUTH AFRICA	0	0	0	0	1	0	0	0	SOUTH AFRICA	johnson's pothole	1		1	0	0	0	no	1		1	3	1	1		1	1
biblio	full	1957	murray et al. 1957. benign pulmonary histoplasmosis (cave disease) in South Africa. South afr med j 31: 245-253						SPELEOLOGIST	1	0	0	0	speleologist	SOUTH AFRICA	no	1	0	1	no		SOUTH AFRICA	0	0	0	0	1	0	0	0	SOUTH AFRICA	johnson's pothole	1		1	0	0	0	no	1		1	3	1	0	0	0	0	0
biblio	full	1957	murray et al. 1957. benign pulmonary histoplasmosis (cave disease) in South Africa. South afr med j 31: 245-253						SPELEOLOGIST	1	0	0	0	speleologist	SOUTH AFRICA	no	1	0	1	no		SOUTH AFRICA	0	0	0	0	1	0	0	0	SOUTH AFRICA	johnson's pothole	1		1	0	0	0	no	1		1	3	1	0	0	0	0	0
biblio	full	1957	murray et al. 1957. benign pulmonary histoplasmosis (cave disease) in South Africa. South afr med j 31: 245-253						SPELEOLOGIST	1	0	0	0	speleologist	SOUTH AFRICA	no	1	0	1	no		SOUTH AFRICA	0	0	0	0	1	0	0	0	SOUTH AFRICA	johnson's pothole	1		1	0	0	0	no	1		1	3	1	0	0	0	0	0
EN	full	1995	Noel, M., et al. (1995). "[Epidemic of pulmonary histoplasmosis after visiting a cave in New Caledonia]."Sante5(4): 219-225.		1	37	ANTILLE		SPELEOLOGIST	1	0	0	0	speleologist	AUSTRALIA E OCEANIA	no	1	0	1	no	EUROPE	NEW CALEDONIA	0	0	0	0	0	1	0	1	NEW CALEDONIA	sud, Touaurou	1	1	1	0	0	0	no	1		0.875	3	1	1	0	1	0	1
EN	full	1995	Noel, M., et al. (1995). "[Epidemic of pulmonary histoplasmosis after visiting a cave in New Caledonia]."Sante5(4): 219-225.		0	38	EUROPE		SPELEOLOGIST	1	0	0	0	speleologist	AUSTRALIA E OCEANIA	no	1	0	1	no	EUROPE	NEW CALEDONIA	0	0	0	0	0	1	0	1	NEW CALEDONIA	sud, Touaurou	1	1	1	0	0	0	no	1		0.875	3	1	0	0	0	0	0
EN	full	1995	Noel, M., et al. (1995). "[Epidemic of pulmonary histoplasmosis after visiting a cave in New Caledonia]."Sante5(4): 219-225.		1	22	EUROPE		SPELEOLOGIST	1	0	0	0	speleologist	AUSTRALIA E OCEANIA	no	1	0	1	no	EUROPE	NEW CALEDONIA	0	0	0	0	0	1	0	1	NEW CALEDONIA	sud, Touaurou	1	1	1	0	0	0	no	1		0.875	3	1	1	0	1	1	0
EN	full	1995	Noel, M., et al. (1995). "[Epidemic of pulmonary histoplasmosis after visiting a cave in New Caledonia]."Sante5(4): 219-225.		1	40	EUROPE		SPELEOLOGIST	1	0	0	0	speleologist	AUSTRALIA E OCEANIA	no	1	0	1	no	EUROPE	NEW CALEDONIA	0	0	0	0	0	1	0	1	NEW CALEDONIA	sud, Touaurou	1	1	1	0	0	0	no	1		0.875	3	1	1	0	1	1	1
EN	full	1995	Noel, M., et al. (1995). "[Epidemic of pulmonary histoplasmosis after visiting a cave in New Caledonia]."Sante5(4): 219-225.		1	31	EUROPE		SPELEOLOGIST	1	0	0	0	speleologist	AUSTRALIA E OCEANIA	no	1	0	1	no	EUROPE	NEW CALEDONIA	0	0	0	0	0	1	0	1	NEW CALEDONIA	sud, Touaurou	1	1	1	0	0	0	no	1		0.875	3	1	1	0	1	1	1
EN	full	1995	Noel, M., et al. (1995). "[Epidemic of pulmonary histoplasmosis after visiting a cave in New Caledonia]."Sante5(4): 219-225.		1	44	EUROPE		SPELEOLOGIST	1	0	0	0	speleologist	AUSTRALIA E OCEANIA	no	1	0	1	no	EUROPE	NEW CALEDONIA	0	0	0	0	0	1	0	1	NEW CALEDONIA	sud, Touaurou	1	1	1	0	0	0	no	1		0.875	3	1	1	0	1	1	1
EN	full	1995	Noel, M., et al. (1995). "[Epidemic of pulmonary histoplasmosis after visiting a cave in New Caledonia]."Sante5(4): 219-225.		0	46	EUROPE	smoker	SPELEOLOGIST	1	0	0	0	speleologist	AUSTRALIA E OCEANIA	no	1	0	1	no	EUROPE	NEW CALEDONIA	0	0	0	0	0	1	0	1	NEW CALEDONIA	sud, Touaurou	1	1	1	0	0	0	no	1		0.875	3	1	0	0	0	0	0
EN	full	1995	Noel, M., et al. (1995). "[Epidemic of pulmonary histoplasmosis after visiting a cave in New Caledonia]."Sante5(4): 219-225.		1	29	EUROPE	smoker	SPELEOLOGIST	1	0	0	0	speleologist	AUSTRALIA E OCEANIA	no	1	0	1	no	EUROPE	NEW CALEDONIA	0	0	0	0	0	1	0	1	NEW CALEDONIA	sud, Touaurou	1	1	1	0	0	0	no	1		0.875	3	1	1	0	0	0	0
EN	full	1995	Noel, M., et al. (1995). "[Epidemic of pulmonary histoplasmosis after visiting a cave in New Caledonia]."Sante5(4): 219-225.		1	24	EUROPE	smoker	SPELEOLOGIST	1	0	0	0	speleologist	AUSTRALIA E OCEANIA	no	1	0	1	no	EUROPE	NEW CALEDONIA	0	0	0	0	0	1	0	1	NEW CALEDONIA	sud, Touaurou	1	1	1	0	0	0	no	1		0.875	3	1	1	0	0	0	0
EN	full	1995	Noel, M., et al. (1995). "[Epidemic of pulmonary histoplasmosis after visiting a cave in New Caledonia]."Sante5(4): 219-225.		0	32	EUROPE	smoker	SPELEOLOGIST	1	0	0	0	speleologist	AUSTRALIA E OCEANIA	no	1	0	1	no	EUROPE	NEW CALEDONIA	0	0	0	0	0	1	0	1	NEW CALEDONIA	sud, Touaurou	1	1	1	0	0	0	no	1		0.875	3	1	1	0	1	1	1
EN	full	1995	Noel, M., et al. (1995). "[Epidemic of pulmonary histoplasmosis after visiting a cave in New Caledonia]."Sante5(4): 219-225.		0	38	INDONESIA	smoker	SPELEOLOGIST	1	0	0	0	speleologist	AUSTRALIA E OCEANIA	no	1	0	1	no	EUROPE	NEW CALEDONIA	0	0	0	0	0	1	0	1	NEW CALEDONIA	sud, Touaurou	1	1	1	0	0	0	no	1		0.875	3	1	1	0	1	0	1
EN	full	1995	Noel, M., et al. (1995). "[Epidemic of pulmonary histoplasmosis after visiting a cave in New Caledonia]."Sante5(4): 219-225.		1	41	POLYNESIA		SPELEOLOGIST	1	0	0	0	speleologist	AUSTRALIA E OCEANIA	no	1	0	1	no	EUROPE	NEW CALEDONIA	0	0	0	0	0	1	0	1	NEW CALEDONIA	sud, Touaurou	1	1	1	0	0	0	no	1		0.875	3	1	1	0	1	0	1
EN	full	1995	Noel, M., et al. (1995). "[Epidemic of pulmonary histoplasmosis after visiting a cave in New Caledonia]."Sante5(4): 219-225.		1	19	POLYNESIA		SPELEOLOGIST	1	0	0	0	speleologist	AUSTRALIA E OCEANIA	no	1	0	1	no	EUROPE	NEW CALEDONIA	0	0	0	0	0	1	0	1	NEW CALEDONIA	sud, Touaurou	1	1	1	0	0	0	no	1		0.875	3	1	1	0	1	0	1
EN	full	1995	Noel, M., et al. (1995). "[Epidemic of pulmonary histoplasmosis after visiting a cave in New Caledonia]."Sante5(4): 219-225.		1	22	WALLIS	smoker	SPELEOLOGIST	1	0	0	0	speleologist	AUSTRALIA E OCEANIA	no	1	0	1	no	EUROPE	NEW CALEDONIA	0	0	0	0	0	1	0	1	NEW CALEDONIA	sud, Touaurou	1	1	1	0	0	0	no	1		0.875	3	1	1	0	1	1	1
EN	full	1995	Noel, M., et al. (1995). "[Epidemic of pulmonary histoplasmosis after visiting a cave in New Caledonia]."Sante5(4): 219-225.		0	32	EUROPE	bronchite	SPELEOLOGIST	1	0	0	0	speleologist	AUSTRALIA E OCEANIA	no	1	0	1	no	WALLIS	NEW CALEDONIA	0	0	0	0	0	1	0	1	NEW CALEDONIA	sud, Touaurou	1	1	1	0	0	0	no	1		0.875	3	1	1	0	0	0	0
EN	full	1995	Noel, M., et al. (1995). "[Epidemic of pulmonary histoplasmosis after visiting a cave in New Caledonia]."Sante5(4): 219-225.		0	44	EUROPE		SPELEOLOGIST	1	0	0	0	speleologist	AUSTRALIA E OCEANIA	no	1	0	1	no	WALLIS	NEW CALEDONIA	0	0	0	0	0	1	0	1	NEW CALEDONIA	sud, Touaurou	1	1	1	0	0	0	no	1		0.875	3	1	1	0	1	1	1
EN	full	1995	Noel, M., et al. (1995). "[Epidemic of pulmonary histoplasmosis after visiting a cave in New Caledonia]."Sante5(4): 219-225.		1	22	EUROPE		SPELEOLOGIST	1	0	0	0	speleologist	AUSTRALIA E OCEANIA	no	1	0	1	no	VIETNAM	NEW CALEDONIA	0	0	0	0	0	1	0	1	NEW CALEDONIA	sud, Touaurou	1	1	1	0	0	0	no	1		0.875	3	1	1	0	1	1	1
EN	full	1995	Noel, M., et al. (1995). "[Epidemic of pulmonary histoplasmosis after visiting a cave in New Caledonia]."Sante5(4): 219-225.		1	34	EUROPE	smoker	SPELEOLOGIST	1	0	0	0	speleologist	AUSTRALIA E OCEANIA	no	1	0	1	no	INDONESIA	NEW CALEDONIA	0	0	0	0	0	1	0	1	NEW CALEDONIA	sud, Touaurou	1	1	1	0	0	0	no	1		0.875	3	1	1	0	1	1	1
EN	full	1995	Noel, M., et al. (1995). "[Epidemic of pulmonary histoplasmosis after visiting a cave in New Caledonia]."Sante5(4): 219-225.		1	39	EUROPE	smoker	SPELEOLOGIST	1	0	0	0	speleologist	AUSTRALIA E OCEANIA	no	1	0	1	no	ANTILLE	NEW CALEDONIA	0	0	0	0	0	1	0	1	NEW CALEDONIA	sud, Touaurou	1	1	1	0	0	0	no	1		0.875	3	1	1	0	1	1	1
EN	full	1995	Noel, M., et al. (1995). "[Epidemic of pulmonary histoplasmosis after visiting a cave in New Caledonia]."Sante5(4): 219-225.		1	32	VIETNAM		SPELEOLOGIST	1	0	0	0	speleologist	AUSTRALIA E OCEANIA	no	1	0	1	no	POLYNESIA	NEW CALEDONIA	0	0	0	0	0	1	0	1	NEW CALEDONIA	sud, Touaurou	1	1	1	0	0	0	no	1		0.875	3	1	1	0	1	1	1
EN	full	1995	Noel, M., et al. (1995). "[Epidemic of pulmonary histoplasmosis after visiting a cave in New Caledonia]."Sante5(4): 219-225.		1	27	WALLIS		SPELEOLOGIST	1	0	0	0	speleologist	AUSTRALIA E OCEANIA	no	1	0	1	no	POLYNESIA	NEW CALEDONIA	0	0	0	0	0	1	0	1	NEW CALEDONIA	sud, Touaurou	1	1	1	0	0	0	no	1		0.875	3	1	1	0	1	1	1
EN	full	2009	Norman, F. F., et al. (2009). "Imported histoplasmosis: two distinct profiles in travelers and immigrants."J Travel Med16(4): 258-262.	5	1	59	SPAIN		TOURISM	0	1	0	0	tourism	SOUTH AMERICA	yes	0	1	0	no	SPAIN	EL SALVADOR	0	0	1	0	0	0	0	0	PERU	sud, Touaurou	1	1	1	0	0	0	no	0	caso sporadico		4	1	1	0	0	0	0
EN	full	2009	Norman, F. F., et al. (2009). "Imported histoplasmosis: two distinct profiles in travelers and immigrants."J Travel Med16(4): 258-262.		0	26	SPAIN		VOLUNTEER	0	0	0	0	volunteer	CENTRAL AMERICA	yes	0	1	0	no	SPAIN	PANAMA	0	0	1	0	0	0	0	0	EL SALVADOR	NR	1	1	1	1	0	1	no	0	caso sporadico		4	1	1	0	0	0	0
EN	full	2009	Norman, F. F., et al. (2009). "Imported histoplasmosis: two distinct profiles in travelers and immigrants."J Travel Med16(4): 258-262.		1	26	SPAIN		PROFESSIONAL	0	0	1	0	professional travel	CENTRAL AMERICA	yes	0	1	0	no	SPAIN	ECUADOR	0	0	1	0	0	0	0	0	PANAMA	NR	3	1	0	1	0	1	no	0	caso sporadico		4	1	1	0	1	0	0
EN	full	2009	Norman, F. F., et al. (2009). "Imported histoplasmosis: two distinct profiles in travelers and immigrants."J Travel Med16(4): 258-262.		0	27	SPAIN		TOURISM	0	1	0	0	tourism	SOUTH AMERICA	yes	0	1	0	no	SPAIN	PERU	0	0	0	1	0	0	0	0	ECUADOR	NR	1	1	1	0	0	0	no	0	caso sporadico		4	1	1	0	1	0	0
EN	full	2009	Norman, F. F., et al. (2009). "Imported histoplasmosis: two distinct profiles in travelers and immigrants."J Travel Med16(4): 258-262.		1	59	SPAIN		PROFESSIONAL	0	0	1	0	biologist	CENTRAL AMERICA	yes	0	1	0	no	SPAIN	COSTA RICA, GUYANA, ECUADOR, ARGENTINA	0	0	0	1	0	0	0	0	COSTA RICA, GUYANA, ECUADOR, ARGENTINA	NR	4	1	0	0	1	1	no	0	caso sporadico		4	1	1	0	0	0	0
EN	full	2010	ohno et al, an outbreak of histoplasmosis among healthy young japanese women after traveling to South East Asia. Inter med 2010; 49:491-495		0	28	JAPAN	no	TOURISM	0	1	0	0	tourism	SOUTH EAST ASIA	no	1	0	1	no	JAPAN	MALAYSIA	0	0	0	0	0	1	1	0	MALAYSIA	langkawi island	4	1	0	0	1	0	NR	1		1	3	1	1	0	0	0	0
EN	full	2010	ohno et al, an outbreak of histoplasmosis among healthy young japanese women after traveling to South East Asia. Inter med 2010; 49:491-495		0	29	JAPAN	no	TOURISM	0	1	0	0	tourism	SOUTH EAST ASIA	no	1	0	1	no	JAPAN	MALAYSIA	0	0	0	0	0	1	1	0	MALAYSIA	langkawi island	4	1	0	0	1	0	NR	1		1	3	1	1	0	0	0	0
EN	full	2001	Panizo et al. Histoplasmosis pulmonar associada con visita a cuevas. Descripcion de un brote epidemico y revision de la literatura. Rev Soc Ven Microbiol 21(1)																		VENEZUELA	VENEZUELA	0	0	0	1	0	0	0	0	0	0	0	0	1	0	0	0		1		0.9117	3	1	1	0	1	1	0
EN	full	2001	Panizo et al. Histoplasmosis pulmonar associada con visita a cuevas. Descripcion de un brote epidemico y revision de la literatura. Rev Soc Ven Microbiol 21(1)	31																	VENEZUELA	VENEZUELA	0	0	0	1	0	0	0	0	0	0	0	0	1	0	0	0		1	31\34	0.9117	3	1	1	0	1	1	0
EN	full	2001	Panizo et al. Histoplasmosis pulmonar associada con visita a cuevas. Descripcion de un brote epidemico y revision de la literatura. Rev Soc Ven Microbiol 21(1)																		VENEZUELA	VENEZUELA	0	0	0	1	0	0	0	0	0	0	0	0	1	0	0	0		1		0.9117	3	1	1	0	1	1	0
EN	full	2001	Panizo et al. Histoplasmosis pulmonar associada con visita a cuevas. Descripcion de un brote epidemico y revision de la literatura. Rev Soc Ven Microbiol 21(1)																		VENEZUELA	VENEZUELA	0	0	0	1	0	0	0	0	0	0	0	0	1	0	0	0		1		0.9117	3	1	1	0	1	1	0
EN	full	2001	Panizo et al. Histoplasmosis pulmonar associada con visita a cuevas. Descripcion de un brote epidemico y revision de la literatura. Rev Soc Ven Microbiol 21(1)																		VENEZUELA	VENEZUELA	0	0	0	1	0	0	0	0	0	0	0	0	1	0	0	0		1		0.9117	3	1	1	0	1	1	0
EN	full	2001	Panizo et al. Histoplasmosis pulmonar associada con visita a cuevas. Descripcion de un brote epidemico y revision de la literatura. Rev Soc Ven Microbiol 21(1)																		VENEZUELA	VENEZUELA	0	0	0	1	0	0	0	0	0	0	0	0	1	0	0	0		1		0.9117	3	1	1	0	1	1	0
EN	full	2001	Panizo et al. Histoplasmosis pulmonar associada con visita a cuevas. Descripcion de un brote epidemico y revision de la literatura. Rev Soc Ven Microbiol 21(1)																		VENEZUELA	VENEZUELA	0	0	0	1	0	0	0	0	0	0	0	0	1	0	0	0		1		0.9117	3	1	1	0	1	1	0
EN	full	2001	Panizo et al. Histoplasmosis pulmonar associada con visita a cuevas. Descripcion de un brote epidemico y revision de la literatura. Rev Soc Ven Microbiol 21(1)																		VENEZUELA	VENEZUELA	0	0	0	1	0	0	0	0	0	0	0	0	1	0	0	0		1		0.9117	3	1	1	0	1	1	0
EN	full	2001	Panizo et al. Histoplasmosis pulmonar associada con visita a cuevas. Descripcion de un brote epidemico y revision de la literatura. Rev Soc Ven Microbiol 21(1)																		VENEZUELA	VENEZUELA	0	0	0	1	0	0	0	0	0	0	0	0	1	0	0	0		1		0.9117	3	1	1	0	1	1	0
EN	full	2001	Panizo et al. Histoplasmosis pulmonar associada con visita a cuevas. Descripcion de un brote epidemico y revision de la literatura. Rev Soc Ven Microbiol 21(1)																		VENEZUELA	VENEZUELA	0	0	0	1	0	0	0	0	0	0	0	0	1	0	0	0		1		0.9117	3	1	1	0	1	1	0
EN	full	2001	Panizo et al. Histoplasmosis pulmonar associada con visita a cuevas. Descripcion de un brote epidemico y revision de la literatura. Rev Soc Ven Microbiol 21(1)																		VENEZUELA	VENEZUELA	0	0	0	1	0	0	0	0	0	0	0	0	1	0	0	0		1		0.9117	3	1	1	0	1	1	0
EN	full	2001	Panizo et al. Histoplasmosis pulmonar associada con visita a cuevas. Descripcion de un brote epidemico y revision de la literatura. Rev Soc Ven Microbiol 21(1)																		VENEZUELA	VENEZUELA	0	0	0	1	0	0	0	0	0	0	0	0	1	0	0	0		1		0.9117	3	1	1	0	1	1	0
EN	full	2001	Panizo et al. Histoplasmosis pulmonar associada con visita a cuevas. Descripcion de un brote epidemico y revision de la literatura. Rev Soc Ven Microbiol 21(1)																		VENEZUELA	VENEZUELA	0	0	0	1	0	0	0	0	0	0	0	0	1	0	0	0		1		0.9117	3	1	1	0	1	1	0
EN	full	2001	Panizo et al. Histoplasmosis pulmonar associada con visita a cuevas. Descripcion de un brote epidemico y revision de la literatura. Rev Soc Ven Microbiol 21(1)																		VENEZUELA	VENEZUELA	0	0	0	1	0	0	0	0	0	0	0	0	1	0	0	0		1		0.9117	3	1	1	0	1	1	0
EN	full	2001	Panizo et al. Histoplasmosis pulmonar associada con visita a cuevas. Descripcion de un brote epidemico y revision de la literatura. Rev Soc Ven Microbiol 21(1)																		VENEZUELA	VENEZUELA	0	0	0	1	0	0	0	0	0	0	0	0	1	0	0	0		1		0.9117	3	1	1	0	1	1	0
EN	full	2001	Panizo et al. Histoplasmosis pulmonar associada con visita a cuevas. Descripcion de un brote epidemico y revision de la literatura. Rev Soc Ven Microbiol 21(1)																		VENEZUELA	VENEZUELA	0	0	0	1	0	0	0	0	0	0	0	0	1	0	0	0		1		0.9117	3	1	1	0	1	1	0
EN	full	2001	Panizo et al. Histoplasmosis pulmonar associada con visita a cuevas. Descripcion de un brote epidemico y revision de la literatura. Rev Soc Ven Microbiol 21(1)																		VENEZUELA	VENEZUELA	0	0	0	1	0	0	0	0	0	0	0	0	1	0	0	0		1		0.9117	3	1	1	0	1	1	0
EN	full	2001	Panizo et al. Histoplasmosis pulmonar associada con visita a cuevas. Descripcion de un brote epidemico y revision de la literatura. Rev Soc Ven Microbiol 21(1)																		VENEZUELA	VENEZUELA	0	0	0	1	0	0	0	0	0	0	0	0	1	0	0	0		1		0.9117	3	1	1	0	1	1	0
EN	full	2001	Panizo et al. Histoplasmosis pulmonar associada con visita a cuevas. Descripcion de un brote epidemico y revision de la literatura. Rev Soc Ven Microbiol 21(1)																		VENEZUELA	VENEZUELA	0	0	0	1	0	0	0	0	0	0	0	0	1	0	0	0		1		0.9117	3	1	1	0	1	1	0
EN	full	2001	Panizo et al. Histoplasmosis pulmonar associada con visita a cuevas. Descripcion de un brote epidemico y revision de la literatura. Rev Soc Ven Microbiol 21(1)																		VENEZUELA	VENEZUELA	0	0	0	1	0	0	0	0	0	0	0	0	1	0	0	0		1		0.9117	3	1	1	0	1	1	0
EN	full	2001	Panizo et al. Histoplasmosis pulmonar associada con visita a cuevas. Descripcion de un brote epidemico y revision de la literatura. Rev Soc Ven Microbiol 21(1)																		VENEZUELA	VENEZUELA	0	0	0	1	0	0	0	0	0	0	0	0	1	0	0	0		1		0.9117	3	1	1	0	1	1	0
EN	full	2001	Panizo et al. Histoplasmosis pulmonar associada con visita a cuevas. Descripcion de un brote epidemico y revision de la literatura. Rev Soc Ven Microbiol 21(1)																		VENEZUELA	VENEZUELA	0	0	0	1	0	0	0	0	0	0	0	0	1	0	0	0		1		0.9117	3	1	1	0	1	1	0
EN	full	2001	Panizo et al. Histoplasmosis pulmonar associada con visita a cuevas. Descripcion de un brote epidemico y revision de la literatura. Rev Soc Ven Microbiol 21(1)																		VENEZUELA	VENEZUELA	0	0	0	1	0	0	0	0	0	0	0	0	1	0	0	0		1		0.9117	3	1	1	0	1	1	0
EN	full	2001	Panizo et al. Histoplasmosis pulmonar associada con visita a cuevas. Descripcion de un brote epidemico y revision de la literatura. Rev Soc Ven Microbiol 21(1)																		VENEZUELA	VENEZUELA	0	0	0	1	0	0	0	0	0	0	0	0	1	0	0	0		1		0.9117	3	1	1	0	1	1	0
EN	full	2001	Panizo et al. Histoplasmosis pulmonar associada con visita a cuevas. Descripcion de un brote epidemico y revision de la literatura. Rev Soc Ven Microbiol 21(1)																		VENEZUELA	VENEZUELA	0	0	0	1	0	0	0	0	0	0	0	0	1	0	0	0		1		0.9117	3	1	1	0	1	1	0
EN	full	2001	Panizo et al. Histoplasmosis pulmonar associada con visita a cuevas. Descripcion de un brote epidemico y revision de la literatura. Rev Soc Ven Microbiol 21(1)																		VENEZUELA	VENEZUELA	0	0	0	1	0	0	0	0	0	0	0	0	1	0	0	0		1		0.9117	3	1	1	0	1	1	0
EN	full	2001	Panizo et al. Histoplasmosis pulmonar associada con visita a cuevas. Descripcion de un brote epidemico y revision de la literatura. Rev Soc Ven Microbiol 21(1)																		VENEZUELA	VENEZUELA	0	0	0	1	0	0	0	0	0	0	0	0	1	0	0	0		1		0.9117	3	1	1	0	1	1	0
EN	full	2001	Panizo et al. Histoplasmosis pulmonar associada con visita a cuevas. Descripcion de un brote epidemico y revision de la literatura. Rev Soc Ven Microbiol 21(1)																		VENEZUELA	VENEZUELA	0	0	0	1	0	0	0	0	0	0	0	0	1	0	0	0		1		0.9117	3	1	1	0	1	1	0
EN	full	2001	Panizo et al. Histoplasmosis pulmonar associada con visita a cuevas. Descripcion de un brote epidemico y revision de la literatura. Rev Soc Ven Microbiol 21(1)																		VENEZUELA	VENEZUELA	0	0	0	1	0	0	0	0	0	0	0	0	1	0	0	0		1		0.9117	3	1	1	0	1	1	0
EN	full	2001	Panizo et al. Histoplasmosis pulmonar associada con visita a cuevas. Descripcion de un brote epidemico y revision de la literatura. Rev Soc Ven Microbiol 21(1)																		VENEZUELA	VENEZUELA	0	0	0	1	0	0	0	0	0	0	0	0	1	0	0	0		1		0.9117	3	1	1	0	1	1	0
EN	full	2001	Panizo et al. Histoplasmosis pulmonar associada con visita a cuevas. Descripcion de un brote epidemico y revision de la literatura. Rev Soc Ven Microbiol 21(1)																		VENEZUELA	VENEZUELA	0	0	0	1	0	0	0	0	0	0	0	0	1	0	0	0		1		0.9117	3	1	1	0	1	1	0
biblio	full	1986	sacks et al. 1986 An outbreak and review of cave associated histoplasmosis capsulati. J med vet mycol 24: 313-318		1	27	USA	smoker, esofagitis, previous isoniazide profilaxis	TOURISM	0	1	0	0	student	USA	no	1	1	0	yes	USA	FLORIDA	1	0	0	0	0	0	0	0	FLORIDA	NR	1		1	0	0	0	no	1		1	3	1	1	1	1	1	1
biblio	full	1986	sacks et al. 1986 An outbreak and review of cave associated histoplasmosis capsulati. J med vet mycol 24: 313-320		1	22	USA	no	PROFESSIONAL	0	0	1	0	professional travel	USA	no	1	1	0	yes	USA	FLORIDA	1	0	0	0	0	0	0	0	FLORIDA	NR	1		1	0	0	1	no	1	3/3	1	3	1	1	0	1	1	0
biblio	full	1986	sacks et al. 1986 An outbreak and review of cave associated histoplasmosis capsulati. J med vet mycol 24: 313-321		1	36	USA	no	PROFESSIONAL	0	0	1	0	professional travel	USA	no	1	1	0	yes	USA	FLORIDA	1	0	0	0	0	0	0	0	FLORIDA	NR	1		1	0	0	1	no	1		1	3	1	1	0	0	0	0
EN	full	2015	segel, rozemann, lindsley et al. Histoplasmosis in israeli travelers. Am j trop med hyg 2015; 92(6):1168-72		1	31	ISRAEL			0	0	0	0		SOUTH AMERICA	yes	0	1	0	no	ISRAEL	CENTRAL AMERICA, GUATEMALA	0	0	1	0	0	0	0	0	SOUTH AMERICA, BOLIVIA	NR	1	1	1	0	0	0	no	0	caso sporadico		4	1	1	0	0	0	0
EN	full	2015	segel, rozemann, lindsley et al. Histoplasmosis in israeli travelers. Am j trop med hyg 2015; 92(6):1168-72		0	31	ISRAEL			0	0	0	0		CENTRAL AMERICA	yes	0	1	0	no	ISRAEL	SOUTH AMERICA, BOLIVIA	0	0	1	0	0	0	0	0	CENTRAL AMERICA, GUATEMALA	NR	1	1	1	0	0	0	no	0	caso sporadico		4	1	1	0	0	0	0
EN	full	2015	segel, rozemann, lindsley et al. Histoplasmosis in israeli travelers. Am j trop med hyg 2015; 92(6):1168-72		0	31	ISRAEL			0	0	0	0		SOUTH AMERICA	yes	0	1	0	no	ISRAEL	SOUTH AMERICA, BOLIVIA	0	0	1	0	0	0	0	0	PERU	NR	1	1	1	0	0	0	no	0	caso sporadico		4	1	1	0	1	1	1
EN	full	2015	segel, rozemann, lindsley et al. Histoplasmosis in israeli travelers. Am j trop med hyg 2015; 92(6):1168-72	23	0	31	ISRAEL			0	0	0	0		CENTRAL AMERICA	yes	0	1	0	no	ISRAEL	COSTA RICA	0	0	0	1	0	0	0	0	CENTRAL AMERICA, GUATEMALA	NR	1	1	1	0	0	0	no	0	caso sporadico		4	1	1	0	1	1	1
EN	full	2015	segel, rozemann, lindsley et al. Histoplasmosis in israeli travelers. Am j trop med hyg 2015; 92(6):1168-72		1	31	ISRAEL			0	0	0	0		CENTRAL AMERICA	yes	0	1	0	no	ISRAEL	SOUTH AMERICA	0	0	0	1	0	0	0	0	CENTRAL AMERICA, GUATEMALA	NR	1	1	1	0	0	0	no	0	caso sporadico		4	1	1	0	1	1	1
EN	full	2015	segel, rozemann, lindsley et al. Histoplasmosis in israeli travelers. Am j trop med hyg 2015; 92(6):1168-72		1	31	ISRAEL			0	0	0	0		SOUTH AMERICA	yes	0	1	0	no	ISRAEL	CENTRAL AMERICA, GUATEMALA	0	0	0	1	0	0	0	0	SOUTH AMERICA, BOLIVIA	NR	1	1	1	0	0	0	no	0	caso sporadico		4	1	1	0	1	1	1
EN	full	2015	segel, rozemann, lindsley et al. Histoplasmosis in israeli travelers. Am j trop med hyg 2015; 92(6):1168-72		1	31	ISRAEL			0	0	0	0		SOUTH AMERICA	yes	0	1	0	no	ISRAEL	MEXICO	0	0	0	1	0	0	0	0	SOUTH AMERICA	NR	1	1	1	0	0	0	no	0	caso sporadico		4	1	1	0	1	1	1
EN	full	2015	segel, rozemann, lindsley et al. Histoplasmosis in israeli travelers. Am j trop med hyg 2015; 92(6):1168-72		0	31	ISRAEL			0	0	0	0		CENTRAL AMERICA	yes	0	1	0	no	ISRAEL	GUATEMALA	0	0	0	1	0	0	0	0	CENTRAL AMERICA, GUATEMALA	NR	1	1	1	0	0	0	no	0	caso sporadico		4	1	1	0	1	1	1
EN	full	2015	segel, rozemann, lindsley et al. Histoplasmosis in israeli travelers. Am j trop med hyg 2015; 92(6):1168-72		1	31	ISRAEL			0	0	0	0		CENTRAL AMERICA	yes	0	1	0	no	ISRAEL	GUATEMALA	0	0	0	1	0	0	0	0	CENTRAL AMERICA, GUATEMALA	NR	1	1	1	0	0	0	no	0	caso sporadico		4	1	1	0	1	1	1
EN	full	2015	segel, rozemann, lindsley et al. Histoplasmosis in israeli travelers. Am j trop med hyg 2015; 92(6):1168-72		1	31	ISRAEL			0	0	0	0		CENTRAL AMERICA	yes	0	1	0	no	ISRAEL	CENTRAL AMERICA, GUATEMALA	0	0	0	1	0	0	0	0	GUATEMALA	NR	1	1	1	0	0	0	no	0	caso sporadico		4	1	0	0	1	1	1
EN	full	2015	segel, rozemann, lindsley et al. Histoplasmosis in israeli travelers. Am j trop med hyg 2015; 92(6):1168-72		0	31	ISRAEL			0	0	0	0		SOUTH AMERICA	yes	0	1	0	no	ISRAEL	CENTRAL-SOUTH AMERICA	0	0	1	0	0	0	0	0	SOUTH AMERICA	NR	4	1	0	0	1	0	no	0	caso sporadico		4	1	1	0	1	1	1
EN	full	2015	segel, rozemann, lindsley et al. Histoplasmosis in israeli travelers. Am j trop med hyg 2015; 92(6):1168-72		1	31	ISRAEL			0	0	0	0		SOUTH AMERICA	yes	0	1	0	no	ISRAEL	CENTRAL AMERICA	0	0	1	0	0	0	0	0	BOLIVIA, PERU	NR	1	1	1	0	1	0	no	0	caso sporadico		4	1	1	0	0	0	0
EN	full	2015	segel, rozemann, lindsley et al. Histoplasmosis in israeli travelers. Am j trop med hyg 2015; 92(6):1168-72		1	31	ISRAEL			0	0	0	0		CENTRAL AMERICA	yes	0	1	0	no	ISRAEL	INDIANA	0	0	1	0	0	0	0	0	COSTA RICA	NR	4	1	0	0	1	0	no	0	caso sporadico		4	1	1	0	1	1	1
EN	full	2015	segel, rozemann, lindsley et al. Histoplasmosis in israeli travelers. Am j trop med hyg 2015; 92(6):1168-72		1	31	ISRAEL			0	0	0	0		SOUTH AMERICA	yes	0	1	0	no	ISRAEL	DOMINICAN REPUBLIC	0	0	1	0	0	0	0	0	BOLIVIA, BRASIL	NR	1	1	1	0	1	0	no	0	caso sporadico		4	1	1	0	0	0	0
EN	full	2011	senechal et al. Imported pulmonary histoplasmosis in three french cavers after a trip to cuba. J travel med 2012; 19:64-65		1	54	FRANCE	no	SPELEOLOGIST	1	0	0	0	speleologist	CENTRAL AMERICA	yes	0	1	0	no	FRANCE	CUBA	0	0	1	0	0	0	0	0	CUBA	sierra de los organos, west cuba: red ojo de agua, red rio blanco, cueva manuel noda, cueva del hojo del nodar	1	1	1	0	0	0	no	1		0.25	1	1	1	0	1	1	0
EN	full	2011	senechal et al. Imported pulmonary histoplasmosis in three french cavers after a trip to cuba. J travel med 2012; 19:64-65		1	17	FRANCE	no	SPELEOLOGIST	1	0	0	0	speleologist	CENTRAL AMERICA	yes	0	1	0	no	FRANCE	CUBA	0	0	1	0	0	0	0	0	CUBA	sierra de los organos, west cuba: red ojo de agua, red rio blanco, cueva manuel noda, cueva del hojo del nodar	1	1	1	0	0	0	no	1		0.25	1	1	1	0	1	0	1
biblio	full	1992	Tinelli M, et al. Recurrent Histoplasma capsulatum pneumonia: a case report. 1992; Microbiologica 1992; 15:89-93	1	1	37	ITALY		PROFESSIONAL	0	0	1	0	professional travel	AFRICA	no	1	0	1	no	ITALY	AFRICA	0	0	0	0	1	0	0	0	AFRICA	NR	4	1	0	0	1	1	dust	0	caso sporadico		4	1	1	0	1	1
EN	full	2000	Torres-Rodriguez, J. M., et al. (2000). "[Diagnostic usefulness of the intradermal test with histoplamin in non-endemic areas of histoplasmosis]."Rev Iberoam Micol17(3): 97-101.		1	38	SPAIN		TOURISM	0	1	0	0	tourism	CENTRAL AMERICA	yes	0	1	0	no	SPAIN	NICARAGUA	0	0	1	0	0	0	0	0	NICARAGUA	NR	4	1	0	0	1	0	NR	1		0.6667	2	1	1	0			0
EN	full	2000	Torres-Rodriguez, J. M., et al. (2000). "[Diagnostic usefulness of the intradermal test with histoplamin in non-endemic areas of histoplasmosis]."Rev Iberoam Micol17(3): 97-101.		0	25	SPAIN		VOLUNTEER	0	0	0	1	volunteer	SOUTH AMERICA	yes	0	1	0	no	SPAIN	PERU	0	0	1	0	0	0	0	0	PERU	NR	4	1	0	0	1	0	NR	1		0.6667	2	1	1	0			0
EN	full	2000	Torres-Rodriguez, J. M., et al. (2000). "[Diagnostic usefulness of the intradermal test with histoplamin in non-endemic areas of histoplasmosis]."Rev Iberoam Micol17(3): 97-101.		1	27	SPAIN		VOLUNTEER	0	0	0	1	volunteer	CENTRAL AMERICA	yes	0	1	0	no	SPAIN	DOMINICAN REPUBLIC	0	0	1	0	0	0	0	0	DOMINICAN REPUBLIC	NR	4	1	0	0	1	0	NR	1		0.6667	2	1	1	0			0
EN	full	2000	Torres-Rodriguez, J. M., et al. (2000). "[Diagnostic usefulness of the intradermal test with histoplamin in non-endemic areas of histoplasmosis]."Rev Iberoam Micol17(3): 97-101.		1	29	SPAIN		VOLUNTEER	0	0	0	1	volunteer	CENTRAL AMERICA	yes	0	1	0	no	SPAIN	DOMINICAN REPUBLIC	0	0	1	0	0	0	0	0	DOMINICAN REPUBLIC	NR	4	1	0	0	1	0	NR	1		0.6667	2	1	1	0	0	0	0
EN	full	2000	Torres-Rodriguez, J. M., et al. (2000). "[Diagnostic usefulness of the intradermal test with histoplamin in non-endemic areas of histoplasmosis]."Rev Iberoam Micol17(3): 97-101.		0	20	SPAIN		VOLUNTEER	0	0	0	0	volunteer	CENTRAL AMERICA	yes	0	1	0	no	SPAIN	DOMINICAN REPUBLIC	0	0	1	0	0	0	0	0	GUATEMALA	NR	4	1	0	0	1	1	NR	1		0.6667	2	1	1	0	0	0	0
EN	full	2000	Torres-Rodriguez, J. M., et al. (2000). "[Diagnostic usefulness of the intradermal test with histoplamin in non-endemic areas of histoplasmosis]."Rev Iberoam Micol17(3): 97-101.	12	1	30	SPAIN		VOLUNTEER	0	0	0	0	volunteer	SOUTH AMERICA	yes	0	1	0	no	SPAIN	DOMINICAN REPUBLIC	0	0	0	1	0	0	0	0	COLOMBIA	NR	4	1	0	0	1	1	NR	1	12/18	0.6667	2	1	1	0			0
EN	full	2000	Torres-Rodriguez, J. M., et al. (2000). "[Diagnostic usefulness of the intradermal test with histoplamin in non-endemic areas of histoplasmosis]."Rev Iberoam Micol17(3): 97-101.		0	21	SPAIN		VOLUNTEER	0	0	0	0	volunteer	CENTRAL AMERICA	yes	0	1	0	no	SPAIN	DOMINICAN REPUBLIC	0	0	1	1	0	0	0	0	GUATEMALA	NR	4	1	0	0	1	1	NR	1		0.6667	2	1	1	0	0	0	0
biblio	full	2008	warren et al. Outbreak of histoplasmosis among travelers returning from el salvador pennsylvania and virginia, 2008. JAMA 2009;301:478-480		1		USA	no	VOLUNTEER	0	0	0	0	volunteer	CENTRAL AMERICA	yes	0	1	0	no	USA	EL SALVADOR	0	0	1	0	0	0	0	0	EL SALVADOR	NR	4	1	0	0	1	1	building renovation	1		0.8182	3	1	1	1	1	1	0
biblio	full	2008	warren et al. Outbreak of histoplasmosis among travelers returning from el salvador pennsylvania and virginia, 2008. JAMA 2009;301:478-480		1		USA	no	VOLUNTEER	0	0	0	0	volunteer	CENTRAL AMERICA	yes	0	1	0	no	USA	EL SALVADOR	0	0	1	0	0	0	0	0	EL SALVADOR	NR	4	1	0	0	1	1	building renovation	1		0.8182	3	1	1	1	1	1	0
biblio	full	2008	warren et al. Outbreak of histoplasmosis among travelers returning from el salvador pennsylvania and virginia, 2008. JAMA 2009;301:478-480		1		USA	no	VOLUNTEER	0	0	0	0	volunteer	CENTRAL AMERICA	yes	0	1	0	no	USA	EL SALVADOR	0	0	1	0	0	0	0	0	EL SALVADOR	NR	4	1	0	0	1	1	building renovation	1		0.8182	3	1	1	1	1	1	0
biblio	full	2008	warren et al. Outbreak of histoplasmosis among travelers returning from el salvador pennsylvania and virginia, 2008. JAMA 2009;301:478-480		1		USA	no	VOLUNTEER	0	0	0	0	volunteer	CENTRAL AMERICA	yes	0	1	0	no	USA	EL SALVADOR	0	0	1	0	0	0	0	0	EL SALVADOR	NR	4	1	0	0	1	1	building renovation	1		0.8182	3	1	1	1	1	1	0
biblio	full	2008	warren et al. Outbreak of histoplasmosis among travelers returning from el salvador pennsylvania and virginia, 2008. JAMA 2009;301:478-480		1		USA	no	VOLUNTEER	0	0	0	0	volunteer	CENTRAL AMERICA	yes	0	1	0	no	USA	EL SALVADOR	0	0	1	0	0	0	0	0	EL SALVADOR	NR	4	1	0	0	1	1	building renovation	1		0.8182	3	1	1	1	1	1	0
biblio	full	2008	warren et al. Outbreak of histoplasmosis among travelers returning from el salvador pennsylvania and virginia, 2008. JAMA 2009;301:478-480		1		USA	no	VOLUNTEER	0	0	0	0	volunteer	CENTRAL AMERICA	yes	0	1	0	no	USA	EL SALVADOR	0	0	1	0	0	0	0	0	EL SALVADOR	NR	4	1	0	0	1	1	building renovation	1	5/14	0.3571	1	1	1	1	1	1	0
biblio	full	2008	warren et al. Outbreak of histoplasmosis among travelers returning from el salvador pennsylvania and virginia, 2008. JAMA 2009;301:478-480		0		USA	no	VOLUNTEER	0	0	0	0	volunteer	CENTRAL AMERICA	yes	0	1	0	no	USA	EL SALVADOR	0	0	1	0	0	0	0	0	EL SALVADOR	NR	4	1	0	0	1	1	building renovation	1		0.3571	1	1	1	1	1	1	0
biblio	full	2008	warren et al. Outbreak of histoplasmosis among travelers returning from el salvador pennsylvania and virginia, 2008. JAMA 2009;301:478-480		0		USA	no	VOLUNTEER	0	0	0	0	volunteer	CENTRAL AMERICA	yes	0	1	0	no	USA	EL SALVADOR	0	0	1	0	0	0	0	0	EL SALVADOR	NR	4	1	0	0	1	1	building renovation	1		0.3571	1	1	1	1	1	1	1
biblio	full	2008	warren et al. Outbreak of histoplasmosis among travelers returning from el salvador pennsylvania and virginia, 2008. JAMA 2009;301:478-480		0		USA	no	VOLUNTEER	0	0	0	0	volunteer	CENTRAL AMERICA	yes	0	1	0	no	USA	EL SALVADOR	0	0	1	0	0	0	0	0	EL SALVADOR	NR	4	1	0	0	1	1	building renovation	1		0.75	3	1	1	1	1	1	1
biblio	full	2008	warren et al. Outbreak of histoplasmosis among travelers returning from el salvador pennsylvania and virginia, 2008. JAMA 2009;301:478-480		0		USA	no	VOLUNTEER	0	0	0	0	volunteer	CENTRAL AMERICA	yes	0	1	0	no	USA	EL SALVADOR	0	0	1	0	0	0	0	0	EL SALVADOR	NR	4	1	0	0	1	1	building renovation	1		0.75	3	1	1	1	1	1	1
biblio	full	2008	warren et al. Outbreak of histoplasmosis among travelers returning from el salvador pennsylvania and virginia, 2008. JAMA 2009;301:478-480		1		USA	smoker, previous prostate cancer, dislipidemia	VOLUNTEER	0	0	0	0	volunteer	CENTRAL AMERICA	yes	0	1	0	no	USA	EL SALVADOR	0	0	1	0	0	0	0	0	EL SALVADOR	NR	4	1	0	0	1	1	building renovation	1		0.8182	3	1	1	1	1	1	0
biblio	full	2008	warren et al. Outbreak of histoplasmosis among travelers returning from el salvador pennsylvania and virginia, 2008. JAMA 2009;301:478-480		1		USA	smoker, previous prostate cancer, dislipidemia	VOLUNTEER	0	0	0	0	volunteer	CENTRAL AMERICA	yes	0	1	0	no	USA	EL SALVADOR	0	0	1	0	0	0	0	0	EL SALVADOR	NR	4	1	0	0	1	1	building renovation	1		0.3571	1	1	1	1	1	1	0
biblio	full	2008	warren et al. Outbreak of histoplasmosis among travelers returning from el salvador pennsylvania and virginia, 2008. JAMA 2009;301:478-480		0		USA	smoker, previous prostate cancer, dislipidemia	VOLUNTEER	0	0	0	0	volunteer	CENTRAL AMERICA	yes	0	1	0	no	USA	EL SALVADOR	0	0	1	0	0	0	0	0	EL SALVADOR	NR	4	1	0	0	1	1	building renovation	1		0.75	3	1	1	1	1	1	1
biblio	full	2008	warren et al. Outbreak of histoplasmosis among travelers returning from el salvador pennsylvania and virginia, 2008. JAMA 2009;301:478-480	20	1		USA	no	VOLUNTEER	0	0	0	0	volunteer	CENTRAL AMERICA	yes	0	1	0	no	USA	EL SALVADOR	0	0	1	0	0	0	0	0	EL SALVADOR	NR	4	1	0	0	1	1	building renovation	1	9/11	0.8182	3	1	1	1	1	1	0
biblio	full	2008	warren et al. Outbreak of histoplasmosis among travelers returning from el salvador pennsylvania and virginia, 2008. JAMA 2009;301:478-480		1		USA	no	VOLUNTEER	0	0	0	0	volunteer	CENTRAL AMERICA	yes	0	1	0	no	USA	EL SALVADOR	0	0	1	0	0	0	0	0	EL SALVADOR	NR	4	1	0	0	1	1	building renovation	1		0.8182	3	1	1	1	1	1	0
biblio	full	2008	warren et al. Outbreak of histoplasmosis among travelers returning from el salvador pennsylvania and virginia, 2008. JAMA 2009;301:478-480		1		USA	no	VOLUNTEER	0	0	0	0	volunteer	CENTRAL AMERICA	yes	0	1	0	no	USA	EL SALVADOR	0	0	1	0	0	0	0	0	EL SALVADOR	NR	4	1	0	0	1	1	building renovation	1		0.8182	3	1	1	1	1	1	0
biblio	full	2008	warren et al. Outbreak of histoplasmosis among travelers returning from el salvador pennsylvania and virginia, 2008. JAMA 2009;301:478-480		1		USA	no	VOLUNTEER	0	0	0	0	volunteer	CENTRAL AMERICA	yes	0	1	0	no	USA	EL SALVADOR	0	0	1	0	0	0	0	0	EL SALVADOR	NR	4	1	0	0	1	1	building renovation	1		0.3571	1	1	1	1	1	1	0
biblio	full	2008	warren et al. Outbreak of histoplasmosis among travelers returning from el salvador pennsylvania and virginia, 2008. JAMA 2009;301:478-480		0		USA	no	VOLUNTEER	0	0	0	0	volunteer	CENTRAL AMERICA	yes	0	1	0	no	USA	EL SALVADOR	0	0	1	0	0	0	0	0	EL SALVADOR	NR	4	1	0	0	1	1	building renovation	1	6/8	0.75	3	1	1	1	1	1	1
biblio	full	2008	warren et al. Outbreak of histoplasmosis among travelers returning from el salvador pennsylvania and virginia, 2008. JAMA 2009;301:478-480		0		USA	no	VOLUNTEER	0	0	0	0	volunteer	CENTRAL AMERICA	yes	0	1	0	no	USA	EL SALVADOR	0	0	1	0	0	0	0	0	EL SALVADOR	NR	4	1	0	0	1	1	building renovation	1		0.75	3	1	1	1	1	1	1
biblio	full	2008	warren et al. Outbreak of histoplasmosis among travelers returning from el salvador pennsylvania and virginia, 2008. JAMA 2009;301:478-480		0		USA	no	VOLUNTEER	0	0	0	0	volunteer	CENTRAL AMERICA	yes	0	1	0	no	USA	EL SALVADOR	0	0	1	0	0	0	0	0	EL SALVADOR	NR	4	1	0	0	1	1	building renovation	1		0.75	3	1	1	0	0	0	0
EN	full	1999	Wolff, M. (1999). "[Outbreak of acute histoplasmosis in Chilean travelers to the ecuadorian jungle: an example of geographic medicine]."Rev Med Chil127(11): 1359-1364.				CHILE	no	TOURISM	0	1	0	0	tourism	SOUTH AMERICA	yes	0	1	0	no	CHILE	ECUADOR	0	0	0	1	0	0	0	0	ECUADOR	zone urbane (quito, cuenca, guayaquil) e rurali-selvatiche (tena)	4		0	1	1	0	dust	1		1	3	1	1	0	1	1	0
EN	full	2010	Zollner et al. Clinical and evolutionary characteristics of four patients with pulmonary histoplasmosis reported in the Paraiba Paulista Valley Region. Zollner et al, Rev Soc Bras Med Trop 43(5); 599-601.		1	23															BRASIL	BRASIL	0	0	0	1	0	0	0	0				0	1	0	0	0		0	caso sporadico			1	1	0	0	0	0
EN	full	1981	Castaneda et al. Histoplasmosis epidemica. Aspectos clinicos y serologicos. Biomedica 1981; 1(1): 16-22.		1	16.5															COLOMBIA	COLOMBIA	0	0	0	1	0	0	0	0	0	0	0	0	1	0	0	0		1		0.7857	3	0	0	0	0	0	0
EN	full	1981	Castaneda et al. Histoplasmosis epidemica. Aspectos clinicos y serologicos. Biomedica 1981; 1(1): 16-22.		1	16.5															COLOMBIA	COLOMBIA	0	0	0	1	0	0	0	0	0	0	0	0	1	0	0	0		1		0.7857	3	0	0	0	0	0	0
EN	full	1981	Castaneda et al. Histoplasmosis epidemica. Aspectos clinicos y serologicos. Biomedica 1981; 1(1): 16-22.		0	16.5															COLOMBIA	COLOMBIA	0	0	0	1	0	0	0	0	0	0	0	0	1	0	0	0		1		0.7857	3	0	0	0	0	0	0
EN	full	1981	Castaneda et al. Histoplasmosis epidemica. Aspectos clinicos y serologicos. Biomedica 1981; 1(1): 16-22.		0	16.5															COLOMBIA	COLOMBIA	0	0	0	1	0	0	0	0	0	0	0	0	1	0	0	0		1		0.7857	3	0	0	0	0	0	0
EN	full	1981	Castaneda et al. Histoplasmosis epidemica. Aspectos clinicos y serologicos. Biomedica 1981; 1(1): 16-22.		0	16.5															COLOMBIA	COLOMBIA	0	0	0	1	0	0	0	0	0	0	0	0	1	0	0	0		1		0.7857	3	0	0	0	0	0	0
EN	full	1981	Castaneda et al. Histoplasmosis epidemica. Aspectos clinicos y serologicos. Biomedica 1981; 1(1): 16-22.		0	16.5															COLOMBIA	COLOMBIA	0	0	0	1	0	0	0	0	0	0	0	0	1	0	0	0		1		0.7857	3	0	0	0	0	0	0
EN	full	1981	Castaneda et al. Histoplasmosis epidemica. Aspectos clinicos y serologicos. Biomedica 1981; 1(1): 16-22.		0	16.5															COLOMBIA	COLOMBIA	0	0	0	1	0	0	0	0	0	0	0	0	1	0	0	0		1		0.7857	3	0	0	0	0	0	0
EN	full	1981	Castaneda et al. Histoplasmosis epidemica. Aspectos clinicos y serologicos. Biomedica 1981; 1(1): 16-22.		0	16.5															COLOMBIA	COLOMBIA	0	0	0	1	0	0	0	0	0	0	0	0	1	0	0	0		1		0.7857	3	0	0	0	0	0	0
EN	full	1981	Castaneda et al. Histoplasmosis epidemica. Aspectos clinicos y serologicos. Biomedica 1981; 1(1): 16-22.		0	16.5															COLOMBIA	COLOMBIA	0	0	0	1	0	0	0	0	0	0	0	0	1	0	0	0		1		0.7857	3	0	0	0	0	0	0
EN	full	1981	Castaneda et al. Histoplasmosis epidemica. Aspectos clinicos y serologicos. Biomedica 1981; 1(1): 16-22.		0	16.5															COLOMBIA	COLOMBIA	0	0	0	1	0	0	0	0	0	0	0	0	1	0	0	0		1		0.7857	3	0	0	0	0	0	0
EN	full	1981	Castaneda et al. Histoplasmosis epidemica. Aspectos clinicos y serologicos. Biomedica 1981; 1(1): 16-22.		0	16.5															COLOMBIA	COLOMBIA	0	0	0	1	0	0	0	0	0	0	0	0	1	0	0	0		1		0.7857	3	0	0	0	0	0	0
EN	full	1981	Castaneda et al. Histoplasmosis epidemica. Aspectos clinicos y serologicos. Biomedica 1981; 1(1): 16-22.		0	16.5															COLOMBIA	COLOMBIA	0	0	0	1	0	0	0	0	0	0	0	0	1	0	0	0		1		0.7857	3	0	0	0	0	0	0
EN	full	1981	Castaneda et al. Histoplasmosis epidemica. Aspectos clinicos y serologicos. Biomedica 1981; 1(1): 16-22.		0	16.5															COLOMBIA	COLOMBIA	0	0	0	1	0	0	0	0	0	0	0	0	1	0	0	0		1		0.7857	3	0	0	0	0	0	0
EN	full	1981	Castaneda et al. Histoplasmosis epidemica. Aspectos clinicos y serologicos. Biomedica 1981; 1(1): 16-22.		0	16.5															COLOMBIA	COLOMBIA	0	0	0	1	0	0	0	0	0	0	0	0	1	0	0	0		1		0.7857	3	0	0	0	0	0	0
EN	full	1981	Castaneda et al. Histoplasmosis epidemica. Aspectos clinicos y serologicos. Biomedica 1981; 1(1): 16-22.		0	16.5															COLOMBIA	COLOMBIA	0	0	0	1	0	0	0	0	0	0	0	0	1	0	0	0		1		0.7857	3	0	0	0	0	0	0
EN	full	1981	Castaneda et al. Histoplasmosis epidemica. Aspectos clinicos y serologicos. Biomedica 1981; 1(1): 16-22.		0	16.5															COLOMBIA	COLOMBIA	0	0	0	1	0	0	0	0	0	0	0	0	1	0	0	0		1		0.7857	3	0	0	0	0	0	0
EN	full	1979	Lottenberg, R., et al. (1979). "Pulmonary histoplasmosis associated with exploration of a bat cave."Am J Epidemiol110(2): 156-161.						VOLUNTEER	0	0	0	1	volunteer	USA	no	1	1	0	yes		FLORIDA	1	0	0	0	0	0	0	0	FLORIDA	Suwannee County, north centre Florida	1		1	0	1	0	dust	1		0.931	3	0	0	0	0	0	0
EN	full	1979	Lottenberg, R., et al. (1979). "Pulmonary histoplasmosis associated with exploration of a bat cave."Am J Epidemiol110(2): 156-161.						VOLUNTEER	0	0	0	1	volunteer	USA	no	1	1	0	yes		FLORIDA	1	0	0	0	0	0	0	0	FLORIDA	Suwannee County, north centre Florida	1		1	0	1	0	dust	1		0.931	3	0	0	0	0	0	0
EN	full	1979	Lottenberg, R., et al. (1979). "Pulmonary histoplasmosis associated with exploration of a bat cave."Am J Epidemiol110(2): 156-161.						VOLUNTEER	0	0	0	1	volunteer	USA	no	1	1	0	yes		FLORIDA	1	0	0	0	0	0	0	0	FLORIDA	Suwannee County, north centre Florida	1		1	0	1	0	dust	1		0.931	3	0	0	0	0	0	0
EN	full	1979	Lottenberg, R., et al. (1979). "Pulmonary histoplasmosis associated with exploration of a bat cave."Am J Epidemiol110(2): 156-161.						VOLUNTEER	0	0	0	1	volunteer	USA	no	1	1	0	yes		FLORIDA	1	0	0	0	0	0	0	0	FLORIDA	Suwannee County, north centre Florida	1		1	0	1	0	dust	1		0.931	3	0	0	0	0	0	0
EN	full	1979	Lottenberg, R., et al. (1979). "Pulmonary histoplasmosis associated with exploration of a bat cave."Am J Epidemiol110(2): 156-161.						VOLUNTEER	0	0	0	1	volunteer	USA	no	1	1	0	yes		FLORIDA	1	0	0	0	0	0	0	0	FLORIDA	Suwannee County, north centre Florida	1		1	0	1	0	dust	1		0.931	3	0	0	0	0	0	0
EN	full	1979	Lottenberg, R., et al. (1979). "Pulmonary histoplasmosis associated with exploration of a bat cave."Am J Epidemiol110(2): 156-161.						VOLUNTEER	0	0	0	1	volunteer	USA	no	1	1	0	yes		FLORIDA	1	0	0	0	0	0	0	0	FLORIDA	Suwannee County, north centre Florida	1		1	0	1	0	dust	1		0.931	3	0	0	0	0	0	0
EN	full	1979	Lottenberg, R., et al. (1979). "Pulmonary histoplasmosis associated with exploration of a bat cave."Am J Epidemiol110(2): 156-161.						VOLUNTEER	0	0	0	1	volunteer	USA	no	1	1	0	yes		FLORIDA	1	0	0	0	0	0	0	0	FLORIDA	Suwannee County, north centre Florida	1		1	0	1	0	dust	1		0.931	3	0	0	0	0	0	0
EN	full	1979	Lottenberg, R., et al. (1979). "Pulmonary histoplasmosis associated with exploration of a bat cave."Am J Epidemiol110(2): 156-161.						VOLUNTEER	0	0	0	1	volunteer	USA	no	1	1	0	yes		FLORIDA	1	0	0	0	0	0	0	0	FLORIDA	Suwannee County, north centre Florida	1		1	0	1	0	dust	1		0.931	3	0	0	0	0	0	0
EN	full	2004	Lyon, G. M., et al. (2004). "Histoplasmosis associated with exploring a bat-inhabited cave in Costa Rica, 1998-1999."Am J Trop Med Hyg70(4): 438-442.		1	14	USA		TOURISM	0	1	0	0	tourism	CENTRAL AMERICA	yes	0	1	0	no	USA	COSTA RICA	0	0	1	0	0	0	0	0	COSTA RICA	NR	1	1	1	0	0	0	no	1		0.9	3	0	0	0	1	0	1
biblio	full	1957	murray et al. 1957. benign pulmonary histoplasmosis (cave disease) in South Africa. South afr med j 31: 245-253						TOURISM	0	1	0	0	student	SOUTH AFRICA	no	1	0	1	no		SOUTH AFRICA	0	0	0	0	1	0	0	0	SOUTH AFRICA	potgietersrust,	1		1	0	0	0	no	1		0.75	3	0	0	0	0	0	0
biblio	full	1957	murray et al. 1957. benign pulmonary histoplasmosis (cave disease) in South Africa. South afr med j 31: 245-253						SPELEOLOGIST	1	0	0	0	speleologist	SOUTH AFRICA	no	1	0	1	no		SOUTH AFRICA	0	0	0	0	1	0	0	0	SOUTH AFRICA	NR	1		1	0	0	0	no	1	22/29	0.7586	3	0	0	0	0	0	0
biblio	full	1957	murray et al. 1957. benign pulmonary histoplasmosis (cave disease) in South Africa. South afr med j 31: 245-253						SPELEOLOGIST	1	0	0	0	speleologist	SOUTH AFRICA	no	1	0	1	no		SOUTH AFRICA	0	0	0	0	1	0	0	0	SOUTH AFRICA	NR	1		1	0	0	0	no	1		0.7586	3	0	0	0	0	0	0
biblio	full	1957	murray et al. 1957. benign pulmonary histoplasmosis (cave disease) in South Africa. South afr med j 31: 245-253						SPELEOLOGIST	1	0	0	0	speleologist	SOUTH AFRICA	no	1	0	1	no		SOUTH AFRICA	0	0	0	0	1	0	0	0	SOUTH AFRICA	NR	1		1	0	0	0	no	1		0.7586	3	0	0	0	0	0	0
biblio	full	1957	murray et al. 1957. benign pulmonary histoplasmosis (cave disease) in South Africa. South afr med j 31: 245-253						SPELEOLOGIST	1	0	0	0	speleologist	SOUTH AFRICA	no	1	0	1	no		SOUTH AFRICA	0	0	0	0	1	0	0	0	SOUTH AFRICA	NR	1		1	0	0	0	no	1		0.7586	3	0	0	0	0	0	0
EN	full	1995	Noel, M., et al. (1995). "[Epidemic of pulmonary histoplasmosis after visiting a cave in New Caledonia]."Sante5(4): 219-225.	24	1	40	EUROPE		SPELEOLOGIST	1	0	0	0	speleologist	AUSTRALIA E OCEANIA	no	1	0	1	no	EUROPE	NEW CALEDONIA	0	0	0	0	0	1	0	1	NEW CALEDONIA	sud, Touaurou	1	1	1	0	0	0	no	1	21/24 (87.5%)	0.875	3	0	0	0	0	0	0
EN	full	1995	Noel, M., et al. (1995). "[Epidemic of pulmonary histoplasmosis after visiting a cave in New Caledonia]."Sante5(4): 219-225.		1	23	EUROPE		SPELEOLOGIST	1	0	0	0	speleologist	AUSTRALIA E OCEANIA	no	1	0	1	no	EUROPE	NEW CALEDONIA	0	0	0	0	0	1	0	1	NEW CALEDONIA	sud, Touaurou	1	1	1	0	0	0	no	1		0.875	3	0	0	0	0	0	0
EN	full	1995	Noel, M., et al. (1995). "[Epidemic of pulmonary histoplasmosis after visiting a cave in New Caledonia]."Sante5(4): 219-225.		1	21	EUROPE	smoker	SPELEOLOGIST	1	0	0	0	speleologist	AUSTRALIA E OCEANIA	no	1	0	1	no	EUROPE	NEW CALEDONIA	0	0	0	0	0	1	0	1	NEW CALEDONIA	sud, Touaurou	1	1	1	0	0	0	no	1		0.875	3	0	0	0	0	0	0
EN	full	2015	segel, rozemann, lindsley et al. Histoplasmosis in israeli travelers. Am j trop med hyg 2015; 92(6):1168-72		1	31	ISRAEL			0	0	0	0		NORTH AMERICA	yes	0	1	0	yes	ISRAEL	CENTRAL AMERICA, GUATEMALA	0	1	0	0	0	0	0	0	MEXICO	NR	1	1	1	0	0	0	no	0	caso sporadico		4	0	0	0	0	0	0
EN	full	2015	segel, rozemann, lindsley et al. Histoplasmosis in israeli travelers. Am j trop med hyg 2015; 92(6):1168-72		0	31	ISRAEL			0	0	0	0		CENTRAL AMERICA	yes	0	1	0	no	ISRAEL	SOUTH AMERICA	0	0	1	0	0	0	0	0	CENTRAL AMERICA, GUATEMALA	NR	1	1	1	0	0	0	no	0	caso sporadico		4	0	0	0	0	0	0
EN	full	2015	segel, rozemann, lindsley et al. Histoplasmosis in israeli travelers. Am j trop med hyg 2015; 92(6):1168-72		1	31	ISRAEL			0	0	0	0		CENTRAL AMERICA	yes	0	1	0	no	ISRAEL	CENTRAL AMERICA, GUATEMALA	0	0	1	0	0	0	0	0	GUATEMALA	NR	1	1	1	0	0	0	no	0	caso sporadico		4	0	0	0	0	0	0
EN	full	2015	segel, rozemann, lindsley et al. Histoplasmosis in israeli travelers. Am j trop med hyg 2015; 92(6):1168-72		1	31	ISRAEL			0	0	0	0		CENTRAL AMERICA	yes	0	1	0	no	ISRAEL	CENTRAL AMERICA, GUATEMALA	0	0	1	0	0	0	0	0	GUATEMALA	NR	1	1	1	0	0	0	no	0	caso sporadico		4	0	0	0	0	0	0
EN	full	2015	segel, rozemann, lindsley et al. Histoplasmosis in israeli travelers. Am j trop med hyg 2015; 92(6):1168-72		1	31	ISRAEL			0	0	0	0		CENTRAL AMERICA	yes	0	1	0	no	ISRAEL	GUATEMALA	0	0	1	0	0	0	0	0	CENTRAL AMERICA, GUATEMALA	NR	1	1	1	0	0	0	no	0	caso sporadico		4	0	0	0	0	0	0
EN	full	2015	segel, rozemann, lindsley et al. Histoplasmosis in israeli travelers. Am j trop med hyg 2015; 92(6):1168-72		1	31	ISRAEL			0	0	0	0		CENTRAL AMERICA	yes	0	1	0	no	ISRAEL	CENTRAL AMERICA, GUATEMALA	0	0	1	0	0	0	0	0	CENTRAL-SOUTH AMERICA	NR	1	1	1	0	0	0	no	0	caso sporadico		4	0	0	0	0	0	0
EN	full	2015	segel, rozemann, lindsley et al. Histoplasmosis in israeli travelers. Am j trop med hyg 2015; 92(6):1168-72		1	31	ISRAEL			0	0	0	0		CENTRAL AMERICA	yes	0	1	0	no	ISRAEL	BOLIVIA, BRASIL	0	0	1	0	0	0	0	0	CENTRAL AMERICA	NR	1	1	1	0	0	0	no	0	caso sporadico		4	0	0	0	0	0	0
EN	full	2015	segel, rozemann, lindsley et al. Histoplasmosis in israeli travelers. Am j trop med hyg 2015; 92(6):1168-72		1	31	ISRAEL			0	0	0	0		CENTRAL AMERICA	yes	0	1	0	no	ISRAEL	BOLIVIA, PERU	0	0	1	0	0	0	0	0	DOMINICAN REPUBLIC	NR	1	1	1	0	0	0	no	0	caso sporadico		4	0	0	0	0	0	0
EN	full	2015	segel, rozemann, lindsley et al. Histoplasmosis in israeli travelers. Am j trop med hyg 2015; 92(6):1168-72		1	31	ISRAEL			0	0	0	0		USA	no	1	1	0	no	ISRAEL	PERU	1	0	1	0	0	0	0	0	INDIANA	indianapolis	1	1	1	0	0	0	no	0	caso sporadico		4	0	0	0	0	0	0
EN	full	2000	Torres-Rodriguez, J. M., et al. (2000). "[Diagnostic usefulness of the intradermal test with histoplamin in non-endemic areas of histoplasmosis]."Rev Iberoam Micol17(3): 97-101.		1	32	SPAIN		SPELEOLOGIST	1	0	0	0	speleologist	CENTRAL AMERICA	yes	0	1	0	no	SPAIN	HONDURAS	0	0	1	0	0	0	0	0	HONDURAS	NR	1	1	1	0	0	0	NR	1		0.6667	2	0	0	0			0
EN	full	2000	Torres-Rodriguez, J. M., et al. (2000). "[Diagnostic usefulness of the intradermal test with histoplamin in non-endemic areas of histoplasmosis]."Rev Iberoam Micol17(3): 97-101.		0	21	SPAIN		VOLUNTEER	0	0	0	1	volunteer	CENTRAL AMERICA	yes	0	1	0	no	SPAIN	COLOMBIA	0	0	1	0	0	0	0	0	DOMINICAN REPUBLIC	NR	4	1	0	0	1	0	NR	1		0.6667	2	0	0	0	0	0	0
EN	full	2000	Torres-Rodriguez, J. M., et al. (2000). "[Diagnostic usefulness of the intradermal test with histoplamin in non-endemic areas of histoplasmosis]."Rev Iberoam Micol17(3): 97-101.		1	23	SPAIN		VOLUNTEER	0	0	0	1	volunteer	CENTRAL AMERICA	yes	0	1	0	no	SPAIN	GUATEMALA	0	0	1	0	0	0	0	0	DOMINICAN REPUBLIC	NR	4	1	0	0	1	0	NR	1		0.6667	2	0	0	0	0	0	0
EN	full	2000	Torres-Rodriguez, J. M., et al. (2000). "[Diagnostic usefulness of the intradermal test with histoplamin in non-endemic areas of histoplasmosis]."Rev Iberoam Micol17(3): 97-101.		0	25	SPAIN		VOLUNTEER	0	0	0	1	volunteer	CENTRAL AMERICA	yes	0	1	0	no	SPAIN	GUATEMALA	0	0	1	0	0	0	0	0	DOMINICAN REPUBLIC	NR	4	1	0	0	1	0	NR	1		0.6667	2	0	0	0			0
EN	full	2000	Torres-Rodriguez, J. M., et al. (2000). "[Diagnostic usefulness of the intradermal test with histoplamin in non-endemic areas of histoplasmosis]."Rev Iberoam Micol17(3): 97-101.		0	23	SPAIN		VOLUNTEER	0	0	0	0	volunteer	CENTRAL AMERICA	yes	0	1	0	no	SPAIN	GUATEMALA	0	0	1	0	0	0	0	0	GUATEMALA	NR	4	1	0	0	1	1	NR	1		0.6667	2	0	0	0			0
EN	full	2003	Weinberg, M., et al. (2003). "Severe histoplasmosis in travelers to Nicaragua."Emerg Infect Dis9(10): 1322-1325.		1	38	USA	no	TOURISM	0	1	0	0	student	CENTRAL AMERICA	yes	0	1	0	no	USA	NICARAGUA	0	0	1	0	0	0	0	0	NICARAGUA	NR	1	1	1	0	0	0	no	1		1	3	0	0	0	0	0	0
EN	full	2003	Weinberg, M., et al. (2003). "Severe histoplasmosis in travelers to Nicaragua."Emerg Infect Dis9(10): 1322-1325.		1	38	USA	no	TOURISM	0	1	0	0	student	CENTRAL AMERICA	yes	0	1	0	no	USA	NICARAGUA	0	0	1	0	0	0	0	0	NICARAGUA	NR	1	1	1	0	0	0	no	1		1	3	0	0	0	0	0	0
EN	full	2015	Gandhi et al. Update on the spectrum of histoplasmosis among hispanic patients presenting to a New York City municipal hospital: a contemporary case series. Res Med Case Rep 16: 60-64.																		MEXICO	MEXICO	0	1	0	0	0	0	0	0				0	0	0	0	1		1		1	3
EN	full	2015	Gandhi et al. Update on the spectrum of histoplasmosis among hispanic patients presenting to a New York City municipal hospital: a contemporary case series. Res Med Case Rep 16: 60-64.																		MEXICO	MEXICO	0	1	0	0	0	0	0	0				0	0	0	0	1		1		1	3
EN	full	2015	Gandhi et al. Update on the spectrum of histoplasmosis among hispanic patients presenting to a New York City municipal hospital: a contemporary case series. Res Med Case Rep 16: 60-64.																		MEXICO	MEXICO	0	1	0	0	0	0	0	0				0	0	0	0	1		1		1	3
biblio	full	1957	murray et al. 1957. benign pulmonary histoplasmosis (cave disease) in South Africa. South afr med j 31: 245-253						SPELEOLOGIST	1	0	0	0	speleologist	SOUTH AFRICA	no	1	0	1	no		SOUTH AFRICA	0	0	0	0	1	0	0	0	SOUTH AFRICA	NR	1		1	0	0	0	no	1		0.7586	3
biblio	full	1957	murray et al. 1957. benign pulmonary histoplasmosis (cave disease) in South Africa. South afr med j 31: 245-253						SPELEOLOGIST	1	0	0	0	speleologist	SOUTH AFRICA	no	1	0	1	no		SOUTH AFRICA	0	0	0	0	1	0	0	0	SOUTH AFRICA	NR	1		1	0	0	0	no	1		0.7586	3
biblio	full	1957	murray et al. 1957. benign pulmonary histoplasmosis (cave disease) in South Africa. South afr med j 31: 245-253						SPELEOLOGIST	1	0	0	0	speleologist	SOUTH AFRICA	no	1	0	1	no		SOUTH AFRICA	0	0	0	0	1	0	0	0	SOUTH AFRICA	NR	1		1	0	0	0	no	1		0.7586	3
biblio	full	1957	murray et al. 1957. benign pulmonary histoplasmosis (cave disease) in South Africa. South afr med j 31: 245-253						SPELEOLOGIST	1	0	0	0	speleologist	SOUTH AFRICA	no	1	0	1	no		SOUTH AFRICA	0	0	0	0	1	0	0	0	SOUTH AFRICA	NR	1		1	0	0	0	no	1		0.7586	3
biblio	full	1957	murray et al. 1957. benign pulmonary histoplasmosis (cave disease) in South Africa. South afr med j 31: 245-253						SPELEOLOGIST	1	0	0	0	speleologist	SOUTH AFRICA	no	1	0	1	no		SOUTH AFRICA	0	0	0	0	1	0	0	0	SOUTH AFRICA	NR	1		1	0	0	0	no	1		0.7586	3
biblio	full	1957	murray et al. 1957. benign pulmonary histoplasmosis (cave disease) in South Africa. South afr med j 31: 245-253						SPELEOLOGIST	1	0	0	0	speleologist	SOUTH AFRICA	no	1	0	1	no		SOUTH AFRICA	0	0	0	0	1	0	0	0	SOUTH AFRICA	NR	1		1	0	0	0	no	1		0.7586	3
biblio	full	1957	murray et al. 1957. benign pulmonary histoplasmosis (cave disease) in South Africa. South afr med j 31: 245-253						SPELEOLOGIST	1	0	0	0	speleologist	SOUTH AFRICA	no	1	0	1	no		SOUTH AFRICA	0	0	0	0	1	0	0	0	SOUTH AFRICA	NR	1		1	0	0	0	no	1		0.7586	3
biblio	full	1957	murray et al. 1957. benign pulmonary histoplasmosis (cave disease) in South Africa. South afr med j 31: 245-253						SPELEOLOGIST	1	0	0	0	speleologist	SOUTH AFRICA	no	1	0	1	no		SOUTH AFRICA	0	0	0	0	1	0	0	0	SOUTH AFRICA	NR	1		1	0	0	0	no	1		0.7586	3
biblio	full	1957	murray et al. 1957. benign pulmonary histoplasmosis (cave disease) in South Africa. South afr med j 31: 245-253						SPELEOLOGIST	1	0	0	0	speleologist	SOUTH AFRICA	no	1	0	1	no		SOUTH AFRICA	0	0	0	0	1	0	0	0	SOUTH AFRICA	NR	1		1	0	0	0	no	1		0.7586	3
biblio	full	1957	murray et al. 1957. benign pulmonary histoplasmosis (cave disease) in South Africa. South afr med j 31: 245-253						SPELEOLOGIST	1	0	0	0	speleologist	SOUTH AFRICA	no	1	0	1	no		SOUTH AFRICA	0	0	0	0	1	0	0	0	SOUTH AFRICA	NR	1		1	0	0	0	no	1		0.7586	3
biblio	full	1957	murray et al. 1957. benign pulmonary histoplasmosis (cave disease) in South Africa. South afr med j 31: 245-253						SPELEOLOGIST	1	0	0	0	speleologist	SOUTH AFRICA	no	1	0	1	no		SOUTH AFRICA	0	0	0	0	1	0	0	0	SOUTH AFRICA	NR	1		1	0	0	0	no	1		0.7586	3
biblio	full	1957	murray et al. 1957. benign pulmonary histoplasmosis (cave disease) in South Africa. South afr med j 31: 245-253						SPELEOLOGIST	1	0	0	0	speleologist	SOUTH AFRICA	no	1	0	1	no		SOUTH AFRICA	0	0	0	0	1	0	0	0	SOUTH AFRICA	NR	1		1	0	0	0	no	1		0.7586	3
biblio	full	1957	murray et al. 1957. benign pulmonary histoplasmosis (cave disease) in South Africa. South afr med j 31: 245-253						SPELEOLOGIST	1	0	0	0	speleologist	SOUTH AFRICA	no	1	0	1	no		SOUTH AFRICA	0	0	0	0	1	0	0	0	SOUTH AFRICA	NR	1		1	0	0	0	no	1		0.7586	3
biblio	full	1957	murray et al. 1957. benign pulmonary histoplasmosis (cave disease) in South Africa. South afr med j 31: 245-253						SPELEOLOGIST	1	0	0	0	speleologist	SOUTH AFRICA	no	1	0	1	no		SOUTH AFRICA	0	0	0	0	1	0	0	0	SOUTH AFRICA	NR	1		1	0	0	0	no	1		0.7586	3
biblio	full	1957	murray et al. 1957. benign pulmonary histoplasmosis (cave disease) in South Africa. South afr med j 31: 245-253						SPELEOLOGIST	1	0	0	0	speleologist	SOUTH AFRICA	no	1	0	1	no		SOUTH AFRICA	0	0	0	0	1	0	0	0	SOUTH AFRICA	NR	1		1	0	0	0	no	1		0.7586	3
biblio	full	1957	murray et al. 1957. benign pulmonary histoplasmosis (cave disease) in South Africa. South afr med j 31: 245-253						SPELEOLOGIST	1	0	0	0	speleologist	SOUTH AFRICA	no	1	0	1	no		SOUTH AFRICA	0	0	0	0	1	0	0	0	SOUTH AFRICA	NR	1		1	0	0	0	no	1		0.7586	3
biblio	full	1957	murray et al. 1957. benign pulmonary histoplasmosis (cave disease) in South Africa. South afr med j 31: 245-253						SPELEOLOGIST	1	0	0	0	speleologist	SOUTH AFRICA	no	1	0	1	no		SOUTH AFRICA	0	0	0	0	1	0	0	0	SOUTH AFRICA	NR	1		1	0	0	0	no	1		0.7586	3
biblio	full	1957	murray et al. 1957. benign pulmonary histoplasmosis (cave disease) in South Africa. South afr med j 31: 245-253						SPELEOLOGIST	1	0	0	0	speleologist	SOUTH AFRICA	no	1	0	1	no		SOUTH AFRICA	0	0	0	0	1	0	0	0	SOUTH AFRICA	NR	1		1	0	0	0	no	1		0.7586	3
biblio	full	1957	murray et al. 1957. benign pulmonary histoplasmosis (cave disease) in South Africa. South afr med j 31: 245-253						SPELEOLOGIST	1	0	0	0	speleologist	SOUTH AFRICA	no	1	0	1	no	EUROPE	SOUTH AFRICA	0	0	0	0	1	0	0	0	SOUTH AFRICA	NR	1	1	1	0	0	0	no	1		0.7586	3
biblio	full	1957	murray et al. 1957. benign pulmonary histoplasmosis (cave disease) in South Africa. South afr med j 31: 245-253						SPELEOLOGIST	1	0	0	0	speleologist	SOUTH AFRICA	no	1	0	1	no		SOUTH AFRICA	0	0	0	0	1	0	0	0	SOUTH AFRICA	NR	1		1	0	0	0	no	1		0.7586	3
biblio	full	1957	murray et al. 1957. benign pulmonary histoplasmosis (cave disease) in South Africa. South afr med j 31: 245-253						SPELEOLOGIST	1	0	0	0	speleologist	SOUTH AFRICA	no	1	0	1	no		SOUTH AFRICA	0	0	0	0	1	0	0	0	SOUTH AFRICA	NR	1		1	0	0	0	no	1		0.7586	3
biblio	full	1957	murray et al. 1957. benign pulmonary histoplasmosis (cave disease) in South Africa. South afr med j 31: 245-253						SPELEOLOGIST	1	0	0	0	speleologist	SOUTH AFRICA	no	1	0	1	no		SOUTH AFRICA	0	0	0	0	1	0	0	0	SOUTH AFRICA	NR	1		1	0	0	0	no	1	10/10	1	3
biblio	full	1957	murray et al. 1957. benign pulmonary histoplasmosis (cave disease) in South Africa. South afr med j 31: 245-253						SPELEOLOGIST	1	0	0	0	speleologist	SOUTH AFRICA	no	1	0	1	no		SOUTH AFRICA	0	0	0	0	1	0	0	0	SOUTH AFRICA	NR	1		1	0	0	0	no	1		1	3
biblio	full	1957	murray et al. 1957. benign pulmonary histoplasmosis (cave disease) in South Africa. South afr med j 31: 245-253						SPELEOLOGIST	1	0	0	0	speleologist	SOUTH AFRICA	no	1	0	1	no		SOUTH AFRICA	0	0	0	0	1	0	0	0	SOUTH AFRICA	NR	1		1	0	0	0	no	1		1	3
biblio	full	1957	murray et al. 1957. benign pulmonary histoplasmosis (cave disease) in South Africa. South afr med j 31: 245-253						SPELEOLOGIST	1	0	0	0	speleologist	SOUTH AFRICA	no	1	0	1	no		SOUTH AFRICA	0	0	0	0	1	0	0	0	SOUTH AFRICA	NR	1		1	0	0	0	no	1		1	3
biblio	full	1957	murray et al. 1957. benign pulmonary histoplasmosis (cave disease) in South Africa. South afr med j 31: 245-253						SPELEOLOGIST	1	0	0	0	speleologist	SOUTH AFRICA	no	1	0	1	no		SOUTH AFRICA	0	0	0	0	1	0	0	0	SOUTH AFRICA	NR	1		1	0	0	0	no	1		1	3
biblio	full	1957	murray et al. 1957. benign pulmonary histoplasmosis (cave disease) in South Africa. South afr med j 31: 245-253						SPELEOLOGIST	1	0	0	0	speleologist	SOUTH AFRICA	no	1	0	1	no		SOUTH AFRICA	0	0	0	0	1	0	0	0	SOUTH AFRICA	NR	1		1	0	0	0	no	1		1	3
biblio	full	1957	murray et al. 1957. benign pulmonary histoplasmosis (cave disease) in South Africa. South afr med j 31: 245-253						SPELEOLOGIST	1	0	0	0	speleologist	SOUTH AFRICA	no	1	0	1	no		SOUTH AFRICA	0	0	0	0	1	0	0	0	SOUTH AFRICA	NR	1		1	0	0	0	no	1		1	3
biblio	full	1957	murray et al. 1957. benign pulmonary histoplasmosis (cave disease) in South Africa. South afr med j 31: 245-253						SPELEOLOGIST	1	0	0	0	speleologist	SOUTH AFRICA	no	1	0	1	no	EUROPE	SOUTH AFRICA	0	0	0	0	1	0	0	0	SOUTH AFRICA	NR	1	1	1	0	0	0	no	1		1	3
biblio	full	1957	murray et al. 1957. benign pulmonary histoplasmosis (cave disease) in South Africa. South afr med j 31: 245-253						SPELEOLOGIST	1	0	0	0	speleologist	SOUTH AFRICA	no	1	0	1	no		SOUTH AFRICA	0	0	0	0	1	0	0	0	SOUTH AFRICA	NR	1		1	0	0	0	no	1		1	3
biblio	full	1957	murray et al. 1957. benign pulmonary histoplasmosis (cave disease) in South Africa. South afr med j 31: 245-253						SPELEOLOGIST	1	0	0	0	speleologist	SOUTH AFRICA	no	1	0	1	no		SOUTH AFRICA	0	0	0	0	1	0	0	0	SOUTH AFRICA	NR	1		1	0	0	0	no	1	14/14	1	3
biblio	full	1957	murray et al. 1957. benign pulmonary histoplasmosis (cave disease) in South Africa. South afr med j 31: 245-253						SPELEOLOGIST	1	0	0	0	speleologist	SOUTH AFRICA	no	1	0	1	no		SOUTH AFRICA	0	0	0	0	1	0	0	0	SOUTH AFRICA	NR	1		1	0	0	0	no	1		1	3
biblio	full	1957	murray et al. 1957. benign pulmonary histoplasmosis (cave disease) in South Africa. South afr med j 31: 245-253						SPELEOLOGIST	1	0	0	0	speleologist	SOUTH AFRICA	no	1	0	1	no		SOUTH AFRICA	0	0	0	0	1	0	0	0	SOUTH AFRICA	NR	1		1	0	0	0	no	1		1	3
biblio	full	1957	murray et al. 1957. benign pulmonary histoplasmosis (cave disease) in South Africa. South afr med j 31: 245-253						SPELEOLOGIST	1	0	0	0	speleologist	SOUTH AFRICA	no	1	0	1	no		SOUTH AFRICA	0	0	0	0	1	0	0	0	SOUTH AFRICA	NR	1		1	0	0	0	no	1		1	3
biblio	full	1957	murray et al. 1957. benign pulmonary histoplasmosis (cave disease) in South Africa. South afr med j 31: 245-253						SPELEOLOGIST	1	0	0	0	speleologist	SOUTH AFRICA	no	1	0	1	no		SOUTH AFRICA	0	0	0	0	1	0	0	0	SOUTH AFRICA	NR	1		1	0	0	0	no	1		1	3
biblio	full	1957	murray et al. 1957. benign pulmonary histoplasmosis (cave disease) in South Africa. South afr med j 31: 245-253						SPELEOLOGIST	1	0	0	0	speleologist	SOUTH AFRICA	no	1	0	1	no		SOUTH AFRICA	0	0	0	0	1	0	0	0	SOUTH AFRICA	NR	1		1	0	0	0	no	1		1	3
biblio	full	1957	murray et al. 1957. benign pulmonary histoplasmosis (cave disease) in South Africa. South afr med j 31: 245-253						SPELEOLOGIST	1	0	0	0	speleologist	SOUTH AFRICA	no	1	0	1	no		SOUTH AFRICA	0	0	0	0	1	0	0	0	SOUTH AFRICA	NR	1		1	0	0	0	no	1		1	3
biblio	full	1957	murray et al. 1957. benign pulmonary histoplasmosis (cave disease) in South Africa. South afr med j 31: 245-253						SPELEOLOGIST	1	0	0	0	speleologist	SOUTH AFRICA	no	1	0	1	no		SOUTH AFRICA	0	0	0	0	1	0	0	0	SOUTH AFRICA	NR	1		1	0	0	0	no	1		1	3
biblio	full	1957	murray et al. 1957. benign pulmonary histoplasmosis (cave disease) in South Africa. South afr med j 31: 245-253						SPELEOLOGIST	1	0	0	0	speleologist	SOUTH AFRICA	no	1	0	1	no	EUROPE	SOUTH AFRICA	0	0	0	0	1	0	0	0	SOUTH AFRICA	NR	1	1	1	0	0	0	no	1		1	3
EN	full	1966	Wyborney, V. J., et al. (1966). "Histoplasmosis. A review of three cases studied in San Diego County."Calif Med105(4): 265-270.		1	8	USA	no	TOURISM	0	1	0	0		USA	no	1	1	0	yes	USA	KENTUCKY	1	0	0	0	0	0	0	0	KENTUCKY	NR	3		0	1	0	0	no	0	caso sporadico		4
[truncated: 71 more columns]
